# Supplementary material
Source: publisher figshare collection journal article supplement (https://tandf.figshare.com/articles/dataset/_/7604762)
Supplement: Supplementary file 1 [file 1]

>Abies\_guatemalensis\_DSG625

TTAACTTATTATACTCCTGAATATCAGACCAAAGATACGGATATCTTGGCGGCATTCCGA  
GTAACCTCCTCAACCTGGGGTGCCGCCCAGGAAGCGGGAGCAGCAGTAGCTGCTGAATCT  
TCCACCGGTACATGGACCACTGTTTGGACCGATGGACTTACCAGTCTTGATCGTTACAAA  
GGGCGATGCTATGACATCGAGCCCGTTCCTGGAGAGGAAAGTCAATTTATTGCCTATGTA  
GCTTACCCCTTAGACCTTTTCGAAGAAGGTTCTGTTACTAACTTGTTTACTTCCATTGTA  
GGTAATGTATTTGGATTCAAGGCCCTACGGGCTTTACGTTTGGAAGATTGCGGATTCCC  
CCTGCTTATTCCAAAACCTTTTCAAGGTCCACCTCATGGTATCCAAGTTGAAAGAGATAAA  
TTGAACAAATATGGCCGTCCTTTGTTGGGATGTACTATCAAACCAAATTTGGGTCTATCG  
GCTAAGAACTATGGTAGAGCAGTTTACGAATGTCT

>Abies\_guatemalensis\_DSG626

TTAACTTATTATACTCCTGAATATCAGACCAAAGATACGGATATCTTGGCGGCATTCCGA  
GTAACCTCCTCAACCTGGGGTGCCGCCCAGGAAGCGGGAGCAGCAGTAGCTGCTGAATCT  
TCCACCGGTACATGGACCACTGTTTGGACCGATGGACTTACCAGTCTTGATCGTTACAAA  
GGGCGATGCTATGACATCGAGCCCGTTCCTGGAGAGGAAAGTCAATTTATTGCCTATGTA  
GCTTACCCCTTAGACCTTTTCGAAGAAGGTTCTGTTACTAACTTGTTTACTTCCATTGTA  
GGTAATGTATTTGGATTCAAGGCCCTACGGGCTTTACGTTTGGAAGATTGCGGATTCCC  
CCTGCTTATTCCAAAACCTTTTCAAGGTCCACCTCATGGTATCCAAGTTGAAAGAGATAAA  
TTGAACAAATATGGCCGTCCTTTGTTGGGATGTACTATCAAACCAAATTTGGGTCTATCG  
GCTAAGAACTATGGTAGAGCAGTTTACGAATGTCT

>Abies\_guatemalensis\_DSG628

TTAACTTATTATACTCCTGAATATCAGACCAAAGATACGGATATCTTGGCGGCATTCCGA  
GTAACCTCCTCAACCTGGGGTGCCGCCCAGGAAGCGGGAGCAGCAGTAGCTGCTGAATCT  
TCCACCGGTACATGGACCACTGTTTGGACCGATGGACTTACCAGTCTTGATCGTTACAAA  
GGGCGATGCTATGACATCGAGCCCGTTCCTGGAGAGGAAAGTCAATTTATTGCCTATGTA  
GCTTACCCCTTAGACCTTTTCGAAGAAGGTTCTGTTACTAACTTGTTTACTTCCATTGTA  
GGTAATGTATTTGGATTCAAGGCCCTACGGGCTTTACGTTTGGAAGATTGCGGATTCCC  
CCTGCTTATTCCAAAACCTTTTCAAGGTCCACCTCATGGTATCCAAGTTGAAAGAGATAAA  
TTGAACAAATATGGCCGTCCTTTGTTGGGATGTACTATCAAACCAAATTTGGGTCTATCG  
GCTAAGAACTATGGTAGAGCAGTTTACGAATGTCT

>Abies\_guatemalensis\_SHL117

TTAACTTATTATACTCCTGAATATCAGACCAAAGATACGGATATCTTGGCGGCATTCCGA  
GTAACCTCCTCAACCTGGGGTGCCGCCCAGGAAGCGGGAGCAGCAGTAGCTGCTGAATCT  
TCCACCGGTACATGGACCACTGTTTGGACCGATGGACTTACCAGTCTTGATCGTTACAAA  
GGGCGATGCTATGACATCGAGCCCGTTCCTGGAGAGGAAAGTCAATTTATTGCCTATGTA  
GCTTACCCCTTAGACCTTTTCGAAGAAGGTTCTGTTACTAACTTGTTTACTTCCATTGTA  
GGTAATGTATTTGGATTCAAGGCCCTACGGGCTTTACGTTTGGAAGATTGCGGATTCCC  
CCTGCTTATTCCAAAACCTTTTCAAGGTCCACCTCATGGTATCCAAGTTGAAAGAGATAAA  
TTGAACAAATATGGCCGTCCTTTGTTGGGATGTACTATCAAACCAAATTTGGGTCTATCG  
GCTAAGAACTATGGTAGAGCAGTTTACGAATGTCT

>Abies\_hidalgensis\_SHL86

TTAACTTATTATACTCCTGAATATCAGACCAAAGATACGGATATCTTGGCGGCATTCCGA  
GTAACCTCCTCAACCTGGGGTGCCGCCCAGGAAGCGGGAGCAGCAGTAGCTGCTGAATCT  
TCCACCGGTACATGGACCACTGTTTGGACCGATGGACTTACCAGTCTTGATCGTTACAAA  
GGGCGATGCTATGACATCGAGCCCGTTCCTGGAGAGGAAAGTCAATTTATTGCCTATGTA  
GCTTACCCCTTAGACCTTTTCGAAGAAGGTTCTGTTACTAACTTGTTTACTTCCATTGTA

rbcL280218

GGTAATGTATTTGGATTCAAGGCCCTACGGGCTTTACGTTTGGAAGATTGCGGATTCCC  
CCTGCTTATTCCAAAACCTTTTCAAGGTCCACCTCATGGTATCCAAGTTGAAAGAGATAAA  
TTGAACAAATATGGCCGTCCTTTGTTGGGATGTACTATCAAACCAAAATTGGGTCTATCG  
GCTAAGAACTATGGTAGAGCAGTTTACGAATGTCT

>Abies\_religiosa\_ERI03

TTAACTTATTATACTCCTGAATATCAGACCAAAGATACGGATATCTTGGCGGCATTCCGA  
GTAACCTCCTCAACCTGGGGTGCCGCCCCGAGGAAGCGGGAGCAGCAGTAGCTGCTGAATCT  
TCCACCGGTACATGGACCACTGTTTGGACCGATGGACTTACCAGTCTTGATCGTTACAAA  
GGGCGATGCTATGACATCGAGCCCGTTCTGGAGAGGAAAGTCAATTTATTGCCTATGTA  
GCTTACCCCTTAGACCTTTTGAAGAAGGTTCTGTTACTAACTTGTTTACTTCCATTGTA  
GGTAATGTATTTGGATTCAAGGCCCTACGGGCTTTACGTTTGGAAGATTGCGGATTCCC  
CCTGCTTATTCCAAAACCTTTTCAAGGTCCACCTCATGGTATCCAAGTTGAAAGAGATAAA  
TTGAACAAATATGGCCGTCCTTTGTTGGGATGTACTATCAAACCAAAATTGGGTCTATCG  
GCTAAGAACTATGGTAGAGCAGTTTACGAATGTCT

>Abies\_religiosa\_SHL18

TTAACTTATTATACTCCTGAATATCAGACCAAAGATACGGATATCTTGGCGGCATTCCGA  
GTAACCTCCTCAACCTGGGGTGCCGCCCCGAGGAAGCGGGAGCAGCAGTAGCTGCTGAATCT  
TCCACCGGTACATGGACCACTGTTTGGACCGATGGACTTACCAGTCTTGATCGTTACAAA  
GGGCGATGCTATGACATCGAGCCCGTTCTGGAGAGGAAAGTCAATTTATTGCCTATGTA  
GCTTACCCCTTAGACCTTTTGAAGAAGGTTCTGTTACTAACTTGTTTACTTCCATTGTA  
GGTAATGTATTTGGATTCAAGGCCCTACGGGCTTTACGTTTGGAAGATTGCGGATTCCC  
CCTGCTTATTCCAAAACCTTTTCAAGGTCCACCTCATGGTATCCAAGTTGAAAGAGATAAA  
TTGAACAAATATGGCCGTCCTTTGTTGGGATGTACTATCAAACCAAAATTGGGTCTATCG  
GCTAAGAACTATGGTAGAGCAGTTTACGAATGTCT

>Callitropsis\_bentharii\_DSG717

TTAACTTATTATACTCCGGAATATCAGACCAAAGATACTGATATCTTGGCAGCATTCCGA  
GTCACTCCTCAACCTGGAGTGCCCCCGAAGAAGCGGGAGCAGCGGTAGCTGCCGAATCT  
TCCACTGGTACGTGGACCACTGTTTGGACCGATGGCCTTACCAGTCTTGATCGCTACAAG  
GGGCGATGCTATGATATTGAACCCGTTCTGGAGAAGAACTCAATTTATTGCCTATGTA  
GCTTACCCTTTAGACCTTTTGAAGAAGGCTCTGTGACTAACCTGTTTACTTCTATTGTA  
GGTAATGTATTTGGATTCAAAGCTTTACGGGCTCTACGTCTGGAAGATTACGAATTCCT  
CCTGCTTATTCAAAAACCTTTTCAAGGCCACCACATGGTATTCAAGTAGAAAGAGATAAA  
TTAAACAAATATGGTCGTCCTTTATTGGGATGTACTATCAAACCAAAATTGGGTCTATCT  
GCCAAGAATTATGGTAGAGCGGTTTATGAATGTCT

>Callitropsis\_bentharii\_SHL40

TTAACTTATTATACTCCGGAATATCAGACCAAAGATACTGATATCTTGGCAGCATTCCGA  
GTCACTCCTCAACCTGGAGTGCCCCCGAAGAAGCGGGAGCAGCGGTAGCTGCCGAATCT  
TCCACTGGTACGTGGACCACTGTTTGGACCGATGGCCTTACCAGTCTTGATCGCTACAAG  
GGGCGATGCTATGATATTGAACCCGTTCTGGAGAAGAACTCAATTTATTGCCTATGTA  
GCTTACCCTTTAGACCTTTTGAAGAAGGCTCTGTGACTAACCTGTTTACTTCTATTGTA  
GGTAATGTATTTGGATTCAAAGCTTTACGGGCTCTACGTCTGGAAGATTACGAATTCCT  
CCTGCTTATTCAAAAACCTTTTCAAGGCCACCACATGGTATTCAAGTAGAAAGAGATAAA  
TTAAACAAATATGGTCGTCCTTTATTGGGATGTACTATCAAACCAAAATTGGGTCTATCT  
GCCAAGAATTATGGTAGAGCGGTTTATGAATGTCT

>Callitropsis\_bentharii\_SHL82

TTAACTTATTATACTCCGGAATATCAGACCAAAGATACTGATATCTTGGCAGCATTCCGA

rbcL280218

GTCACCTCCTCAACCTGGAGTGCCCCCGAAGAAGCGGGAGCAGCGGTAGCTGCCGAATCT  
TCCACTGGTACGTGGACCACTGTTTGGACCGATGGCCTTACCAGTCTTGATCGCTACAAG  
GGGCGATGCTATGATATTGAACCCGTTCTGGAGAAGAACTCAATTTATTGCCTATGTA  
GCTTACCCTTTAGACCTTTTTGAAGAAGGCTCTGTGACTAACCTGTTTACTTCTATTGTA  
GGTAATGTATTTGGATTCAAAGCTTTACGGGCTCTACGTCTGGAAGATTACGAATTCCT  
CCTGCTTATTCAAAAACCTTTCAAGGCCACCACATGGTATTCAAGTAGAAAAGAGATAAA  
TTAAACAAATATGGTCGTCCTTTATTGGGATGTACTATCAAACCAAATTTGGGTCTATCT  
GCCAAGAATTATGGTAGAGCGGTTTATGAATGTCT

>Callitropsis\_lusitanica\_DSG722

TTAACTTATTATACTCCGGAATATCAGACCAAAGATACTGATATCTTGGCAGCATTCCGA  
GTCACCTCCTCAACCTGGAGTGCCCCCGAAGAAGCGGGAGCAGCGGTAGCTGCCGAATCT  
TCCACTGGTACGTGGACCACTGTTTGGACCGATGGCCTTACCAGTCTTGATCGCTACAAG  
GGGCGATGCTATGATATTGAACCCGTTCTGGAGAAGAACTCAATTTATTGCCTATGTA  
GCTTACCCTTTAGACCTTTTTGAAGAAGGCTCTGTGACTAACCTGTTTACTTCTATTGTA  
GGTAATGTATTTGGATTCAAAGCTTTACGGGCTCTACGTCTGGAAGATTACGAATTCCT  
CCTGCTTATTCAAAAACCTTTCAAGGCCACCACATGGTATTCAAGTAGAAAAGAGATAAA  
TTAAACAAATATGGTCGTCCTTTATTGGGATGTACTATCAAACCAAATTTGGGTCTATCT  
GCCAAGAATTATGGTAGAGCGGTTTATGAATGTCT

>Callitropsis\_lusitanica\_DSG723

TTAACTTATTATACTCCGGAATATCAGACCAAAGATACTGATATCTTGGCAGCATTCCGA  
GTCACCTCCTCAACCTGGAGTGCCCCCGAAGAAGCGGGAGCAGCGGTAGCTGCCGAATCT  
TCCACTGGTACGTGGACCACTGTTTGGACCGATGGCCTTACCAGTCTTGATCGCTACAAG  
GGGCGATGCTATGATATTGAACCCGTTCTGGAGAAGAACTCAATTTATTGCCTATGTA  
GCTTACCCTTTAGACCTTTTTGAAGAAGGCTCTGTGACTAACCTGTTTACTTCTATTGTA  
GGTAATGTATTTGGATTCAAAGCTTTACGGGCTCTACGTCTGGAAGATTACGAATTCCT  
CCTGCTTATTCAAAAACCTTTCAAGGCCACCACATGGTATTCAAGTAGAAAAGAGATAAA  
TTAAACAAATATGGTCGTCCTTTATTGGGATGTACTATCAAACCAAATTTGGGTCTATCT  
GCCAAGAATTATGGTAGAGCGGTTTATGAATGTCT

>Callitropsis\_lusitanica\_DSG724

TTAACTTATTATACTCCGGAATATCAGACCAAAGATACTGATATCTTGGCAGCATTCCGA  
GTCACCTCCTCAACCTGGAGTGCCCCCGAAGAAGCGGGAGCAGCGGTAGCTGCCGAATCT  
TCCACTGGTACGTGGACCACTGTTTGGACCGATGGCCTTACCAGTCTTGATCGCTACAAG  
GGGCGATGCTATGATATTGAACCCGTTCTGGAGAAGAACTCAATTTATTGCCTATGTA  
GCTTACCCTTTAGACCTTTTTGAAGAAGGCTCTGTGACTAACCTGTTTACTTCTATTGTA  
GGTAATGTATTTGGATTCAAAGCTTTACGGGCTCTACGTCTGGAAGATTACGAATTCCT  
CCTGCTTATTCAAAAACCTTTCAAGGCCACCACATGGTATTCAAGTAGAAAAGAGATAAA  
TTAAACAAATATGGTCGTCCTTTATTGGGATGTACTATCAAACCAAATTTGGGTCTATCT  
GCCAAGAATTATGGTAGAGCGGTTTATGAATGTCT

>Callitropsis\_lusitanica\_SHL119

TTAACTTATTATACTCCGGAATATCAGACCAAAGATACTGATATCTTGGCAGCATTCCGA  
GTCACCTCCTCAACCTGGAGTGCCCCCGAAGAAGCGGGAGCAGCGGTAGCTGCCGAATCT  
TCCACTGGTACGTGGACCACTGTTTGGACCGATGGCCTTACCAGTCTTGATCGCTACAAG  
GGGCGATGCTATGATATTGAACCCGTTCTGGAGAAGAACTCAATTTATTGCCTATGTA  
GCTTACCCTTTAGACCTTTTTGAAGAAGGCTCTGTGACTAACCTGTTTACTTCTATTGTA  
GGTAATGTATTTGGATTCAAAGCTTTACGGGCTCTACGTCTGGAAGATTACGAATTCCT  
CCTGCTTATTCAAAAACCTTTCAAGGCCACCACATGGTATTCAAGTAGAAAAGAGATAAA

TTAAACAAATATGGTCGTCCTTTATTGGGATGTACTATCAAACCAAATTTGGGTCTATCT  
GCCAAGAATTATGGTAGAGCGGTTTATGAATGTCT

>Callitropsis\_lusitanica\_SHL147

TTAACTTATTATACTCCGGAATATCAGACCAAAGATACTGATATCTTGGCAGCATTCCGA  
GTCACTCCTCAACCTGGAGTGCCCCCGAAGAAGCGGGAGCAGCGGTAGCTGCCGAATCT  
TCCACTGGTACGTGGACCACTGTTTGGACCGATGGCCTTACCAGTCTTGATCGCTACAAG  
GGGCGATGCTATGATATTGAACCCGTTCTGGAGAAGAACTCAATTTATTGCCTATGTA  
GCTTACCCTTTAGACCTTTTGAAGAAGGCTCTGTGACTAACCTGTTTACTTCTATTGTA  
GGTAATGTATTTGGATTCAAAGCTTTACGGGCTCTACGTCTGGAAGATTACGAATTCCT  
CCTGCTTATTCAAAAACCTTTTCAAGGCCACCACATGGTATTCAAGTAGAAAAGAGATAAA  
TTAAACAAATATGGTCGTCCTTTATTGGGATGTACTATCAAACCAAATTTGGGTCTATCT  
GCCAAGAATTATGGTAGAGCGGTTTATGAATGTCT

>Juniperus\_deppeana\_DSG417

TTAACTTATTATACTCCGGAATATCAGACCAAAGATACTGATATCTTGGCAGCATTCCGA  
GTCACTCCTCAACCTGGAGTGCCCCCGAAGAAGCGGGAGCAGCGGTAGCTGCCGAATCT  
TCCACTGGTACGTGGACCACTGTTTGGACCGATGGCCTTACCAGTCTTGATCGCTACAAG  
GGGCGATGCTATGATATTGAACCCGTTCTGGAGAAGAACTCAATTTATTGCCTATGTA  
GCTTACCCTTTAGACCTTTTGAAGAAGGCTCTGTGACTAACCTGTTTACTTCTATTGTA  
GGTAATGTATTTGGATTCAAAGCTTTACGGGCTCTACGTCTGGAAGATTACGAATTCCT  
CCTGCTTATTCAAAAACCTTTTCAAGGCCACCACATGGTATTCAAGTAGAAAAGAGATAAA  
TTAAACAAATATGGTCGTCCTTTATTGGGATGTACTATTAAACCAAATTTGGGTCTATCT  
GCCAAGAATTATGGTAGAGCGGTTTATGAATGTCT

>Juniperus\_deppeana\_SHL148

TTAACTTATTATACTCCGGAATATCAGACCAAAGATACTGATATCTTGGCAGCATTCCGA  
GTCACTCCTCAACCTGGAGTGCCCCCGAAGAAGCGGGAGCAGCGGTAGCTGCCGAATCT  
TCCACTGGTACGTGGACCACTGTTTGGACCGATGGCCTTACCAGTCTTGATCGCTACAAG  
GGGCGATGCTATGATATTGAACCCGTTCTGGAGAAGAACTCAATTTATTGCCTATGTA  
GCTTACCCTTTAGACCTTTTGAAGAAGGCTCTGTGACTAACCTGTTTACTTCTATTGTA  
GGTAATGTATTTGGATTCAAAGCTTTACGGGCTCTACGTCTGGAAGATTACGAATTCCT  
CCTGCTTATTCAAAAACCTTTTCAAGGCCACCACATGGTATTCAAGTAGAAAAGAGATAAA  
TTAAACAAATATGGTCGTCCTTTATTGGGATGTACTATTAAACCAAATTTGGGTCTATCT  
GCCAAGAATTATGGTAGAGCGGTTTATGAATGTCT

>Juniperus\_deppeana\_SHL19

TTAACTTATTATACTCCGGAATATCAGACCAAAGATACTGATATCTTGGCAGCATTCCGA  
GTCACTCCTCAACCTGGAGTGCCCCCGAAGAAGCGGGAGCAGCGGTAGCTGCCGAATCT  
TCCACTGGTACGTGGACCACTGTTTGGACCGATGGCCTTACCAGTCTTGATCGCTACAAG  
GGGCGATGCTATGATATTGAACCCGTTCTGGAGAAGAACTCAATTTATTGCCTATGTA  
GCTTACCCTTTAGACCTTTTGAAGAAGGCTCTGTGACTAACCTGTTTACTTCTATTGTA  
GGTAATGTATTTGGATTCAAAGCTTTACGGGCTCTACGTCTGGAAGATTACGAATTCCT  
CCTGCTTATTCAAAAACCTTTTCAAGGCCACCACATGGTATTCAAGTAGAAAAGAGATAAA  
TTAAACAAATATGGTCGTCCTTTATTGGGATGTACTATTAAACCAAATTTGGGTCTATCT  
GCCAAGAATTATGGTAGAGCGGTTTATGAATGTCT

>Juniperus\_flaccida\_SHL113

TTAACTTATTATACTCCGGAATATCAGACCAAAGATACTGATATCTTGGCAGCATTCCGA  
GTCACTCCTCAACCTGGAGTGCCCCCGAAGAAGCGGGAGCAGCGGTAGCTGCCGAATCT  
TCCACTGGTACGTGGACCACTGTTTGGACCGATGGCCTTACTAGTCTTGATCGCTACAAG

rbcL280218

GGGCGATGCTATGATATTGAACCCGTTCTGGAGAAGAACTCAATTTATTGCCTATGTA  
GCTTACCCTTTAGACCTTTTGAAGAAGGCTCTGTGACTAACCTGTTTACTTCTATTGTA  
GGTAATGTATTTGGATTCAAAGCTTTACGGGCTCTACGTCTGGAAGATTACGAATTCCT  
CCTGCTTATTCAAAAACCTTTTCAAGGCCACCACATGGTATTCAAGTAGAAAGAGATAAA  
TTAAACAAATATGGTCGTCCTTTATTGGGATGTACTATTAAACCAAAATTGGGTCTATCT  
GCCAAGAATTATGGTAGAGCGGTTTATGAATGTCT

>Juniperus\_flaccida\_SHL127

TTAACTTATTATACTCCGGAATATCAGACCAAAGATACTGATATCTTGGCAGCATTCCGA  
GTCACTCCTCAACCTGGAGTGCCCCCGAAGAAGCGGGAGCAGCGGTAGCTGCCGAATCT  
TCCACTGGTACGTGGACCACTGTTTGGACCGATGGCCTTACTAGTCTTGATCGCTACAAG  
GGGCGATGCTATGATATTGAACCCGTTCTGGAGAAGAACTCAATTTATTGCCTATGTA  
GCTTACCCTTTAGACCTTTTGAAGAAGGCTCTGTGACTAACCTGTTTACTTCTATTGTA  
GGTAATGTATTTGGATTCAAAGCTTTACGGGCTCTACGTCTGGAAGATTACGAATTCCT  
CCTGCTTATTCAAAAACCTTTTCAAGGCCACCACATGGTATTCAAGTAGAAAGAGATAAA  
TTAAACAAATATGGTCGTCCTTTATTGGGATGTACTATTAAACCAAAATTGGGTCTATCT  
GCCAAGAATTATGGTAGAGCGGTTTATGAATGTCT

>Juniperus\_flaccida\_SHL33

TTAACTTATTATACTCCGGAATATCAGACCAAAGATACTGATATCTTGGCAGCATTCCGA  
GTCACTCCTCAACCTGGAGTGCCCCCGAAGAAGCGGGAGCAGCGGTAGCTGCCGAATCT  
TCCACTGGTACGTGGACCACTGTTTGGACCGATGGCCTTACTAGTCTTGATCGCTACAAG  
GGGCGATGCTATGATATTGAACCCGTTCTGGAGAAGAACTCAATTTATTGCCTATGTA  
GCTTACCCTTTAGACCTTTTGAAGAAGGCTCTGTGACTAACCTGTTTACTTCTATTGTA  
GGTAATGTATTTGGATTCAAAGCTTTACGGGCTCTACGTCTGGAAGATTACGAATTCCT  
CCTGCTTATTCAAAAACCTTTTCAAGGCCACCACATGGTATTCAAGTAGAAAGAGATAAA  
TTAAACAAATATGGTCGTCCTTTATTGGGATGTACTATTAAACCAAAATTGGGTCTATCT  
GCCAAGAATTATGGTAGAGCGGTTTATGAATGTCT

>Juniperus\_flaccida\_SHL34

TTAACTTATTATACTCCGGAATATCAGACCAAAGATACTGATATCTTGGCAGCATTCCGA  
GTCACTCCTCAACCTGGAGTGCCCCCGAAGAAGCGGGAGCAGCGGTAGCTGCCGAATCT  
TCCACTGGTACGTGGACCACTGTTTGGACCGATGGCCTTACTAGTCTTGATCGCTACAAG  
GGGCGATGCTATGATATTGAACCCGTTCTGGAGAAGAACTCAATTTATTGCCTATGTA  
GCTTACCCTTTAGACCTTTTGAAGAAGGCTCTGTGACTAACCTGTTTACTTCTATTGTA  
GGTAATGTATTTGGATTCAAAGCTTTACGGGCTCTACGTCTGGAAGATTACGAATTCCT  
CCTGCTTATTCAAAAACCTTTTCAAGGCCACCACATGGTATTCAAGTAGAAAGAGATAAA  
TTAAACAAATATGGTCGTCCTTTATTGGGATGTACTATTAAACCAAAATTGGGTCTATCT  
GCCAAGAATTATGGTAGAGCGGTTTATGAATGTCT

>Juniperus\_monosperma\_SHL124

TTAACTTATTATACTCCGGAATATCAGACCAAAGATACTGATATCTTGGCAGCATTCCGA  
GTCACTCCTCAACCTGGAGTGCCCCCGAAGAAGCGGGAGCAGCGGTAGCTGCCGAATCT  
TCCACTGGTACGTGGACCACTGTTTGGACCGATGGCCTTACCAGTCTTGATCGCTACAAG  
GGGCGATGCTATGATATTGAACCCGTTCTGGAGAAGAACTCAATTTATTGCCTATGTA  
GCTTACCCTTTAGACCTTTTGAAGAAGGCTCTGTGACTAACCTGTTTACTTCTATTGTA  
GGTAATGTATTTGGATTCAAAGCTTTACGGGCTCTACGTCTGGAAGATTACGAATTCCT  
CCTGCTTATTCAAAAACCTTTTCAAGGCCACCACATGGTATTCAAGTAGAAAGAGATAAA  
TTAAACAAATATGGTCGTCCTTTATTGGGATGTACTATTAAACCAAAATTGGGTCTATCT  
GCCAAGAATTATGGTAGAGCGGTTTATGAATGTCT

>Juniperus\_monosperma\_SHL126

TTAACTTATTATACTCCGGAATATCAGACCAAAGATACTGATATCTTGGCAGCATTCCGA  
 GTCACCTCCTCAACCTGGAGTGCCCCCGAAGAAGCGGGAGCAGCGGTAGCTGCCGAATCT  
 TCCACTGGTACGTGGACCACTGTTTGGACCGATGGCCTTACCAGTCTTGATCGCTACAAG  
 GGGCGATGCTATGATATTGAACCCGTTCTGGAGAAGAACTCAATTTATTGCCTATGTA  
 GCTTACCCTTTAGACCTTTTTGAAGAAGGCTCTGTGACTAACCTGTTTACTTCTATTGTA  
 GGTAAATGTATTTGGATTCAAAGCTTTACGGGCTCTACGTCTGGAAGATTACGAATTCCT  
 CCTGCTTATTCAAAAACCTTTTCAAGGCCACCACATGGTATTCAAGTAGAAAGAGATAAA  
 TTAAACAAATATGGTCGTCCTTTATTGGGATGTACTATTAAACCAAATGGGTCTATCT  
 GCCAAGAATTATGGTAGAGCGGTTTATGAATGTCT

>Juniperus\_monticola\_DSG1223DSG719

TTAACTTATTATACTCCGGAATATCAGACCAAAGATACTGATATCTTGGCAGCATTCCGA  
 GTCACCTCCTCAACCTGGAGTGCCCCCGAAGAAGCGGGAGCAGCGGTAGCTGCCGAATCT  
 TCCACTGGTACGTGGACCACTGTTTGGACCGATGGCCTTACTAGTCTTGATCGCTACAAG  
 GGGCGATGCTATGATATTGAACCCGTTCTGGAGAAGAACTCAATTTATTGCCTATGTA  
 GCTTACCCTTTAGACCTTTTTGAAGAAGGCTCTGTGACTAACCTGTTTACTTCTATTGTA  
 GGTAAATGTATTTGGATTCAAAGCTTTACGGGCTCTACGTCTGGAAGATTACGAATTCCT  
 CCTGCTTATTCAAAAACCTTTTCAAGGCCACCACATGGTATTCAAGTAGAAAGAGATAAA  
 TTAAACAAATATGGTCGTCCTTTATTGGGATGTACTATTAAACCAAATGGGTCTATCT  
 GCCAAGAATTATGGTAGAGCGGTTTATGAATGTCT

>Pinus\_ayacahuite\_DSG1039

TTAACTTATTATACTCCTGAATATCAGACCAAAGATACGGATATCTTGGCAGCATTCCGA  
 GTAACCTCCTCAACCTGGGGTGCCAGCCGAGGAAGCGGGTGACAGTAGCTGCTGAATCT  
 TCCACCGGTACATGGACCACTGTTTGGACCGATGGACTTACTAGTCTCGATCGTTACAAG  
 GGGCGATGCTATGACATCGAGCCCGTTCTGGAGAGGAGAATCAATTTATTGCCTATGTA  
 GCTTACCCCTTAGACCTTTTGAAGAAGGTTCTGTTACTAACCTGTTCACTTCCATTGTA  
 GGTAAATGTATTTGGATTCAAGGCCCTACGGGCTCTACGTTTGAAGATTGCGGATTCCC  
 CCTTCTTATTCCAAAACCTTTTCAAGGTCCACCTCATGGTATCCAAGTTGAAAGAGATAAA  
 TTGAACAAATATGGTCGTCCTTTATTGGGATGTACTATCAAACCAAATGGGTCTATCA  
 GCCAAAAACTATGGTAGAGCAGTTTACGAATGTCT

>Pinus\_ayacahuite\_DSG413

TTAACTTATTATACTCCTGAATATCAGACCAAAGATACGGATATCTTGGCAGCATTCCGA  
 GTAACCTCCTCAACCTGGGGTGCCAGCCGAGGAAGCGGGTGACAGTAGCTGCTGAATCT  
 TCCACCGGTACATGGACCACTGTTTGGACCGATGGACTTACTAGTCTCGATCGTTACAAG  
 GGGCGATGCTATGACATCGAGCCCGTTCTGGAGAGGAGAATCAATTTATTGCCTATGTA  
 GCTTACCCCTTAGACCTTTTGAAGAAGGTTCTGTTACTAACCTGTTCACTTCCATTGTA  
 GGTAAATGTATTTGGATTCAAGGCCCTACGGGCTCTACGTTTGAAGATTGCGGATTCCC  
 CCTTCTTATTCCAAAACCTTTTCAAGGTCCACCTCATGGTATCCAAGTTGAAAGAGATAAA  
 TTGAACAAATATGGTCGTCCTTTATTGGGATGTACTATCAAACCAAATGGGTCTATCA  
 GCCAAAAACTATGGTAGAGCAGTTTACGAATGTCT

>Pinus\_ayacahuite\_SHL121

TTAACTTATTATACTCCTGAATATCAGACCAAAGATACGGATATCTTGGCAGCATTCCGA  
 GTAACCTCCTCAACCTGGGGTGCCAGCCGAGGAAGCGGGTGACAGTAGCTGCTGAATCT  
 TCCACCGGTACATGGACCACTGTTTGGACCGATGGACTTACTAGTCTCGATCGTTACAAG  
 GGGCGATGCTATGACATCGAGCCCGTTCTGGAGAGGAGAATCAATTTATTGCCTATGTA  
 GCTTACCCCTTAGACCTTTTGAAGAAGGTTCTGTTACTAACCTGTTCACTTCCATTGTA

rbcL280218

GGTAATGTATTTGGATTCAAGGCCCTACGGGCTCTACGTTTGGAAGATTGCGGATTCCC  
CCTTCTTATTCCAAAACCTTTTCAGGGTCCACCTCATGGTATCCAAGTTGAAAGAGATAAA  
TTGAACAAATATGGTCGTCCTTTATTGGGATGTACTATCAAACCAAATTGGGTCTATCA  
GCCAAAACTATGGTAGAGCAGTTTACGAATGTCT

>Pinus\_cembroides\_DSG444

TTAACTTATTATACTCCTGAATATCAGACCAAAGATACGGATATCTTGGCAGCATTCCGA  
GTAACCCCTCAACCTGGGGTGCCAGCCGAGGAAGCGGGTGCAGCAGTAGCTGCTGAATCT  
TCCACCGGTACATGGACCACTGTTTGGACCGATGGACTTACTAGTCTCGATCGTTACAAG  
GGGCGATGCTATGACATTGAGCCCGTTCCTGGAGAGGAGAGTCAATTTATTGCCTATGTA  
GCTTACCCCTTAGACCTTTTCGAAGAAGGTTCTGTTACTAACCTGTTCACTTCCATTGTA  
GGTAATGTATTTGGATTCAAGGCCCTACGGGCTCTACGTTTGGAAGATTGCGGATTCCC  
CCTGCTTATTCCAAAACCTTTTCAGGGGCCACCTCATGGTATCCAAGTTGAAAGAGATAAA  
TTGAACAAATATGGTCGTCCTTTATTGGGATGTACTATCAAACCAAATTGGGTCTATCA  
GCCAAAACTATGGTAGAGCAGTTTACGAATGTCT

>Pinus\_cembroides\_SHL36

TTAACTTATTATACTCCTGAATATCAGACCAAAGATACGGATATCTTGGCAGCATTCCGA  
GTAACCCCTCAACCTGGGGTGCCAGCCGAGGAAGCGGGTGCAGCAGTAGCTGCTGAATCT  
TCCACCGGTACATGGACCACTGTTTGGACCGATGGACTTACTAGTCTCGATCGTTACAAG  
GGGCGATGCTATGACATTGAGCCCGTTCCTGGAGAGGAGAGTCAATTTATTGCCTATGTA  
GCTTACCCCTTAGACCTTTTCGAAGAAGGTTCTGTTACTAACCTGTTCACTTCCATTGTA  
GGTAATGTATTTGGATTCAAGGCCCTACGGGCTCTACGTTTGGAAGATTGCGGATTCCC  
CCTGCTTATTCCAAAACCTTTTCAGGGGCCACCTCATGGTATCCAAGTTGAAAGAGATAAA  
TTGAACAAATATGGTCGTCCTTTATTGGGATGTACTATCAAACCAAATTGGGTCTATCA  
GCCAAAACTATGGTAGAGCAGTTTACGAATGTCT

>Pinus\_devoniana\_DSG449

TTAACTTATTATACTCCTGAATATCAGACCAAAGATACAGATATCTTGGCAGCATTCCGA  
GTAACCTCCTCAACCCGGGGTGCCACCTGAAGAAGCGGGAGCAGCAGTAGCTGCTGAATCT  
TCCACCGGTACATGGACCACTGTTTGGACCGATGGACTTACTAGTCTCGATCGTTACAAG  
GGGCGATGCTATGACATCGAGCCCGTTCCTGGAGAGGAGACTCAATTTATTGCCTATGTA  
GCTTACCCCTTAGACCTTTTCGAAGAAGGTTCTGTTACTAACTTGTTCACCTTCCATTGTA  
GGTAATGTATTTGGATTCAAGGCCCTACGGGCTCTACGTTTGGAAGATTGCGGATTCCC  
CCTGCTTATTCCAAAACCTTTTCAGGGTCCACCTCATGGTATCCAGGTTGAAAGAGATAAA  
TTGAACAAATATGGTCGTCCTTTATTGGGATGTACTATCAAACCAAATTGGGTCTATCA  
GCCAAAACTATGGTAGAGCAGTTTACGAATGTCT

>Pinus\_devoniana\_DSG521

TTAACTTATTATACTCCTGAATATCAGACCAAAGATACAGATATCTTGGCAGCATTCCGA  
GTAACCTCCTCAACCCGGGGTGCCACCTGAAGAAGCGGGAGCAGCAGTAGCTGCTGAATCT  
TCCACCGGTACATGGACCACTGTTTGGACCGATGGACTTACTAGTCTCGATCGTTACAAG  
GGGCGATGCTATGACATCGAGCCCGTTCCTGGAGAGGAGACTCAATTTATTGCCTATGTA  
GCTTACCCCTTAGACCTTTTCGAAGAAGGTTCTGTTACTAACTTGTTCACCTTCCATTGTA  
GGTAATGTATTTGGATTCAAGGCCCTACGGGCTCTACGTTTGGAAGATTGCGGATTCCC  
CCTGCTTATTCCAAAACCTTTTCAGGGTCCACCTCATGGTATCCAGGTTGAAAGAGATAAA  
TTGAACAAATATGGTCGTCCTTTATTGGGATGTACTATCAAACCAAATTGGGTCTATCA  
GCCAAAACTATGGTAGAGCAGTTTACGAATGTCT

>Pinus\_devoniana\_DSG677

TTAACTTATTATACTCCTGAATATCAGACCAAAGATACAGATATCTTGGCAGCATTCCGA

rbcL280218

GTAACCTCTCAACCCGGGGTGCCACCTGAAGAAGCGGGAGCAGCAGTAGCTGCTGAATCT  
TCCACCGGTACATGGACCACTGTTTGGACCGATGGACTTACTAGTCTCGATCGTTACAAG  
GGGCGATGCTATGACATCGAGCCCGTTCTGGAGAGGAGACTCAATTTATTGCCTATGTA  
GCTTACCCCTTAGACCTTTTCGAAGAAGGTTCTGTTACTAACTTGTTCACTTCCATTGTA  
GGTAATGTATTTGGATTCAAGGCCCTACGGGCTCTACGTTTGGAAGATTGCGGATTCCC  
CCTGCTTATTCCAAAACCTTTTCAGGGTCCACCTCATGGTATCCAGGTTGAAAGAGATAAA  
TTGAACAAATATGGTCGTCCTTTATTGGGATGTACTATCAAACCAAATTTGGGTCTATCA  
GCCAAAACTATGGTAGAGCAGTTTACGAATGTCT

>Pinus\_greggii\_DSG426

TTAACTTATTATACTCCTGAATATCAGACCAAGGATACAGATATCTTGGCAGCATTCCGA  
GTAACCTCTCAACCCGGGGTGCCACCTGAAGAAGCGGGAGCAGCAGTAGCTGCTGAATCT  
TCCACCGGTACATGGACCACTGTTTGGACCGATGGACTTACTAGTCTCGATCGTTACAAG  
GGGCGATGCTATGATATCGAGCCCGTTCTGGAGAGGAGACTCAATTTATTGCCTATGTA  
GCTTACCCCTTAGACCTTTTCGAAGAAGGTTCTGTTACTAACTTGTTCACTTCCATTGTA  
GGTAATGTATTTGGATTCAAGGCCCTACGGGCTCTACGTTTGGAAGATTGCGGATTCCC  
CCTGCTTATTCCAAAACCTTTTCAGGGTCCACCTCATGGTATCCAGGTTGAAAGAGATAAA  
TTGAACAAATATGGTCGTCCTTTATTGGGATGTACTATCAAACCAAATTTGGGTCTATCA  
GCCAAAACTATGGTAGAGCAGTTTACGAATGTCT

>Pinus\_greggii\_DSG506

TTAACTTATTATACTCCTGAATATCAGACCAAGGATACAGATATCTTGGCAGCATTCCGA  
GTAACCTCTCAACCCGGGGTGCCACCTGAAGAAGCGGGAGCAGCAGTAGCTGCTGAATCT  
TCCACCGGTACATGGACCACTGTTTGGACCGATGGACTTACTAGTCTCGATCGTTACAAG  
GGGCGATGCTATGATATCGAGCCCGTTCTGGAGAGGAGACTCAATTTATTGCCTATGTA  
GCTTACCCCTTAGACCTTTTCGAAGAAGGTTCTGTTACTAACTTGTTCACTTCCATTGTA  
GGTAATGTATTTGGATTCAAGGCCCTACGGGCTCTACGTTTGGAAGATTGCGGATTCCC  
CCTGCTTATTCCAAAACCTTTTCAGGGTCCACCTCATGGTATCCAGGTTGAAAGAGATAAA  
TTGAACAAATATGGTCGTCCTTTATTGGGATGTACTATCAAACCAAATTTGGGTCTATCA  
GCCAAAACTATGGTAGAGCAGTTTACGAATGTCT

>Pinus\_greggii\_DSG524

TTAACTTATTATACTCCTGAATATCAGACCAAGGATACAGATATCTTGGCAGCATTCCGA  
GTAACCTCTCAACCCGGGGTGCCACCTGAAGAAGCGGGAGCAGCAGTAGCTGCTGAATCT  
TCCACCGGTACATGGACCACTGTTTGGACCGATGGACTTACTAGTCTCGATCGTTACAAG  
GGGCGATGCTATGATATCGAGCCCGTTCTGGAGAGGAGACTCAATTTATTGCCTATGTA  
GCTTACCCCTTAGACCTTTTCGAAGAAGGTTCTGTTACTAACTTGTTCACTTCCATTGTA  
GGTAATGTATTTGGATTCAAGGCCCTACGGGCTCTACGTTTGGAAGATTGCGGATTCCC  
CCTGCTTATTCCAAAACCTTTTCAGGGTCCACCTCATGGTATCCAGGTTGAAAGAGATAAA  
TTGAACAAATATGGTCGTCCTTTATTGGGATGTACTATCAAACCAAATTTGGGTCTATCA  
GCCAAAACTATGGTAGAGCAGTTTACGAATGTCT

>Pinus\_greggii\_SHL137

TTAACTTATTATACTCCTGAATATCAGACCAAGGATACAGATATCTTGGCAGCATTCCGA  
GTAACCTCTCAACCCGGGGTGCCACCTGAAGAAGCGGGAGCAGCAGTAGCTGCTGAATCT  
TCCACCGGTACATGGACCACTGTTTGGACCGATGGACTTACTAGTCTCGATCGTTACAAG  
GGGCGATGCTATGATATCGAGCCCGTTCTGGAGAGGAGACTCAATTTATTGCCTATGTA  
GCTTACCCCTTAGACCTTTTCGAAGAAGGTTCTGTTACTAACTTGTTCACTTCCATTGTA  
GGTAATGTATTTGGATTCAAGGCCCTACGGGCTCTACGTTTGGAAGATTGCGGATTCCC  
CCTGCTTATTCCAAAACCTTTTCAGGGTCCACCTCATGGTATCCAGGTTGAAAGAGATAAA



TTGAACAAATATGGTCGTCCTTTATTGGGATGTACTATCAAACCAAATTGGGTCTATCA  
GCCAAAACTATGGTAGAGCAGTTTACGAATGTCT

>Pinus\_greggii\_SHL140

TTAACTTATTATACTCCTGAATATCAGACCAAGGATACAGATATCTTGGCAGCATTCCGA  
GTAACCTCTCAACCCGGGGTGCCACCTGAAGAAGCGGGAGCAGCAGTAGCTGCTGAATCT  
TCCACCGGTACATGGACCACTGTTTGGACCGATGGACTTACTAGTCTCGATCGTTACAAG  
GGGCGATGCTATGATATCGAGCCCGTTCCTGGAGAGGAGACTCAATTTATTGCCTATGTA  
GCTTACCCCTTAGACCTTTTCGAAGAAGGTTCTGTTACTAACTTGTTCACTTCCATTGTA  
GGTAATGTATTTGGATTCAAGGCCCTACGGGCTCTACGTTTGAAGATTGCGGATTCCC  
CCTGCTTATTCCAAAACCTTTTCAGGGTCCACCTCATGGTATCCAGGTTGAAAGAGATAAA  
TTGAACAAATATGGTCGTCCTTTATTGGGATGTACTATCAAACCAAATTGGGTCTATCA  
GCCAAAAaCTATGGTAGAGCAGTTTACGAATGTCT

>Pinus\_greggii\_SHL142

TTAACTTATTATACTCCTGAATATCAGACCAAGGATACAGATATCTTGGCAGCATTCCGA  
GTAACCTCTCAACCCGGGGTGCCACCTGAAGAAGCGGGAGCAGCAGTAGCTGCTGAATCT  
TCCACCGGTACATGGACCACTGTTTGGACCGATGGACTTACTAGTCTCGATCGTTACAAG  
GGGCGATGCTATGATATCGAGCCCGTTCCTGGAGAGGAGACTCAATTTATTGCCTATGTA  
GCTTACCCCTTAGACCTTTTCGAAGAAGGTTCTGTTACTAACTTGTTCACTTCCATTGTA  
GGTAATGTATTTGGATTCAAGGCCCTACGGGCTCTACGTTTGAAGATTGCGGATTCCC  
CCTGCTTATTCCAAAACCTTTTCAGGGTCCACCTCATGGTATCCAGGTTGAAAGAGATAAA  
TTGAACAAATATGGTCGTCCTTTATTGGGATGTACTATCAAACCAAATTGGGTCTATCA  
GCCAAAAACTATGGTAGAGCAGTTTACGAATGTCT

>Pinus\_hartwegii\_DSG613

TTAACTTATTATACTCCTGAATATCAGACCAAAGATACAGATATCTTGGCAGCATTCCGA  
GTAACCTCTCAACCCGGGGTGCCACCTGAAGAAGCGGGAGCAGCAGTAGCTGCTGAATCT  
TCCACCGGTACATGGACCACTGTTTGGACCGATGGACTTACTAGTCTCGATCGTTACAAG  
GGGCGATGCTATGACATCGAGCCCGTTCCTGGAGAGGAGACTCAATTTATTGCCTATGTA  
GCTTACCCCTTAGACCTTTTCGAAGAAGGTTCTGTTACTAACTTGTTCACTTCCATTGTA  
GGTAATGTATTTGGATTCAAGGCCCTACGGGCTCTACGTTTGAAGATTGCGGATTCCC  
CCTGCTTATTCCAAAACCTTTTCAGGGTCCACCTCATGGTATCCAGGTTGAAAGAGATAAA  
TTGAACAAATATGGTCGTCCTTTATTGGGATGTACTATCAAACCAAATTGGGTCTATCA  
GCCAAAAACTATGGTAGAGCAGTTTACGAATGTCT

>Pinus\_hartwegii\_DSG616

TTAACTTATTATACTCCTGAATATCAGACCAAAGATACAGATATCTTGGCAGCATTCCGA  
GTAACCTCTCAACCCGGGGTGCCACCTGAAGAAGCGGGAGCAGCAGTAGCTGCTGAATCT  
TCCACCGGTACATGGACCACTGTTTGGACCGATGGACTTACTAGTCTCGATCGTTACAAG  
GGGCGATGCTATGACATCGAGCCCGTTCCTGGAGAGGAGACTCAATTTATTGCCTATGTA  
GCTTACCCCTTAGACCTTTTCGAAGAAGGTTCTGTTACTAACTTGTTCACTTCCATTGTA  
GGTAATGTATTTGGATTCAAGGCCCTACGGGCTCTACGTTTGAAGATTGCGGATTCCC  
CCTGCTTATTCCAAAACCTTTTCAGGGTCCACCTCATGGTATCCAGGTTGAAAGAGATAAA  
TTGAACAAATATGGTCGTCCTTTATTGGGATGTACTATCAAACCAAATTGGGTCTATCA  
GCCAAAAACTATGGTAGAGCAGTTTACGAATGTCT

>Pinus\_hartwegii\_SHL149

TTAACTTATTATACTCCTGAATATCAGACCAAAGATACAGATATCTTGGCAGCATTCCGA  
GTAACCTCTCAACCCGGGGTGCCACCTGAAGAAGCGGGAGCAGCAGTAGCTGCTGAATCT  
TCCACCGGTACATGGACCACTGTTTGGACCGATGGACTTACTAGTCTCGATCGTTACAAG

rbcL280218

GGGCGATGCTATGACATCGAGCCCGTTCTGGAGAGGAGACTCAATTTATTGCCTATGTA  
GCTTACCCCTTAGACCTTTTCGAAGAAGGTTCTGTTACTAACTTGTTCACTTCCATTGTA  
GGTAATGTATTTGGATTCAAGGCCCTACGGGCTCTACGTTTGGAAGATTGCGGATTCCC  
CCTGCTTATTCCAAAACCTTTTCAGGGTCCACCTCATGGTATCCAGGTTGAAAGAGATAAA  
TTGAACAAATATGGTCGTCCTTTATTGGGATGTACTATCAAACCAAATTTGGGTCTATCA  
GCCAAAACCTATGGTAGAGCAGTTTACGAATGTCT

>Pinus\_leiophylla\_DSG611

TTAACTTATTATACTCCTGAATATCAGACCAAGGATACAGATATCTTGGCAGCATTCCGA  
GTAACCTCTCAACCCGGGGTGCCACCTGAAGAAGCGGGAGCAGCAGTAGCTGCTGAATCT  
TCCACCGGTACATGGACCACTGTTTGGACCGATGGACTTACTAGTCTCGATCGTTACAAG  
GGGCGATGCTATGATATCGAGCCCGTTCTGGAGAGGAGACTCAATTTATTGCCTATGTA  
GCTTACCCCTTAGACCTTTTCGAAGAAGGTTCTGTTACTAACTTGTTCACTTCCATTGTA  
GGTAATGTATTTGGATTCAAGGCCCTACGGGCTCTACGTTTGGAAGATTGCGGATTCCC  
CCTGCTTATTCCAAAACCTTTTCAGGGTCCACCTCATGGTATCCAGGTTGAAAGAGATAAA  
TTGAACAAATATGGTCGTCCTTTATTGGGATGTACTATCAAACCAAATTTGGGTCTATCA  
GCCAAAACCTATGGTAGAGCAGTTTACGAATGTCT

>Pinus\_leiophylla\_DSG619

TTAACTTATTATACTCCTGAATATCAGACCAAGGATACAGATATCTTGGCAGCATTCCGA  
GTAACCTCTCAACCCGGGGTGCCACCTGAAGAAGCGGGAGCAGCAGTAGCTGCTGAATCT  
TCCACCGGTACATGGACCACTGTTTGGACCGATGGACTTACTAGTCTCGATCGTTACAAG  
GGGCGATGCTATGATATCGAGCCCGTTCTGGAGAGGAGACTCAATTTATTGCCTATGTA  
GCTTACCCCTTAGACCTTTTCGAAGAAGGTTCTGTTACTAACTTGTTCACTTCCATTGTA  
GGTAATGTATTTGGATTCAAGGCCCTACGGGCTCTACGTTTGGAAGATTGCGGATTCCC  
CCTGCTTATTCCAAAACCTTTTCAGGGTCCACCTCATGGTATCCAGGTTGAAAGAGATAAA  
TTGAACAAATATGGTCGTCCTTTATTGGGATGTACTATCAAACCAAATTTGGGTCTATCA  
GCCAAAACCTATGGTAGAGCAGTTTACGAATGTCT

>Pinus\_leiophylla\_SHL22

TTAACTTATTATACTCCTGAATATCAGACCAAGGATACAGATATCTTGGCAGCATTCCGA  
GTAACCTCTCAACCCGGGGTGCCACCTGAAGAAGCGGGAGCAGCAGTAGCTGCTGAATCT  
TCCACCGGTACATGGACCACTGTTTGGACCGATGGACTTACTAGTCTCGATCGTTACAAG  
GGGCGATGCTATGATATCGAGCCCGTTCTGGAGAGGAGACTCAATTTATTGCCTATGTA  
GCTTACCCCTTAGACCTTTTCGAAGAAGGTTCTGTTACTAACTTGTTCACTTCCATTGTA  
GGTAATGTATTTGGATTCAAGGCCCTACGGGCTCTACGTTTGGAAGATTGCGGATTCCC  
CCTGCTTATTCCAAAACCTTTTCAGGGTCCACCTCATGGTATCCAGGTTGAAAGAGATAAA  
TTGAACAAATATGGTCGTCCTTTATTGGGATGTACTATCAAACCAAATTTGGGTCTATCA  
GCCAAAACCTATGGTAGAGCAGTTTACGAATGTCT

>Pinus\_montezumae\_DSG416

TTAACTTATTATACTCCTGAATATCAGACCAAGGATACAGATATCTTGGCAGCATTCCGA  
GTAACCTCTCAACCCGGGGTGCCACCTGAAGAAGCGGGAGCAGCAGTAGCTGCTGAATCT  
TCCACCGGTACATGGACCACTGTTTGGACCGATGGACTTACTAGTCTCGATCGTTACAAG  
GGGCGATGCTATGACATCGAGCCCGTTCTGGAGAGGAGACTCAATTTATTGCCTATGTA  
GCTTACCCCTTAGACCTTTTCGAAGAAGGTTCTGTTACTAACTTGTTCACTTCCATTGTA  
GGTAATGTATTTGGATTCAAGGCCCTACGGGCTCTACGTTTGGAAGATTGCGGATTCCC  
CCTGCTTATTCCAAAACCTTTTCAGGGTCCACCTCATGGTATCCAGGTTGAAAGAGATAAA  
TTGAACAAATATGGTCGTCCTTTATTGGGATGTACTATCAAACCAAATTTGGGTCTATCA  
GCCAAAACCTATGGTAGAGCAGTTTACGAATGTCT

>Pinus\_montezumae\_SHL150

TTAACTTATTATACTCCTGAATATCAGACCAAAGATACAGATATCTTGGCAGCATTCCGA  
GTAACCTCCTCAACCCGGGGTGCCACCTGAAGAAGCGGGAGCAGCAGTAGCTGCTGAATCT  
TCCACCGGTACATGGACCACTGTTTGGACCGATGGACTTACTAGTCTCGATCGTTACAAG  
GGGCGATGCTATGACATCGAGCCCGTTCTGGAGAGGAGACTCAATTTATTGCCTATGTA  
GCTTACCCCTTAGACCTTTTCGAAGAAGGTTCTGTTACTAACTTGTTCACTTCCATTGTA  
GGTAATGTATTTGGATTCAAGGCCCTACGGGCTCTACGTTTGGAAGATTGCGGATTCCC  
CCTGCTTATTCCAAAACCTTTTCAGGGTCCACCTCATGGTATCCAGGTTGAAAGAGATAAA  
TTGAACAAATATGGTCGTCCTTTATTGGGATGTACTATCAAACCAAATTGGGTCTATCA  
GCCAAAACTATGGTAGAGCAGTTTACGAATGTCT

>Pinus\_montezumae\_SHL155

TTAACTTATTATACTCCTGAATATCAGACCAAAGATACAGATATCTTGGCAGCATTCCGA  
GTAACCTCCTCAACCCGGGGTGCCACCTGAAGAAGCGGGAGCAGCAGTAGCTGCTGAATCT  
TCCACCGGTACATGGACCACTGTTTGGACCGATGGACTTACTAGTCTCGATCGTTACAAG  
GGGCGATGCTATGACATCGAGCCCGTTCTGGAGAGGAGACTCAATTTATTGCCTATGTA  
GCTTACCCCTTAGACCTTTTCGAAGAAGGTTCTGTTACTAACTTGTTCACTTCCATTGTA  
GGTAATGTATTTGGATTCAAGGCCCTACGGGCTCTACGTTTGGAAGATTGCGGATTCCC  
CCTGCTTATTCCAAAACCTTTTCAGGGTCCACCTCATGGTATCCAGGTTGAAAGAGATAAA  
TTGAACAAATATGGTCGTCCTTTATTGGGATGTACTATCAAACCAAATTGGGTCTATCA  
GCCAAAACTATGGTAGAGCAGTTTACGAATGTCT

>Pinus\_oocarpa\_DSG711

TTAACTTATTATACTCCTGAATATCAGACCAAGGATACAGATATCTTGGCAGCATTCCGA  
GTAACCTCCTCAACCCGGGGTGCCACCTGAAGAAGCGGGAGCAGCAGTAGCTGCTGAATCT  
TCCACCGGTACATGGACCACTGTTTGGACCGATGGACTTACTAGTCTCGATCGTTACAAG  
GGGCGATGCTATGATATCGAGCCCGTTCTGGAGAGGAGACTCAATTTATTGCCTATGTA  
GCTTACCCCTTAGACCTTTTCGAAGAAGGTTCTGTTACTAACTTGTTCACTTCCATTGTA  
GGTAATGTATTTGGATTCAAGGCCCTACGGGCTCTACGTTTGGAAGATTGCGGATTCCC  
CCTGCTTATTCCAAAACCTTTTCAGGGTCCACCTCATGGTATCCAGGTTGAAAGAGATAAA  
TTGAACAAATATGGTCGTCCTTTATTGGGATGTACTATCAAACCAAATTGGGTCTATCA  
GCCAAAACTATGGTAGAGCAGTTTACGAATGTCT

>Pinus\_oocarpa\_SHL138

TTAACTTATTATACTCCTGAATATCAGACCAAGGATACAGATATCTTGGCAGCATTCCGA  
GTAACCTCCTCAACCCGGGGTGCCACCTGAAGAAGCGGGAGCAGCAGTAGCTGCTGAATCT  
TCCACCGGTACATGGACCACTGTTTGGACCGATGGACTTACTAGTCTCGATCGTTACAAG  
GGGCGATGCTATGATATCGAGCCCGTTCTGGAGAGGAGACTCAATTTATTGCCTATGTA  
GCTTACCCCTTAGACCTTTTCGAAGAAGGTTCTGTTACTAACTTGTTCACTTCCATTGTA  
GGTAATGTATTTGGATTCAAGGCCCTACGGGCTCTACGTTTGGAAGATTGCGGATTCCC  
CCTGCTTATTCCAAAACCTTTTCAGGGTCCACCTCATGGTATCCAGGTTGAAAGAGATAAA  
TTGAACAAATATGGTCGTCCTTTATTGGGATGTACTATCAAACCAAATTGGGTCTATCA  
GCCAAAACTATGGTAGAGCAGTTTACGAATGTCT

>Pinus\_oocarpa\_SHL145

TTAACTTATTATACTCCTGAATATCAGACCAAGGATACAGATATCTTGGCAGCATTCCGA  
GTAACCTCCTCAACCCGGGGTGCCACCTGAAGAAGCGGGAGCAGCAGTAGCTGCTGAATCT  
TCCACCGGTACATGGACCACTGTTTGGACCGATGGACTTACTAGTCTCGATCGTTACAAG  
GGGCGATGCTATGATATCGAGCCCGTTCTGGAGAGGAGACTCAATTTATTGCCTATGTA  
GCTTACCCCTTAGACCTTTTCGAAGAAGGTTCTGTTACTAACTTGTTCACTTCCATTGTA

rbcL280218

GGTAATGTATTTGGATTCAAGGCCCTACGGGCTCTACGTTTGGAAGATTGCGGATTCCC  
CCTGCTTATTCCAAAACCTTTTCAGGGTCCACCTCATGGTATCCAGGTTGAAAGAGATAAA  
TTGAACAAATATGGTCGTCCTTTATTGGGATGTACTATCAAACCAAATTGGGTCTATCA  
GCCAAAACTATGGTAGAGCAGTTTACGAATGTCT

>Pinus\_oocarpa\_SHL146

TTAACTTATTATACTCCTGAATATCAGACCAAGGATACAGATATCTTGGCAGCATTCCGA  
GTAACCTCTCAACCCGGGGTGCCACCTGAAGAAGCGGGAGCAGCAGTAGCTGCTGAATCT  
TCCACCGGTACATGGACCACTGTTTGGACCGATGGACTTACTAGTCTCGATCGTTACAAG  
GGGCGATGCTATGATATCGAGCCCGTTCTGGAGAGGAGACTCAATTTATTGCCTATGTA  
GCTTACCCCTTAGACCTTTTCGAAGAAGGTTCTGTTACTAACTTGTTCACTTCCATTGTA  
GGTAATGTATTTGGATTCAAGGCCCTACGGGCTCTACGTTTGGAAGATTGCGGATTCCC  
CCTGCTTATTCCAAAACCTTTTCAGGGTCCACCTCATGGTATCCAGGTTGAAAGAGATAAA  
TTGAACAAATATGGTCGTCCTTTATTGGGATGTACTATCAAACCAAATTGGGTCTATCA  
GCCAAAACTATGGTAGAGCAGTTTACGAATGTCT

>Pinus\_patula\_DSG1038

TTAACTTATTATACTCCTGAATATCAGACCAAGGATACAGATATCTTGGCAGCATTCCGA  
GTAACCTCTCAACCCGGGGTGCCACCTGAAGAAGCGGGAGCAGCAGTAGCTGCTGAATCT  
TCCACCGGTACATGGACCACTGTTTGGACCGATGGACTTACTAGTCTCGATCGTTACAAG  
GGGCGATGCTATGATATCGAGCCCGTTCTGGAGAGGAGACTCAATTTATTGCCTATGTA  
GCTTACCCCTTAGACCTTTTCGAAGAAGGTTCTGTTACTAACTTGTTCACTTCCATTGTA  
GGTAATGTATTTGGATTCAAGGCCCTACGGGCTCTACGTTTGGAAGATTGCGGATTCCC  
CCTGCTTATTCCAAAACCTTTTCAGGGTCCACCTCATGGTATCCAGGTTGAAAGAGATAAA  
TTGAACAAATATGGTCGTCCTTTATTGGGATGTACTATCAAACCAAATTGGGTCTATCA  
GCCAAAACTATGGTAGAGCAGTTTACGAATGTCT

>Pinus\_patula\_DSG408

TTAACTTATTATACTCCTGAATATCAGACCAAGGATACAGATATCTTGGCAGCATTCCGA  
GTAACCTCTCAACCCGGGGTGCCACCTGAAGAAGCGGGAGCAGCAGTAGCTGCTGAATCT  
TCCACCGGTACATGGACCACTGTTTGGACCGATGGACTTACTAGTCTCGATCGTTACAAG  
GGGCGATGCTATGATATCGAGCCCGTTCTGGAGAGGAGACTCAATTTATTGCCTATGTA  
GCTTACCCCTTAGACCTTTTCGAAGAAGGTTCTGTTACTAACTTGTTCACTTCCATTGTA  
GGTAATGTATTTGGATTCAAGGCCCTACGGGCTCTACGTTTGGAAGATTGCGGATTCCC  
CCTGCTTATTCCAAAACCTTTTCAGGGTCCACCTCATGGTATCCAGGTTGAAAGAGATAAA  
TTGAACAAATATGGTCGTCCTTTATTGGGATGTACTATCAAACCAAATTGGGTCTATCA  
GCCAAAACTATGGTAGAGCAGTTTACGAATGTCT

>Pinus\_patula\_SHL144

TTAACTTATTATACTCCTGAATATCAGACCAAGGATACAGATATCTTGGCAGCATTCCGA  
GTAACCTCTCAACCCGGGGTGCCACCTGAAGAAGCGGGAGCAGCAGTAGCTGCTGAATCT  
TCCACCGGTACATGGACCACTGTTTGGACCGATGGACTTACTAGTCTCGATCGTTACAAG  
GGGCGATGCTATGATATCGAGCCCGTTCTGGAGAGGAGACTCAATTTATTGCCTATGTA  
GCTTACCCCTTAGACCTTTTCGAAGAAGGTTCTGTTACTAACTTGTTCACTTCCATTGTA  
GGTAATGTATTTGGATTCAAGGCCCTACGGGCTCTACGTTTGGAAGATTGCGGATTCCC  
CCTGCTTATTCCAAAACCTTTTCAGGGTCCACCTCATGGTATCCAGGTTGAAAGAGATAAA  
TTGAACAAATATGGTCGTCCTTTATTGGGATGTACTATCAAACCAAATTGGGTCTATCA  
GCCAAAACTATGGTAGAGCAGTTTACGAATGTCT

>Pinus\_patula\_SHL30

TTAACTTATTATACTCCTGAATATCAGACCAAGGATACAGATATCTTGGCAGCATTCCGA

rbcL280218

GTAACCTCTCAACCCGGGGTGCCACCTGAAGAAGCGGGAGCAGCAGTAGCTGCTGAATCT  
TCCACCGGTACATGGACCACTGTTTGGACCGATGGACTTACTAGTCTCGATCGTTACAAG  
GGGCGATGCTATGATATCGAGCCCGTTCCTGGAGAGGAGACTCAATTTATTGCCTATGTA  
GCTTACCCCTTAGACCTTTTCGAAGAAGGTTCTGTTACTAACTTGTTCACTTCCATTGTA  
GGTAATGTATTTGGATTCAAGGCCCTACGGGCTCTACGTTTGGAAGATTGCGGATTCCC  
CCTGCTTATTCCAAAACCTTTTCAGGGTCCACCTCATGGTATCCAGGTTGAAAGAGATAAA  
TTGAACAAATATGGTCGTCCTTTATTGGGATGTACTATCAAACCAAATTTGGGTCTATCA  
GCCAAAACTATGGTAGAGCAGTTTACGAATGTCT

>Pinus\_pinceana\_DSG440

TTAACATATTATACTCCTGAATATCAGACCAAAGATACGGATATCTTGGCAGCATTCCGA  
GTAACCTCTCAACCTGGGGTGCCAGCCGAGGAAGCGGGTGACGAGTAGCTGCTGAATCT  
TCCACCGGTACATGGACCACTGTTTGGACCGATGGACTTACTAGTCTCGATCGTTACAAG  
GGGCGATGCTATGACATTGAGCCCGTTCCTGGAGAGGAGACTCAATTTATTGCCTATGTA  
GCTTACCCCTTAGACCTTTTCGAAGAAGGTTCTGTTACTAACCTGTTCACTTCCATTGTA  
GGTAATGTATTTGGATTCAAGGCCCTACGGGCTCTACGTTTGGAAGATTGCGGATTCCC  
CCTTCTTATTCCAAAACCTTTTCAGGGGCCACCTCATGGTATCCAAGTTGAAAGAGATAAA  
TTGAACAAATATGGTCGTCCTTTATTGGGATGTACTATCAAACCAAATTTGGGTCTATCA  
GCCAAAACTATGGTAGAGCAGTTTACGAATGTCT

>Pinus\_pinceana\_DSG441

TTAACATATTATACTCCTGAATATCAGACCAAAGATACGGATATCTTGGCAGCATTCCGA  
GTAACCTCTCAACCTGGGGTGCCAGCCGAGGAAGCGGGTGACGAGTAGCTGCTGAATCT  
TCCACCGGTACATGGACCACTGTTTGGACCGATGGACTTACTAGTCTCGATCGTTACAAG  
GGGCGATGCTATGACATTGAGCCCGTTCCTGGAGAGGAGACTCAATTTATTGCCTATGTA  
GCTTACCCCTTAGACCTTTTCGAAGAAGGTTCTGTTACTAACCTGTTCACTTCCATTGTA  
GGTAATGTATTTGGATTCAAGGCCCTACGGGCTCTACGTTTGGAAGATTGCGGATTCCC  
CCTTCTTATTCCAAAACCTTTTCAGGGGCCACCTCATGGTATCCAAGTTGAAAGAGATAAA  
TTGAACAAATATGGTCGTCCTTTATTGGGATGTACTATCAAACCAAATTTGGGTCTATCA  
GCCAAAACTATGGTAGAGCAGTTTACGAATGTCT

>Pinus\_pinceana\_SHL53

TTAACATATTATACTCCTGAATATCAGACCAAAGATACGGATATCTTGGCAGCATTCCGA  
GTAACCTCTCAACCTGGGGTGCCAGCCGAGGAAGCGGGTGACGAGTAGCTGCTGAATCT  
TCCACCGGTACATGGACCACTGTTTGGACCGATGGACTTACTAGTCTCGATCGTTACAAG  
GGGCGATGCTATGACATTGAGCCCGTTCCTGGAGAGGAGACTCAATTTATTGCCTATGTA  
GCTTACCCCTTAGACCTTTTCGAAGAAGGTTCTGTTACTAACCTGTTCACTTCCATTGTA  
GGTAATGTATTTGGATTCAAGGCCCTACGGGCTCTACGTTTGGAAGATTGCGGATTCCC  
CCTTCTTATTCCAAAACCTTTTCAGGGGCCACCTCATGGTATCCAAGTTGAAAGAGATAAA  
TTGAACAAATATGGTCGTCCTTTATTGGGATGTACTATCAAACCAAATTTGGGTCTATCA  
GCCAAAACTATGGTAGAGCAGTTTACGAATGTCT

>Pinus\_pseudostrobus\_DSG631

TTAACTTATTATACTCCTGAATATCAGACCAAAGATACAGATATCTTGGCAGCATTCCGA  
GTAACCTCTCAACCCGGGGTGCCACCTGAAGAAGCGGGAGCAGCAGTAGCTGCTGAATCT  
TCCACCGGTACATGGACCACTGTTTGGACCGATGGACTTACTAGTCTCGATCGTTACAAG  
GGGCGATGCTATGACATCGAGCCCGTTCCTGGAGAGGAGACTCAATTTATTGCCTATGTA  
GCTTACCCCTTAGACCTTTTCGAAGAAGGTTCTGTTACTAACTTGTTCACTTCCATTGTA  
GGTAATGTATTTGGATTCAAGGCCCTACGGGCTCTACGTTTGGAAGATTGCGGATTCCC  
CCTGCTTATTCCAAAACCTTTTCAGGGTCCACCTCATGGTATCCAGGTTGAAAGAGATAAA

rbcL280218

TTGAACAAATATGGTCGTCCTTTATTGGGATGTACTATCAAACCAAATTGGGTCTATCA  
GCCAAAACTATGGTAGAGCAGTTTACGAATGTCT

>Pinus\_pseudostrobus\_SHL123

TAACTTATTATACTCCTGAATATCAGACCAAAGATACAGATATCTTGGCAGCATTCCGA  
GTAACCTCTCAACCCGGGGTGCCACCTGAAGAAGCGGGAGCAGCAGTAGCTGCTGAATCT  
TCCACCGGTACATGGACCACTGTTTGGACCGATGGACTTACTAGTCTCGATCGTTACAAG  
GGGCGATGCTATGACATCGAGCCCGTTCTGGAGAGGAGACTCAATTTATTGCCTATGTA  
GCTTACCCCTTAGACCTTTTCGAAGAAGGTTCTGTTACTAACTTGTTCACTTCCATTGTA  
GGTAATGTATTTGGATTCAAGGCCCTACGGGCTCTACGTTTGAAGATTGCGGATTCCC  
CCTGCTTATTCCAAAACCTTTTCAGGGTCCACCTCATGGTATCCAGGTTGAAAGAGATAAA  
TTGAACAAATATGGTCGTCCTTTATTGGGATGTACTATCAAACCAAATTGGGTCTATCA  
GCCAAAACTATGGTAGAGCAGTTTACGAATGTCT

>Pinus\_pseudostrobus\_SHL130

TAACTTATTATACTCCTGAATATCAGACCAAAGATACAGATATCTTGGCAGCATTCCGA  
GTAACCTCTCAACCCGGGGTGCCACCTGAAGAAGCGGGAGCAGCAGTAGCTGCTGAATCT  
TCCACCGGTACATGGACCACTGTTTGGACCGATGGACTTACTAGTCTCGATCGTTACAAG  
GGGCGATGCTATGACATCGAGCCCGTTCTGGAGAGGAGACTCAATTTATTGCCTATGTA  
GCTTACCCCTTAGACCTTTTCGAAGAAGGTTCTGTTACTAACTTGTTCACTTCCATTGTA  
GGTAATGTATTTGGATTCAAGGCCCTACGGGCTCTACGTTTGAAGATTGCGGATTCCC  
CCTGCTTATTCCAAAACCTTTTCAGGGTCCACCTCATGGTATCCAGGTTGAAAGAGATAAA  
TTGAACAAATATGGTCGTCCTTTATTGGGATGTACTATCAAACCAAATTGGGTCTATCA  
GCCAAAACTATGGTAGAGCAGTTTACGAATGTCT

>Pinus\_pseudostrobus\_SHL25

TAACTTATTATACTCCTGAATATCAGACCAAAGATACAGATATCTTGGCAGCATTCCGA  
GTAACCTCTCAACCCGGGGTGCCACCTGAAGAAGCGGGAGCAGCAGTAGCTGCTGAATCT  
TCCACCGGTACATGGACCACTGTTTGGACCGATGGACTTACTAGTCTCGATCGTTACAAG  
GGGCGATGCTATGACATCGAGCCCGTTCTGGAGAGGAGACTCAATTTATTGCCTATGTA  
GCTTACCCCTTAGACCTTTTCGAAGAAGGTTCTGTTACTAACTTGTTCACTTCCATTGTA  
GGTAATGTATTTGGATTCAAGGCCCTACGGGCTCTACGTTTGAAGATTGCGGATTCCC  
CCTGCTTATTCCAAAACCTTTTCAGGGTCCACCTCATGGTATCCAGGTTGAAAGAGATAAA  
TTGAACAAATATGGTCGTCCTTTATTGGGATGTACTATCAAACCAAATTGGGTCTATCA  
GCCAAAACTATGGTAGAGCAGTTTACGAATGTCT

>Pinus\_teocote\_DSG410

TAACTTATTATACTCCTGAATATCAGACCAAAGGATACAGATATCTTGGCAGCATTCCGA  
GTAACCTCTCAACCCGGGGTGCCACCTGAAGAAGCGGGAGCAGCAGTAGCTGCTGAATCT  
TCCACCGGTACATGGACCACTGTTTGGACCGATGGACTTACTAGTCTCGATCGTTACAAG  
GGGCGATGCTATGATATCGAGCCCGTTCTGGAGAGGAGACTCAATTTATTGCCTATGTA  
GCTTACCCCTTAGACCTTTTCGAAGAAGGTTCTGTTACTAACTTGTTCACTTCCATTGTA  
GGTAATGTATTTGGATTCAAGGCCCTACGGGCTCTACGTTTGAAGATTGCGGATTCCC  
CCTGCTTATTCCAAAACCTTTTCAGGGTCCACCTCATGGTATCCAGGTTGAAAGAGATAAA  
TTGAACAAATATGGTCGTCCTTTATTGGGATGTACTATCAAACCAAATTGGGTCTATCA  
GCCAAAACTATGGTAGAGCAGTTTACGAATGTCT

>Pinus\_teocote\_SHL20

TAACTTATTATACTCCTGAATATCAGACCAAAGGATACAGATATCTTGGCAGCATTCCGA  
GTAACCTCTCAACCCGGGGTGCCACCTGAAGAAGCGGGAGCAGCAGTAGCTGCTGAATCT  
TCCACCGGTACATGGACCACTGTTTGGACCGATGGACTTACTAGTCTCGATCGTTACAAG

rbcL280218

GGGCGATGCTATGATATCGAGCCCGTTCTGGAGAGGAGACTCAATTTATTGCCTATGTA  
GCTTACCCCTTAGACCTTTTCGAAGAAGGTTCTGTTACTAACTTGTTCACTTCCATTGTA  
GGTAATGTATTTGGATTCAAGGCCCTACGGGCTCTACGTTTGGAAGATTGCGGATTCCC  
CCTGCTTATTCCAAAACCTTTTCAGGGTCCACCTCATGGTATCCAGGTTGAAAGAGATAAA  
TTGAACAAATATGGTCGTCCTTTATTGGGATGTACTATCAAACCAAATTTGGGTCTATCA  
GCCAAAACTATGGTAGAGCAGTTTACGAATGTCT

>Pinus\_teocote\_SHL29

TTAACTTATTATACTCCTGAATATCAGACCAAGGATACAGATATCTTGGCAGCATTCCGA  
GTAACCTCTCAACCCGGGGTGCCACCTGAAGAAGCGGGAGCAGTAGCTGCTGAATCT  
TCCACCGGTACATGGACCACTGTTTGGACCGATGGACTTACTAGTCTCGATCGTTACAAG  
GGGCGATGCTATGATATCGAGCCCGTTGCTGGAGAGGAGACTCAATTTATTGCCTATGTA  
GCTTACCCCTTAGACCTTTTCGAAGAAGGTTCTGTTACTAACTTGTTCACTTCCATTGTA  
GGTAATGTATTTGGATTCAAGGCCCTACGGGCTCTACGTTTGGAAGATTGCGGATTCCC  
CCTGCTTATTCCAAAACCTTTTCAGGGTCCACCTCATGGTATCCAGGTTGAAAGAGATAAA  
TTGAACAAATATGGTCGTCCTTTATTGGGATGTACTATCAAACCAAATTTGGGTCTATCA  
GCCAAAACTATGGTAGAGCAGTTTACGAATGTCT

>Podocarpus\_matudae\_SHL106

TTAACTTATTATACTCCgCAaTATCAgACCAAGATACTGATATCTTGGCAGCATTCCGA  
gTCACTCCTCAACCCGAGTGCCCCCGAGGAAGCaGGAGCgGCAGTAGCTGCCGAATCT  
TCCACTGGTACaTGGACTACTGTTTGGACcGATGGACTTACCAGCCTcGATCGTTAcAAG  
GGgCGgTGCTATGAcAtcGAACCTGTTCTGGAGAgGAAAATCAATTTATTGCcTATGTA  
GCTTATCCCTaGAcCTTTtGAAgAAGGTTCTGTTACTAaCCTGTTcAcCTCcaTTGTA  
GGTAaTGTTTTGGATTtAAAGCCcTACGGGCTCTACGCTTGGAAGATcTGCGAATTCCCT  
CCTGCTTATTCCAAAACCTTTcCAaGGtCCaCCaCaTGGtAtCCaGGTgGAAAGAGATAAA  
TTaAAtAAATATGGcCGCccCTTATTGGGATGTACCATCAAACCAAaTTGGGTCTGTCT  
GCaAAgAATTATGGTAGAGCaGTtTAcGAaTGCTCT

>Podocarpus\_matudae\_SHL45

TTAACTTATTATACTCCGCAATATCAGACCAAAGATACTGATATCTTGGCAGCATTCCGA  
GTCACTCCTCAACCCGAGTGCCCCCGAGGAAGCAGGAGCGGCAGTAGCTGCCGAATCT  
TCCACTGGTACATGGACTACTGTTTGGACCGATGGACTTACCAGCCTCGATCGTTACAAG  
GGGCGGTGCTATGACATCGAACCTGTTCTGGAGAGGAAAATCAATTTATTGCCTATGTA  
GCTTATCCCTTAGACCTTTTGAAGAAGGTTCTGTTACTAACCTGTTACCTCCATTGTA  
GGTAATGTTTTGGATTtAAAGCCCTACGGGCTCTACGCTTGGAAGATCTGCGAATTCCCT  
CCTGCTTATTCCAAAACCTTTCCAAGGTCCACCACATGGTATCCAGGTGGAAGAGATAAA  
TTAAATAAATATGGCCGCCCTTATTGGGATGTACCATCAAACCAAaTTGGGTCTGTCT  
GCAAAGAATTATGGTAGAGCAGTTTACGAATGTCT

>Pseudotsuga\_menziesii\_DSG774

TTAACTTATTATACTCCTGAATATCAGACCAAAGATACGGATATCTTGGCAGCATTCCGA  
GTAACCTCTCAACCTGGGGTGCCACCCGAGGAAGCGGGAGCAGTAGCTGCTGAATCT  
TCCACCGGTACATGGACCACTGTTTGGACCGATGGACTTACTAGTCTTGATCGTTACAAG  
GGACGATGCTATGACATCGAGGCCGTTCTGGAGAGGAGAGTCAATTTATTGCCTATGTA  
GCTTACCCCTTAGACCTTTTCGAAGAAGGTTCTGTTACTAACTTGTTCACTTCCATTGTA  
GGTAATGTATTTGGATTCAAGGCCCTACGGGCTCTACGTTTGGAAGATTGCGGATCCCC  
CCTGCTTATTCCAAAACCTTTCAAGGTCCACCTCATGGTATCCAAGTTGAAAGGGATAAA  
TTGAACAAATATGGCCGTCCTTTATTGGGATGTACTATCAAACCAAaTTGGGTCTATCG  
GCTAAGAACTATGGTAGAGCAGTTTACGAATGTCT

>Pseudotsuga\_menziesii\_SHL133

TTAACTTATTATACTCCTGAATATCAGACCAAAGATACGGATATCTTGGCAGCATTCCGA  
GTAACCTCCTCAACCTGGGGTGCCACCCGAGGAAGCGGGAGCAGCAGTAGCTGCTGAATCT  
TCCACCGGTACATGGACCACTGTTTGGACCGATGGACTTACTAGTCTTGATCGTTACAAG  
GGACGATGCTATGACATCGAGGCCGTTCTGAGAGGAGAGTCAATTTATTGCCTATGTA  
GCTTACCCCTTAGACCTTTTCGAAGAAGGTTCTGTTACTAACTTGTTCACTTCCATTGTA  
GGTAATGTATTTGGATTCAAGGCCCTACGGGCTCTACGTTTGGAAGATTGCGGATCCCC  
CCTGCTTATTCCAAAACCTTTCAAGGTCCACCTCATGGTATCCAAGTTGAAAGGGATAAA  
TTGAACAAATATGGCCGTCCTTTATTGGGATGTACTATCAAACCAAATTGGGTCTATCG  
GCTAAGAACTATGGTAGAGCAGTTTACGAATGTCT

>Pseudotsuga\_menziesii\_SHL75

TTAACTTATTATACTCCTGAATATCAGACCAAAGATACGGATATCTTGGCAGCATTCCGA  
GTAACCTCCTCAACCTGGGGTGCCACCCGAGGAAGCGGGAGCAGCAGTAGCTGCTGAATCT  
TCCACCGGTACATGGACCACTGTTTGGACCGATGGACTTACTAGTCTTGATCGTTACAAG  
GGACGATGCTATGACATCGAGGCCGTTCTGAGAGGAGAGTCAATTTATTGCCTATGTA  
GCTTACCCCTTAGACCTTTTCGAAGAAGGTTCTGTTACTAACTTGTTCACTTCCATTGTA  
GGTAATGTATTTGGATTCAAGGCCCTACGGGCTCTACGTTTGGAAGATTGCGGATCCCC  
CCTGCTTATTCCAAAACCTTTCAAGGTCCACCTCATGGTATCCAAGTTGAAAGGGATAAA  
TTGAACAAATATGGCCGTCCTTTATTGGGATGTACTATCAAACCAAATTGGGTCTATCG  
GCTAAGAACTATGGTAGAGCAGTTTACGAATGTCT

>Taxus\_globosa\_APO02

CTAACTTATTATACTCCACAATATCAGACCAAAGATACTGATATCTTGGCAGCATTCCGA  
GTCACTCCTCAACCGGGAGTGCCCCCGAGGAAGCGGGAGCAGCAGTAGCTGCCGAATCT  
TCCACTGGTACATGGACCACTGTTTGGACCGATGGACTTACCAGTCTTGATCGTTACAAG  
GGACGATGCTATGATATCGAACCCGTTCTGAGAGGAAAAGTCAATTTATTGCCTATGTA  
GCTTACCCCTTAGATCTTTTCGAAGAAGGTTCTGTGACTAACCTGTTCACTTCCATTGTA  
GGTAATGTCTTTGGATTCAAAGCCCTACGAGCTCTACGTCTGGAAGATCTACGAATTCCT  
CCTGCTTATTCAAAAACCTTTCCAAGGCCACCACATGGTATCCAAGTGGAAGAGATAAA  
TTAAACAAATATGGTCGTCCTTTGCTGGGATGTACTATAAAACCAAATTGGGCCTATCT  
GCCAAAAATTATGGTAGAGCCGTTTACGAATGTCT

>Taxus\_globosa\_DSG772414

CTAACTTATTATACTCCACAATATCAGACCAAAGATACTGATATCTTGGCAGCATTCCGA  
GTCACTCCTCAACCGGGAGTGCCCCCGAGGAAGCGGGAGCAGCAGTAGCTGCCGAATCT  
TCCACTGGTACATGGACCACTGTTTGGACCGATGGACTTACCAGTCTTGATCGTTACAAG  
GGACGATGCTATGATATCGAACCCGTTCTGAGAGGAAAAGTCAATTTATTGCCTATGTA  
GCTTACCCCTTAGATCTTTTCGAAGAAGGTTCTGTGACTAACCTGTTCACTTCCATTGTA  
GGTAATGTCTTTGGATTCAAAGCCCTACGAGCTCTACGTCTGGAAGATCTACGAATTCCT  
CCTGCTTATTCAAAAACCTTTCCAAGGCCACCACATGGTATCCAAGTGGAAGAGATAAA  
TTAAACAAATATGGTCGTCCTTTGCTGGGATGTACTATAAAACCAAATTGGGCCTATCT  
GCCAAAAATTATGGTAGAGCCGTTTACGAATGTCT

>Taxus\_globosa\_SHL79

CTAACTTATTATACTCCACAATATCAGACCAAAGATACTGATATCTTGGCAGCATTCCGA  
GTCACTCCTCAACCGGGAGTGcCcCCCGACGAAGCGGGAGCAGCAGTAGCTGCCGAATCT  
TCCACTgGTACATGGACCACTGTTTGGACCGATGGACTTACCAGTCTTGATCGTtACAAG  
GGACGATGCTATGATATCGAACCCGTTcCTGAGAGGAAAAGTCAATTTATTGCCTATGTA  
GCTTACCCCTTAGATCTTTTCGAAGAAGGTTCTGTGACTAACCTGTTCACTTCCATTGTA



rbcL280218

GGTAATGTCTTTGGATTCAAAGCCCTACGAGCTCTACGTCTGGAAGATCTACGAATTCCT  
CCTGCTTATTCAAAAACCTTTCCAAGGCCACCACATGGTATCCAAGTGGAAGAGATAAA  
TTAAACAAATATGGTCGTCCTTTGCTGGGATGTACTATAAAACCAAATTGGGCCTATCT  
GCCAAAAATTATGGTAGAGCCGTTTACGAATGTCT

>Taxodium\_mucronatum\_SHL241

TTAACTTATTATACTCCGGAATATCAGACCAAAGATACTGATATCTTAGCAGCATTCCGA  
GTCACTCCTCAACCTGGAGTACCCCCGAAGAAGCGGGAGCAGCAGTAGCCGCCGAATCT  
TCCACTGGTACGTGGACGACTGTTTGGACCGATGGACTTACCAGTCTTGATCGTTACAAG  
GGGCGATGCTATGATATTGAACCCCTTCCTGGAGAGGAAAGTCAATTTATTGCCTATGTA  
GCTTACCCTTTAGATCTTTTTGAAGAAGGTTCTGTTACTAACCTGTTCACTTCTATTGTA  
GGTAATGTATTTGGATTCAAAGCCTTACGGGCTCTACGTCTGGAAGATTACGAATTCCT  
CCTGCTTATTCAAAAACCTTTCCAAGGCCACCACATGGTATTCAAGTAGAAAGAGATAAA  
TTAAACAAATATGGTCGTCCTTTGTTGGGATGTACTATAAAACCAAATTGGGTCTATCT  
GCCAAGAATTATGGTAGAGCGGTTTATGAATGTCT

>Taxodium\_mucronatum\_SHL26

TTAACTTATTATACTCCGGAATATCAGACCAAAGATACTGATATCTTAGCAGCATTCCGA  
GTCACTCCTCAACCTGGAGTACCCCCGAAGAAGCGGGAGCAGCAGTAGCCGCCGAATCT  
TCCACTGGTACGTGGACGACTGTTTGGACCGATGGACTTACCAGTCTTGATCGTTACAAG  
GGGCGATGCTATGATATTGAACCCCTTCCTGGAGAGGAAAGTCAATTTATTGCCTATGTA  
GCTTACCCTTTAGATCTTTTTGAAGAAGGTTCTGTTACTAACCTGTTCACTTCTATTGTA  
GGTAATGTATTTGGATTCAAAGCCTTACGGGCTCTACGTCTGGAAGATTACGAATTCCT  
CCTGCTTATTCAAAAACCTTTCCAAGGCCACCACATGGTATTCAAGTAGAAAGAGATAAA  
TTAAACAAATATGGTCGTCCTTTGTTGGGATGTACTATAAAACCAAATTGGGTCTATCT  
GCCAAGAATTATGGTAGAGCGGTTTATGAATGTCT

>Taxodium\_mucronatum\_SHL35

TTAACTTATTATACTCCGGAATATCAGACCAAAGATACTGATATCTTAGCAGCaTTCCGA  
GTCACTCCTCAACCTGGAGTACCCCCGAAGAAGCGGGAGCAGCAGTAGCCGCCGAATCT  
TCCACTGGTACGTGGACGACTGTTTGGACCGATGGACTTACCAGTCTTGATCGTTACAAG  
GGGCGATGCTATGATATTGAACCCCTTCCTGGAGAGGAAAGTCAATTTATTGCCTATGTA  
GCTTACCCTTTAGATCTTTTTGAAGAAGGTTCTGTTACTAACCTGTTCACTTCTATTGTA  
GGTAATGTATTTGGATTCAAAGCCTTACGGGCTCTACGTCTGGAAGATTACGAATTCCT  
CCTGCTTATTCAAAAACCTTTCCAAGGCCACCACATGGTATTCAAGTAGAAAGAGATAAA  
TTAAACAAATATGGTCGTCCTTTGTTGGGATGTACTATAAAACCAAATTGGGTCTATCT  
GCCAAGAATTATGGTAGAGCGGTTTATGAATGTCT

>Ginkgo\_biloba\_JN867578.1

TTGACTTATTATACTCCTGAATATCAAACCAAAGATACTGATATCTTGGCAGCATTCCGA  
GTAACCTCCTCAACCTGGAGTGCCACCTGAGGAAGCGGGAGCTGCAGTAGCTGCCGAATCT  
TCCACTGGTACATGGACCACTGTTTGGACCGATGGACTTACCAGTCTTGATCGTTACAAG  
GGAAGATGCTATGACATCGAGCCCGTTCTGGGGAGGAAAATCAATTTATTGCCTATGTA  
GCTTACCCTTTGGATCTTTTCGAGGAAGGTTCTGTTACTAACCTGTTCACTTCCATTGTA  
GGGAATGTATTTGGATTCAAAGCCCTACGAGCTCTACGTCTGGAAGATCTGCGAATTCCT  
CCTGCTTATTCAAAAACCTTTCCAGGGTCCACCTCATGGTATCCAAGTTGAAAGGGATAAA  
TTGAATAAATATGGCCGTCCCCTATTGGGATGTACTATCAAGCCAAAATTGGGTTTATCT  
GCCAAAAATTATGGTAGAGCAGTTTACGAATGTCT

>Ginkgo\_biloba\_KP099648.1

TTGACTTATTATACTCCTGAATATCAAACCAAAGATACTGATATCTTGGCAGCATTCCGA

rbcL280218

GTAATCCTCAACCTGGAGTGCCACCTGAGGAAGCGGGAGCTGCAGTAGCTGCCGAATCT  
TCCACTGGTACATGGACCACTGTTTGGACCGATGGACTTACCAGTCTTGATCGTTACAAG  
GGAAGATGCTATGACATCGAGCCCGTTCCTGGGGAGGAAAATCAATTTATTGCCTATGTA  
GCTTACCCTTTGGATCTTTTCGAGGAAGGTTCTGTTACTAACCTGTTCACTTCCATTGTA  
GGGAATGTATTTGGATTCAAAGCCCTACGAGCTCTACGTCTGGAAGATCTGCGAATTCCT  
CCTGCTTATTCCAAAACCTTCCAGGGTCCACCTCATGGTATCCAAGTTGAAAGGGATAAA  
TTGAATAAATATGGCCGTCCCCTATTGGGATGTACTATCAAGCCAAAATTGGGTTTATCT  
GCCAAAAATTATGGTAGAGCAGTTTACGAATGTCT
