# Supplementary material
Source: publisher figshare collection journal article supplement (https://tandf.figshare.com/articles/dataset/_/7604762)
Supplement: Supplementary file 2 [file 1]

>Abies\_guatemalensis\_DSG625

TTTCGTCGCTGGATCCGAGATGCTCCCTCCTTGACCCATTACGATCTGTTCTCTATAAA  
TA-----TCGAAATAGTCCAGATAATTTACAAAGATCAATTATTATCGCCCCGAGAGTA  
AATACAAGATTCTTGCTGTTCCCTGTGGAATCATTATGTCTATGGATGTGAATCCATTCTA  
GTTCCCTTCTTAAACGATCCTTTCATCCACGATCGTCGTCTCATGGATCTTCCCTGAT  
CGAACTCATTTTGATCGAAAGATCAAACATATTATCAGAAATTCTCGT---CGAAATTCA  
CTGAAAAGTATCTGGTCGTTGAAGGATCCTAGAATTCATGTTAGATATGCAGAAAGA  
TCTATTATAGCTATAAAGGGTACTCATCTCCTAGTGAAAAAATGTAGATATCATCTTCCA  
ATTTTTCGGCAATTTTATTTCCATCTTTGGTCCGAACCATATAGGGTATGTTCTCATCAA  
TTATCCAA---GAATTGTTCTTCTTCTTAGGTTATTTTCTGAGGGTTCGGATGAAACCT  
CTTCTGGTCAGGACCAAAATGCTAGATGAGTTATTCATTACCGATCTTATTACCGATGAA  
TTTGATCCAATAGTTCGGATTGTACCAATAATTGGATTATTGGCTAGAGAAAAATTATGT  
GACATATCAGGGCGGCCAATTAGTAAATTGTATTGGACTAGTCTAACAGATGATGATATC  
CTCGATCGATTGATCGAATTTGGAAAAATATTTTTCATTACTACAGTGGATCCCTTGAT  
CGAGATGGTTTATATCGTATAAAGTATATACT

>Abies\_guatemalensis\_DSG626

TTTCGTCGCTGGATCCGAGATGCTCCCTCCTTGACCCATTACGATCTGTTCTCTATAAA  
TA-----TCGAAATAGTCCAGATAATTTACAAAGATCAATTATTATCGCCCCGAGAGTA  
AATACAAGATTCTTGCTGTTCCCTGTGGAATCATTATGTCTATGGATGTGAATCCATTCTA  
GTTCCCTTCTTAAACGATCCTTTCATCCACGATCGTCGTCTCATGGATCTTCCCTGAT  
CGAACTCATTTTGATCGAAAGATCAAACATATTATCAGAAATTCTCGT---CGAAATTCA  
CTGAAAAGTATCTGGTCGTTGAAGGATCCTAGAATTCATGTTAGATATGCAGAAAGA  
TCTATTATAGCTATAAAGGGTACTCATCTCCTAGTGAAAAAATGTAGATATCATCTTCCA  
ATTTTTCGGCAATTTTATTTCCATCTTTGGTCCGAACCATATAGGGTATGTTCTCATCAA  
TTATCCAA---GAATTGTTCTTCTTCTTAGGTTATTTTCTGAGGGTTCGGATGAAACCT  
CTTCTGGTCAGGACCAAAATGCTAGATGAGTTATTCATTACCGATCTTATTACCGATGAA  
TTTGATCCAATAGTTCGGATTGTACCAATAATTGGATTATTGGCTAGAGAAAAATTATGT  
GACATATCAGGGCGGCCAATTAGTAAATTGTATTGGACTAGTCTAACAGATGATGATATC  
CTCGATCGATTGATCGAATTTGGAAAAATATTTTTCATTACTACAGTGGATCCCTTGAT  
CGAGATGGTTTATATCGTATAAAGTATATACT

>Abies\_guatemalensis\_DSG628

TTTCGTCGCTGGATCCGAGATGCTCCCTCCTTGACCCATTACGATCTGTTCTCTATAAA  
TA-----TCGAAATAGTCCAGATAATTTACAAAGATCAATTATTATCGCCCCGAGAGTA  
AATACAAGATTCTTGCTGTTCCCTGTGGAATCATTATGTCTATGGATGTGAATCCATTCTA  
GTTCCCTTCTTAAACGATCCTTTCATCCACGATCGTCGTCTCATGGATCTTCCCTGAT  
CGAACTCATTTTGATCGAAAGATCAAACATATTATCAGAAATTCTCGT---CGAAATTCA  
CTGAAAAGTATCTGGTCGTTGAAGGATCCTAGAATTCATGTTAGATATGCAGAAAGA  
TCTATTATAGCTATAAAGGGTACTCATCTCCTAGTGAAAAAATGTAGATATCATCTTCCA  
ATTTTTCGGCAATTTTATTTCCATCTTTGGTCCGAACCATATAGGGTATGTTCTCATCAA  
TTATCCAA---GAATTGTTCTTCTTCTTAGGTTATTTTCTGAGGGTTCGGATGAAACCT  
CTTCTGGTCAGGACCAAAATGCTAGATGAGTTATTCATTACCGATCTTATTACCGATGAA  
TTTGATCCAATAGTTCGGATTGTACCAATAATTGGATTATTGGCTAGAGAAAAATTATGT  
GACATATCAGGGCGGCCAATTAGTAAATTGTATTGGACTAGTCTAACAGATGATGATATC  
CTCGATCGATTGATCGAATTTGGAAAAATATTTTTCATTACTACAGTGGATCCCTTGAT  
CGAGATGGTTTATATCGTATAAAGTATATACT

>Abies\_guatemalensis\_SHL117

matK280218

ttTCGTCGCTgGATCCGAGATGCTCCCTCCTTGACCCATTACGATCTGTTCTCTATAAA  
TA-----TCGAaATAGTCCAGATAATTTACAAAGATCAATTATtATCGCCCCGAGAGTA  
AATACAAGATTCTTGCTGTTCCCTGTGGAATCATTATGTCTATGGATGTGAATCCATTCTA  
GTTCCCTTCTTAAACGATCCTTTTCATCCACGATCGTCGTCTCATGGATCTTTCCCTGAT  
CGAACTCATTTTGATCGAAAGATCAAACATATTATCAGAAATTCTCGT---CGAAATTCA  
CTGAAAAGTATCTGGTCGTTGAAGGATCCTAGAATTCACTATGTTAGATATGCAGAAAGA  
TCTATTATAGCTATAAAGGGTACTCATCTCCTAGTGAAAAAATGTAGATATCATCTTCCA  
ATTTTTCGGCAATTTTATTTCCATCTTTGGTCCGAACCATATAGGGTATGTTCTCATCAA  
TTATCCAA---GAATTGTTCTTCTTCTTAGGTTATTTTCTGAGGGTTCGGATGAAACCT  
CTTCTGGTCAGGACCAAAATGCTAGATGAGTTATTCATTACCGATCTTATTACCGATGAA  
TTTGATCCAATAGTTCGATTGTACCAATAATTGGATTATTGGCTAGAGAAAAATTATGT  
GACATATCAGGGCGGCCAATTAGTAAATTGTATTGGACTAGTCTAACAGATGATGATATC  
CTCGATCGATTGATCGAATTTGGAAAAATATTTTTCATTACTACAGTGGATCCCTTGAT  
CGAGATGGTTTATATCGTATAAAGTATATACT

>Abies\_hidalgensis\_SHL86

TTTCGtCGCTGGATCCGAGATGCTCCCTCCTTGCaCCCATTACGATCTGTTCTcTATAAA  
TA-----TCGAAATAgTCCAGATAATTTACAAAGATCAATTATTATCGCCCCGAGAGTa  
AATACAAGATTCTTGCTGTTCCCTGTGGAATCaTATGtCTATGGATGTGAATCCATTCTA  
GTTCCCTTCTTAAACGATCCTTTTCATCCACGATCGTCGTCTCATGGATCTTTCCCTGAT  
CGAACTCATTTTGATCGAAAGATCAAcATaTTATCaGAAATTCTCGt---cgAAATTCa  
CTGAAAAGTATCTGGTCGTTGAAGGATCCTAGaAATTCATGTTaGATATGCAGAAAGA  
TCTATTATAGCTATAAAGGGTACTCATCTCCTAGtGAAAAAATGTaGATATCATCTTCCA  
ATTTTTCGGCAATTTTATTTCCATCTTTGGTCCGAACCATATAGGGTATGTTCTCATCAA  
TTATCCAA---GAATTGTTCTTCTTCTTAGGTTATTTTCTGAGGGtTCGGATGAAACCT  
CTTCTGGTCAGGACCAaaATGCTagATGAgTTATTCaTTACCGATCTTaTTACCGATGAA  
TTTGATCCaaTAgTCCgATTGTaCCaaTAATTGGATtATTGGCTAGAGAAaAAaTTATGT  
GACaTATCAGGGCGGCCAATTAGtAAATTGTATTGGACTAGTCTAACAGAtGATGATATC  
CTCgATCgATTGATCGaATTGGAAaAATATTTTTCATTACTACaGtGgATCCCTTGAt  
CGAGATGGtTtATATCGTATaaAGTATATACT

>Abies\_religiosa\_ERI03

tTTCGTCGCTGGATCCGaGAtGCTcCCTCCTTGACCCATTACGATCTGTTCTCTATAAA  
TA-----TCGAAATAGTCCAGATAATTTACAAAGATCAATTATTATCGCCCCGAGAGTA  
AATACAAGATTCTTGCTGTTCCCTGTGGAATCATTATGTCTATGGATGTGAATCCATTCTA  
GTTCCCTTCTTAAACGATCCTTTTCATCCACGATCGTCGTCTCATGGATCTTTCCCTGAT  
CGAACTCATTTTGATCGAAAGATCAAACATATTATCAGAAATTCTCGT---CGAAATTCA  
CTGAAAAGTATCTGGTCGTTGAAGGATCCTAGAATTCATGTTAGATATGCAGAAAGA  
TCTATTATAGCTATAAAGGGTACTCATCTCCTAGTGAAAAAATGTAGATATCATCTTCCA  
ATTTTTCGGCAATTTTATTTCCATCTTTGGTCCGAACCATATAGGGTATGTTCTCATCAA  
TTATCCAA---GAATTGTTCTTCTTCTTAGGTTATTTTCTGAGGGTTCGGATGAAACCT  
CTTCTGGTCAGGACCAAAATGCTAGATGAGTTATTCATTACCGATCTTATTACCGATGAA  
TTTGATCCAATAGTTCGATTGTACCAATAATTGGATTATTGGCTAGAGAAAAATTATGT  
GACATATCAGGGCGGCCAATTAGTAAATTGTATTGGACTAGTCTAACAGATGATGATATC  
CTCGATCGATTGATCGAATTTGGAAAAATATTTTTCATTACTACAGTGGATCCCTTGAT  
CGAGATGGTTTATATCGTATAAAGTATATACT

>Abies\_religiosa\_SHL18

TtTCGTCGCTGGATCCGAGATGCTCCCTCCTTGACCCATTACGATCTGTTCTCTATAAA

matK280218

TA-----TCGAAATAGTCCAGATAATTTACAAAGATCAATTATTATCGCCCCGAGAGTA  
AATACAAGATTCTTGCTGTTCCCTGTGGAATCATTATGTCTATGGATGTGAATCCATTCTA  
GTTCCCTCTTCTAAACGATCCTTTTCATCCACGATCGTCGTCTCATGGATCTTTCCCTGAT  
CGAACTCATTTTGATCGAAAGATCAAACATATTATCAGAAATTCTCGT---CGAAATTCA  
CTGAAAAGTATCTGGTCGTTGAAGGATCCTAGAATTCATGTTAGATATGCAGAAAGA  
TCTATTATAGCTATAAAGGGTACTCATCTCCTAGTGAAAAAATGTAGATATCATCTTCCA  
ATTTTTCGGCAATTTTATTTCCATCTTTGGTCCGAACCATATAGGGTATGTTCTCATCAA  
TTATCCAA---GAATTGTTCTTCTTCTTTAGGTTATTTTCTGAGGGTTCGGATGAAACCT  
CTTCTGGTCAGGACCAAAAATGCTAGATGAGTTATTTCATTACCGATCTTATTACCGATGAA  
TTTGATCCAATAGTTCCGATTGTACCAATAATTGGATTATTGGCTAGAGAAAAATTATGT  
GACATATCAGGGCGGCCAATTAGTAAATTGTATTGGACTAGTCTAACAGATGATGATATC  
CTCGATCGATTGATCGAATTTGGAAAAATATTTTTCTTACTACAGTGGATCCCTTGAT  
CGAGATGGTTTATATCGTATAAAGTATaTAcT

>Callitropsis\_bentharii\_DSG717

TTTCGTCGCTGGATCCTAGATGCTcCtTCTTTGCAtTTATTACGATCGATTCTCCATGAA  
TG-----TAGTTTTAGTCGAGAAAAATTTGCAGAAATC---TCTGATTACACAGAGAGAA  
AATACG---TTCTCCCTGTTCTTTTGAATTCTTATGTGTATGAATGCGAATCGTTTTTA  
ATTCTCTTATTAACGATTTTTTAATTCACAATCATTGTTATATGAATCTTTCCGGAC  
CGAACTCATTTTGAGAAAAAGATCAAAGATATTGTTATATTTCTCCTCAAAAAATTCA  
ACAAAAAAGATCTGGTTGTTGAAGGATTCTTTCATCCATTATGTGAGATATGGAGAAAGA  
TCCCTTATAGCTCTAAAGGGTACGCATCTTCAAGTGAAAAAATGTAGATATCATCTGTTT  
CATTTTTGGCAATACTATTTTCATCTTTGGTTTCAACCGTATAGAATATGCAGTCTTGAA  
TTATCCAA---GATTCTTTCTCTTTTTTAGGGTTTTTATGCATATTAAAATGAGACCT  
CTCGTGGTTAGAGCCAAAATGCTAGATGATTATTTCATTACCGATCTTATTACCCATGAA  
TTAAACTCAACAGCTCCGATTAAATCAATTCTTTTTTCTTTAGCTAAAGAAAAGTTTTGT  
GACATCTCAGGGTGGCCAATTAGTAAATTGTCTTGGACCAGTCTATCAGATGATGATATT  
CTCGATCGATTGATCGAATTTGGATAAATCTTTTTCTTACTACAGTGGATCCATCAAT  
CAAGATGGTTTATATAATATAAAATATATACT

>Callitropsis\_bentharii\_SHL40

TTTCGTCGCTGGATCCTAGATGCTcCtTCTTTGCAtTTATTACGATCGATTCTCCATGAA  
TG-----TAGTTTTAGTCGAGAAAAATTTGCAGAAATC---TCTGATTACACAGAGAGAA  
AATACG---TTCTCCCTGTTCTTTTGAATTCTTATGTGTATGAATGCGAATCGTTTTTA  
ATTCTCTTATTAACGATTTTTTAATTCACAATCATTGTTATATGAATCTTTCCGGAC  
CGAACTCATTTTGAGAAAAAGATCAAAGATATTGTTATATTTCTCCTCAAAAAATTCA  
ACAAAAAAGATCTGGTTGTTGAAGGATTCTTTCATCCATTATGTGAGATATGGAGAAAGA  
TCCCTTATAGCTCTAAAGGGTACGCATCTTCAAGTGAAAAAATGTAGATATCATCTGTTT  
CATTTTTGGCAATACTATTTTCATCTTTGGTTTCAACCGTATAGAATATGCAGTCTTGAA  
TTATCCAA---GATTCTTTCTCTTTTTTAGGGTTTTTATGCATATTAAAATGAGACCT  
CTCGTGGTTAGAGCCAAAATGCTAGATGATTATTTCATTACCGATCTTATTACCCATGAA  
TTAAACTCAACAGCTCCGATTAAATCAATTCTTTTTTCTTTAGCTAAAGAAAAGTTTTGT  
GACATCTCAGGGTGGCCAATTAGTAAATTGTCTTGGACCAGTCTATCAGATGATGATATT  
CTCGATCGATTGATCGAATTTGGATAAATCTTTTTCTTACTACAGTGGATCCATCAAT  
CAAGATGGTTTATATAATATAAAATATATACT

>Callitropsis\_bentharii\_SHL82

TTTCGTCGCTGGATCCTAGATGCTcCtTCTTTGCAtTTATTACGATCGATTCTCCATGAA  
TG-----TAGTTTTAGTCGAGAAAAATTTGCAGAAATC---TCTGATTACACAGAGAGAA

matK280218

AATACG---TTCTCCCTGTTCTTTGGAATTCTTATGTGTATGAATGCGAATCGTTTTTA  
ATTCTCTTATTAAACGATTTTTTAATTCACAATCATTGTTATATGAATCTTTCCGGAC  
CGAACTCATTTTGAGAAAAAGATCAAAGATATTGTTATATTTCTCCTCAAAAAATTCA  
ACAAAAAAGATCTGGTTGTTGAAGGATTCTTTCATCCATTATGTGAGATATGGAGAAAGA  
TCCCTTATAGCTCTAAAGGGTACGCATCTTCAAGTGAAAAAATGTAGATATCATCTGTTT  
CATTTTTGGCAATACTATTTTCATCTTTGGTTTCAACCGTATAGAATATGCAGTCTTGAA  
TTATCCAA---GATTTCCTTCTCTTTTTAGGGTTTTTATGCATATTAAAATGAGACCT  
CTCGTGGTTAGAGCCAAAATGCTAGATGATTTATTCATTACCGATCTTATTACCCATGAA  
TTAAACTCAACAGCTCCGATTAAATCAATTCTTTTTCTTTAGCTAAAGAAAAGTTTGT  
GACATCTCAGGGTGGCCAATTAGTAAATTGTCTTGGACCAGTCTATCAGATGATGATATT  
CTCGATCGATTGATCGAATTTGGATAAATCTTTTTCATTACTACAGTGGATCCATCAAT  
CAAGATGGTTTATATAATATAAAATATATACT

>Callitropsis\_lusitanica\_DSG722

TtTCGTCGCTgGATCCTAGATGCTcCTTCTTGCATTtAtTACGATCGATTCTCCATGAA  
TG-----TAGTtTAGTCGAGAAAATTTGCAGAAATC---TCTGATTACACAGAGAGAA  
AATACG---TTCTCCCTGTTCTTTGGAATtCTTATGTGTATGAATGCGAATCGTTTTTA  
ATTCTCTTATTAAACGATTTTTTAATTCACAATCATTGTTATATGAATCTTTCCGGAC  
CGAACTCATTTTGAGAAAAAGATCAAAGATATTGTTATATTTCTCCTCAAAAAATTCA  
ACAAAAAAGATCTGGTTGTTGAAGGATTCTTTCATCCATTATGTGAGATATGGAGAAAGA  
TCCCTTATAGCTCTAAAGGGTACGCATCTTCAAGTGAAAAAATGTAGATATCATCTGTTT  
CATTTTTGGCAATACTATTTTCATCTTTGGTTTCAACCGTATAGAATATGCAGTCTTGAA  
TTATCCAA---GATTTCCTTCTCTTTTTAGGGTTTTTATGCATATTAAAATGAGACCT  
CTCGTGGTTAGAGCCAAAATGCTAGATGATTTATTCATTACCGATCTTATTACCCATGAA  
TTAAACTCAACAGCTCCGATTAAATCAATTCTTTTTCTTTAGCTAAAGAAAAGTTTGT  
GACATCTCAGGGTGGCCAATTAGTAAATTGTCTTGGACCAGTCTATCAGATGATGATATT  
CTCGATCGATTGATCGAATTTGGATAAATCTTTTTCATTACTACAGTGGATCCATCAAT  
CAAGATGGTTTATATAATATAAAATATATACT

>Callitropsis\_lusitanica\_DSG723

TTTCGTCGCTGGATCCTAGATGCTCcTTCTTGCAtTTATTACGATCGATTCTCCATGAA  
TG-----TAGTTTTAGTCGAGAAAATTTGCAGAAATC---TCTGATTACACAGAGAGAA  
AATACG---TTCTCCCTGTTCTTTGGAATTCTTATGTGTATGAATGCGAATCGTTTTTA  
ATTCTCTTATTAAACGATTTTTTAATTCACAATCATTGTTATATGAATCTTTCCGGAC  
CGAACTCATTTTGAGAAAAAGATCAAAGATATTGTTATATTTCTCCTCAAAAAATTCA  
ACAAAAAAGATCTGGTTGTTGAAGGATTCTTTCATCCATTATGTGAGATATGGAGAAAGA  
TCCCTTATAGCTCTAAAGGGTACGCATCTTCAAGTGAAAAAATGTAGATATCATCTGTTT  
CATTTTTGGCAATACTATTTTCATCTTTGGTTTCAACCGTATAGAATATGCAGTCTTGAA  
TTATCCAA---GATTTCCTTCTCTTTTTAGGGTTTTTATGCATATTAAAATGAGACCT  
CTCGTGGTTAGAGCCAAAATGCTAGATGATTTATTCATTACCGATCTTATTACCCATGAA  
TTAAACTCAACAGCTCCGATTAAATCAATTCTTTTTCTTTAGCTAAAGAAAAGTTTGT  
GACATCTCAGGGTGGCCAATTAGTAAATTGTCTTGGACCAGTCTATCAGATGATGATATT  
CTCGATCGATTGATCGAATTTGGATAAATCTTTTTCATTACTACAGTGGATCCATCAAT  
CAAGATGGTTTATATAATATAAAATATATACT

>Callitropsis\_lusitanica\_DSG724

TTTCGTCGCTGGATCCTAGATGCTCcTTCTTGCAtTTATTACGATCGATTCTCCATGAA  
TG-----TAGTTTTAGTCCAGAAAATTTGCAGAAATC---TCTGATTACACAGAGAGAA  
AATACG---TTCTCCCTGTTCTTTGGAATtCTTATGTGTATGAATGCGAATCGTTTTTA

matK280218

ATTCCTCTTATTAAACGATTTTTTAATTCACAATCATTGTTATATGAATCTTTCCGGAC  
CGAACTCATTTTGAGAAAAAGATCAAAGATATTGTTATATTTCTCCTCAAAAAATTCA  
ACAAAAAAGATCTGGTTGTTGAAGGATTCTTTCATCCATTATGTGAGATATGGAGAAAGA  
TCCCTTATAGCTCTAAAGGGTACGCATCTTCAAGTGAAAAAATGTAGATATCATCTGTTT  
CATTTTTGGCAATACTATTTTCATCTTTGGTTTCAACCGTATAGAATATGCAGTCTTGAA  
TTATCCAA---GATTTCTTTCTCTTTTTTAGGGTTTTTTATGCATATTAAAATGAGACCT  
CTCGTGGTTAGAGCCAAAATGCTAGATGATTTATTCATTACCGATCTTATTACCCATGAA  
TTAAACTCAACAGCTCCGATTAAATCAATTCTTTTTTCTTTAGCTAAAGAAAAGTTTGT  
GACATCTCAGGGTGGCCAATTAGTAAATTGTCTTGGACCACTATCAGATGATGATATT  
CTCGATCGATTGATCGAATTTGGATAAATCTTTTTCATTACTACAGTGGATCCATCAAT  
CAAGATGGTTTATATAATATAAAATATATACT

>Callitropsis\_lusitanica\_SHL119

tTTCGTCGCTGgATcCTAGATGCTCCTTCTTTGCATTTATTACGATCGATTCTCCATGAA  
TG-----TAGTTTTAGTCGAGAAAAATTGCAGAAATC---TCTGATTACACAGAGAGAA  
AATACG---TTCTCCCTGTTCTTTTGGAACTTCTATGTGTATGAATGCGAATCGTTTTTA  
ATTCCTCTTATTAAACGATTTTTTAATTCACAATCATTGTTATATGAATCTTTCCGGAC  
CGAACTCATTTTGAGAAAAAGATCAAAGATATTGTTATATTTCTCCTCAAAAAATTCA  
ACAAAAAAGATCTGGTTGTTGAAGGATTCTTTCATCCATTATGTGAGATATGGAGAAAGA  
TCCCTTATAGCTCTAAAGGGTACGCATCTTCAAGTGAAAAAATGTAGATATCATCTGTTT  
CATTTTTGGCAATACTATTTTCATCTTTGGTTTCAACCGTATAGGATATGCAGTCTTGAA  
TTATCCAA---GATTTCTTTCTCTTTTTTAGGGTTTTTTATGCATATTAAAATGAGACCT  
CTCGTGGTTAGAGCCAAAATGCTAGATGATTTATTCATTACCGATCTTATTACCCATGAA  
TTAAACTCAACAGCTCCGATTAAATCAATTCTTTTTTCTTTAGCTAAAGAAAAGTTTGT  
GACATCTCAGGGTGGCCAATTAGTAAATTGTCTTGGACCACTATCAGATGATGATATT  
CTCGATCGATTGATCGAATTTGGATAAATCTTTTTCATTACTACAGTGGATCCATCAAT  
CAAGATGGTTTATATAATATAAAATATATACT

>Callitropsis\_lusitanica\_SHL147

tTTCGTCGCTGgATCcTAGATGcTccTTCTTTGCATTTATTACGATCGATTCTCCATGAA  
TG-----TAGTTTTAGTCGAGAAAAATTGCAGAAATC---TCTGATTACACAGAGAGAA  
AATACG---TTCTCCCTGTTCTTTTGGAACTtCTTATGTGTATGAATGCGAATCGTTTTTA  
ATTCCTCTTATTAAACGATTTTTTAATTCACAATCATTGTTATATGAATCTTTCCGGAC  
CGAACTCATTTTGAGAAAAAGATCAAAGATATTGTTATATTTCTCCTCAAAAAATTCA  
ACAAAAAAGATCTGGTTGTTGAAGGATTCTTTCATCCATTATGTGAGATATGGAGAAAGA  
TCCCTTATAGCTCTAAAGGGTACGCATCTTCAAGTGAAAAAATGTAGATATCATCTGTTT  
CATTTTTGGCAATACTATTTTCATCTTTGGTTTCAACCGTATAGAATATGCAGTCTTGAA  
TTATCCAA---GATTTCTTTCTCTTTTTTAGGGTTTTTTATGCATATTAAAATGAGACCT  
CTCGTGGTTAGAGCCAAAATGCTAGATGATTTATTCATTACCGATCTTATTACCCATGAA  
TTAAACTCAACAGCTCCGATTAAATCAATTCTTTTTTCTTTAGCTAAAGAAAAGTTTGT  
GACATCTCAGGGTGGCCAATTAGTAAATTGTCTTGGACCACTATCAGATGATGATATT  
CTCGATCGATTGATCGAATTTGGATAAATCTTTTTTCATTACTACAGTGGATCCATCAAT  
CAAGATGGTTTATATAATATAAAATATATACT

>Juniperus\_depeana\_DSG417

TTTCGTCGCTGGATCCTAGATACTcCTTCTTTGCATTTATTACGATGGATTCTCCATGAA  
TG-----TAGTTTTAGTCGAGAAAAATTGCAGAAATC---TCTGATTACACAGGGAGAA  
AATACG---TTCTCCCTGTTCTTTTGGAAATTTTTATGTGTATGAATGCGAATCGTTTTTA  
ATTCCTCTTATTAAACGATTTTTTAATTCACAATCATTGTTATATGAATCTTTCCGGAT

matK280218

CGAACTCATTTTGAGAAAAAGATCAAAGATATTGTTCTATTTCTCCTCAAAAAATTTCACAAAAAAGATCTGGTTGTAAAGAATTCTTTCATCCATTATGTGAGATATGGAGAAAGATCCCTTATAGCTCTAAAGGGTACGCATCTTCAAGTGAAAAAATGTAGATATCATCTGTTTCATTTTGGCAATACTATTTTCATCTTTGGTTTCAACCGTATAGGATATGCAGTCTTGAAATATCCAACAAGATTTCTTTTTCTTTTTAGGTTTTTTATGCATGTTAAATGAGACCTCTCGTGGTTAGAGCCAAAATGCTAGATGATTATTCATTACCGATCTTATTACCAATGAATTAACTCAATAGCTCCGATTAAACCAATTCTTCTTTCTTTAGTTAAAGAAAAGTTTTGTGACATCTCAGGGTGGCCAATTAGTAAATTGTCTTGGACCAGTCTATCAGATGATGATATTCTCGATCGATTCGATCGAATTTTATAAATCTTTTGATTACTACAGTGGATCCATCAATCAAAATGGTTTATATCATATAAAGTATATACT

>Juniperus\_deppeana\_SHL148

TTTCGTCGCTGgATCCTAGATACTCCTTCTTTGCATTTATTACGATGGATTCTCCATGAATG-----TAGTTTTAGTCGAGAAAAATTGCAGAAATC---TCTGATTACACAGGGAGAAATACG---TTCTCCCTGTTCTTTGGAATTTTATGTGTATGAATGCGAATCGTTTTTAATTCCTCTTATTAACGATTTTTTAATTCACAATCATTGTTATATGAATCTTTCCGGATCGAACTCATTTTGAGAAAAAGATCAAAGATATTGTTCTATTTCTCCTCAAAAAATTTCACAAAAAAGATCTGGTTGTAAAGAATTCTTTCATCCATTATGTGAGATATGGAGAAAGATCCCTTATAGCTCTAAAGGGTACGCATCTTCAAGTGAAAAAATGTAGATATCATCTGTTTCATTTTGGCAATACTATTTTCATCTTTGGTTTCAACCGTATAGGATATGCAGTCTTGAAATATCCAACAAGATTTCTTTTTCTTTTTAGGTTTTTTATGCATGTTAAATGAGACCTCTCGTGGTTAGAGCCAAAATGCTAGATGATTATTCATTACCGATCTTATTACCAATGAATTAACTCAATAGCTCCGATTAAACCAATTCTTCTTTCTTTAGTTAAAGAAAAGTTTTGTGACATCTCAGGGTGGCCAATTAGTAAATTGTCTTGGACCAGTCTATCAGATGATGATATTCTCGATCGATTCGATCGAATTTTATAAATCTTTTGATTACTACAGTGGATCCATCAATCAAAATGGTTTATATCATATAAAGTATATACT

>Juniperus\_deppeana\_SHL19

TTTCGTCGCTGGATCCTAGATACTCcTTCTTTGCATTTATTACGATGGATTCTCCATGAATG-----TAGTTTTAGTCGAGAAAAATTGCAGAAATC---TCTGATTACACAGGGAGAAATACG---TTCTCCCTGTTCTTTGGAATTTTATGTGTATGAATGCGAATCGTTTTTAATTCCTCTTATTAACGATTTTTTAATTCACAATCATTGTTATATGAATCTTTCCGGATCGAACTCATTTTGAGAAAAAGATCAAAGATATTGTTCTATTTCTCCTCAAAAAATTTCACAAAAAAGATCTGGTTGTAAAGAATTCTTTCATCCATTATGTGAGATATGGAGAAAGATCCCTTATAGCTCTAAAGGGTACGCATCTTCAAGTGAAAAAATGTAGATATCATCTGTTTCATTTTGGCAATACTATTTTCATCTTTGGTTTCAACCGTATAGGATATGCAGTCTTGAAATATCCAACAAGATTTCTTTTTCTTTTTAGGTTTTTTATGCATGTTAAATGAGACCTCTCGTGGTTAGAGCCAAAATGCTAGATGATTATTCATTACCGATCTTATTACCAATGAATTAACTCAATAGCTCCGATTAAACCAATTCTTCTTTCTTTAGTTAAAGAAAAGTTTTGTGACATCTCAGGGTGGCCAATTAGTAAATTGTCTTGGACCAGTCTATCAGATGATGATATTCTCGATCGATTCGATCGAATTTTATAAATCTTTTGATTACTACAGTGGATCCATCAATCAAAATGGTTTATATCATATAAAGTATATACT

>Juniperus\_flaccida\_SHL113

TTTCGTCGCTGGATCCTAGATACTCcTTCTTTGCATTtAtTACGATGGATTCTCCATGAATG-----TAGTTTTAGTCGAGAAAAATTGCAGAAATC---TCTGATTACACAGGGAGAAATACG---TTCTCCCTGTTCTTTGGAATTTTATGTGTATGAATGCGAATCGTTTTTAATTCCTCTTATTAACGATTTTTTAATTCACAATCATTGTTATATGAATCTTTCCGGATCGAACTCATTTtGAGAAAAAGATCAAAGATATTGTTCTATTTCTCCTCAAAAAATTTCACAAAAAAGATCTGGTTGTAAAGAATTCTTTCATCCATTATGTGAGATATGGAGAAAGATCCCTTATAGCTCTAAAGGGTACGCATCTTCAAGTGAAAAAATGTAGATATCATCTGTTTCATTTTGGCAATACTATTTTCATCTTTGGTTTCAACCGTATAGGATATGCAGTCTTGAAATATCCAACAAGATTTCTTTTTCTTTTTAGGTTTTTTATGCATGTTAAATGAGACCTCTCGTGGTTAGAGCCAAAATGCTAGATGATTATTCATTACCGATCTTATTACCAATGAATTAACTCAATAGCTCCGATTAAACCAATTCTTCTTTCTTTAGTTAAAGAAAAGTTTTGTGACATCTCAGGGTGGCCAATTAGTAAATTGTCTTGGACCAGTCTATCAGATGATGATATTCTCGATCGATTCGATCGAATTTTATAAATCTTTTGATTACTACAGTGGATCCATCAATCAAAATGGTTTATATCATATAAAGTATATACT

matK280218

ACAAAAAAGATCTGGTTGTTGAAGAATTCTTTCATCCATTATGTGAGATATGGAGAAAGA  
TCCCTTATAGCTCTAAAGGGTACGCATCTTCAAGTGAAAAAATGTAGATATCATCTGTTT  
CATTTTTGGCAATACTATTTTCATCTTTGGTTTAAACCGTATAGGATATGCAGTCTTGAA  
TTATCCAA---GATTCTTTTTCTTTTTAGGTTTTTTTATGCATGTTAAAATGAGACCT  
CTCGTGGTTAGAGCCAAAATGCTAGATGATTATTCATTACCGATCTTATTACCAATGAA  
TTAAACTCAATAGCTCCGATTAAACCAATTCTTCTTTCTTTAGTTAAAGAAAAAGTTTTGT  
GACATCTCAGGGTGGCCAATTAGTAAATTGTCTTGGACCAGTCTATCAGATGATGATATT  
CTCGATCGATTGATCGAATTTTTATAAATCTTTTTGATTACTACAGTGGATCCATCAAT  
CAAGATGGTTTATATCATATAAAGTATATACT

>Juniperus\_flaccida\_SHL127

TTtCGTCGcTGgATCcTAGATACTCcTTCTTTGCATTTATTACGATGGATTCTCCATGAA  
TG-----TAGTTTTAGTCGAGAAAAATTGCAGAAATC---TCTGATTACACAGGGAGAA  
AATACG---TTCTCCCTGTTCTTTTGAATTTTTATGTGTATGAATGCGAATCGTTTTTA  
ATTCTCTTATTAAACGATTTTTTAATTCACAATCATTGTTATATGAATCTTTCCGGAT  
CGAACTCATTTTGAGAAAAAGATCAAAGATATTGTTCTATTTCTCCTCAAAAAATTCA  
ACAAAAAAGATCTGGTTGTTGAAGAATTCTTTCATCCATTATGTGAGATATGGAGAAAGA  
TCCCTTATAGCTCTAAAGGGTACGCATCTTCAAGTGAAAAAATGTAGATATCATCTGTTT  
CATTTTTGGCAATACTATTTTCATCTTTGGTTTAAACCGTATAGGATATGCAGTCTTGAA  
TTATCCAA---GATTCTTTTTCTTTTTAGGTTTTTTTATGCATGTTAAAATGAGACCT  
CTCGTGGTTAGAGCCAAAATGCTAGATGATTATTCATTACCGATCTTATTACCAATGAA  
TTAAACTCAATAGCTCCGATTAAACCAATTCTTCTTTCTTTAGTTAAAGAAAAAGTTTTGT  
GACATCTCAGGGTGGCCAATTAGTAAATTGTCTTGGACCAGTCTATCAGATGATGATATT  
CTCGATCGATTGATCGAATTTTTATAAATCTTTTTGATTACTACAGTGGATCCATCAAT  
CAAGATGGTTTATATCATATAAAGTATATACT

>Juniperus\_flaccida\_SHL33

TTTCGTCGCTGGATCcTAGATACTCcTTCTTTGCATTTATTACGATGGATTCTcCATGAA  
TG-----TAGTTTTAGTCGAGAAAAATTGCAGAAATC---TCTGATTACACAGGGAGAA  
AATACG---TTCTCCCTGTTCTTTTGAATTTTTATGTGTATGAATGCGAATCGTTTTTA  
ATTCTCTTATTAAACGATTTTTTAATTCACAATCATTGTTATATGAATCTTTCCGGAT  
CGAACTCATTTTGAGAAAAAGATCAAAGATATTGTTCTATTTCTCCTCAAAAAATTCA  
ACAAAAAAGATCTGGTTGTTGAAGAATTCTTTCATCCATTATGTGAGATATGGAGAAAGA  
TCCCTTATAGCTCTAAAGGGTACGCATCTTCAAGTGAAAAAATGTAGATATCATCTGTTT  
CATTTTTGGCAATACTATTTTCATCTTTGGTTTAAACCGTATAGGATATGCAGTCTTGAA  
TTATCCAA---GATTCTTTTTCTTTTTAGGTTTTTTTATGCATGTTAAAATGAGACCT  
CTCGTGGTTAGAGCCAAAATGCTAGATGATTATTCATTACCGATCTTATTACCAATGAA  
TTAAACTCAATAGCTCCGATTAAACCAATTCTTCTTTCTTTAGTTAAAGAAAAAGTTTTGT  
GACATCTCAGGGTGGCCAATTAGTAAATTGTCTTGGACCAGTCTATCAGATGATGATATT  
CTCGATCGATTGATCGAATTTTTATAAATCTTTTTGATTACTACAGTGGATCCATCAAT  
CAAGATGGTTTATATCATATAAAGTATATACT

>Juniperus\_flaccida\_SHL34

TTTCGTCGCTGgATCCTAGATACTCcTTCTTTGCATTTATTACGATGGATTCTCCATGAA  
TG-----TAGTTTTAGTCGAGAAAAATTGCAGAAATC---TCTGATTACACAGGGAGAA  
AATACG---TTCTCCCTGTTCTTTTGAATTTTTATGTGTATGAATGCGAATCGTTTTTA  
ATTCTCTTATTAAACGATTTTTTAATTCACAATCATTGTTATATGAATCTTTCCGGAT  
CGAACTCATTTTGAGAAAAAGATCAAAGATATTGTTCTATTTCTCCTCAAAAAATTCA  
ACAAAAAAGATCTGGTTGTTGAAGAATTCTTTCATCCATTATGTGAGATATGGAGAAAGA

matK280218

TCCCTTATAGCTCTAAAGGGTACGCATCTTCAAGTGAAAAAATGTAGATATCATCTGTTT  
CATTTTTGGCAATACTATTTTCATCTTTGGTTTAAACCGTATAGGATATGCAGTCTTGAA  
TTATCCAA---GATTCTTTTTCTTTTTAGGTTTTTTTATGCATGTTAAAATGAGACCT  
CTCGTGGTTAGAGCCAAAATGCTAGATGATTTATTCATTACCGATCTTATTACCAATGAA  
TTAAACTCAATAGCTCCGATTAAACCAATTCTTCTTTCTTTAGTTAAAGAAAAGTTTTGT  
GACATCTCAGGGTGGCCAATTAGTAAATTGTCTTGGACCAGTCTATCAGATGATGATATT  
CTCGATCGATTGATCGAATTTTTATAAATCTTTTTGATTACTACAGTGGATCCATCAAT  
CAAGATGGTTTATATCATATAAAGTATATACT

>Juniperus\_monosperma\_SHL124

TTTCGTCGCTGGATCCTAGATACTCCTTCTTGCATTtATTACGATGGATTCTCCATGAA  
TG-----TAGTtTTAGTCGAGAAAAATTGCAGAAATC---TCTGATTACACAGGGAGAA  
AATACG---TTCTCCCTGTTCTTTTGAATTTTTATGTGTATGAATGCGAATCGTTTTTA  
ATTCTCTTATTAAACGATTTTTTAATTCACAATCATTGTTATATGAATCTtTTCCGGAT  
CGAACTCATTTTGAGAAAAAGATCAAAGATATTGTTCTATTTCCTCCTCAAAAAATTCA  
ACAAAAAAGATCTGGTTGTAAAGAATTCTTTCATCCATTATGTGAGATATGGAGAAAGA  
TCCCTTATAGCTCTAAAGGGTACGCATCTTCAAGTGAAAAAATGTAGATATCATCTGTTT  
CATTTTTGGCAATACTATTTTCATCTTTGGCTTCAACCGTATAGGATATGCAGTCTTGAA  
TTATCCAACAAGATTTCTTTTTCTTTTTAGGTTTTTTTATGCATGTTGAAATGAGACCT  
CTCGTGGTTAGAGCCAAAATGCTAGATGATTTATTCATTACCGATCTTATTACCAATGAA  
TTAAACTCAATAGCTCCGATTAAACCAATTCTTCTTTCTTTAGTTAAAGAAAAGTTTTGT  
GACATCTCAGGGTGGCCAATTAGTAAATTGTCTTGGACCAGTCTATCAGATGATGATATT  
CTCGATCGATTGATCGAATTTTTATAAATCTTTTTGATTACTACAGTGGATCCATCAAT  
CAAAATGGTTTATATCATATAAAGTATATACT

>Juniperus\_monosperma\_SHL126

TTTCGTCGCTGGATCCTAGATACTcCTTCTTGCATTTATTACGATGGATTCTCCATGAA  
TG-----TAGTTTTAGTCGAGAAAAATTGCAGAAATC---TCTGATTACACAGGGAGAA  
AATACG---TTCTCCCTGTTCTTTTGAATTTTTATGTGTATGAATGCGAATCGTTTTTA  
ATTCTCTTATTAAACGATTTTTTAATTCACAATCATTGTTATATGAATCTTTTCCGGAT  
CGAACTCATTTTGAGAAAAAGATCAAAGATATTGTTCTATTTCCTCCTCAAAAAATTCA  
ACAAAAAAGATCTGGTTGTAAAGAATTCTTTCATCCATTATGTGAGATATGGAGAAAGA  
TCCCTTATAGCTCTAAAGGGTACGCATCTTCAAGTGAAAAAATGTAGATATCATCTGTTT  
CATTTTTGGCAATACTATTTTCATCTTTGGCTTCAACCGTATAGGATATGCAGTCTTGAA  
TTATCCAACAAGATTTCTTTTTCTTTTTAGGTTTTTTTATGCATGTTGAAATGAGACCT  
CTCGTGGTTAGAGCCAAAATGCTAGATGATTTATTCATTACCGATCTTATTACCAATGAA  
TTAAACTCAATAGCTCCGATTAAACCAATTCTTCTTTCTTTAGTTAAAGAAAAGTTTTGT  
GACATCTCAGGGTGGCCAATTAGTAAATTGTCTTGGACCAGTCTATCAGATGATGATATT  
CTCGATCGATTGATCGAATTTTTATAAATCTTTTTGATTACTACAGTGGATCCATCAAT  
CAAAATGGTTTATATCATATAAAGTATATACT

>Juniperus\_monticola\_DSG1223DSG719

TTTCGTCGCTGGATCCTAGATACTCCTTCTTGCATTTATTACGATGGATTCTCCATGAA  
TG-----TAGTTTTAGTCGAGAAAAATTGCAGAAATC---TCTGATTACACAGGGAGAA  
AATACG---TTCTCCCTGTTCTTTTGAATTTTTATGTGTATGAATGCGAATCGTTTTTA  
ATTCTCTTATTAAACGATTTTTTAATTCACAATCATTGTTATATGAATCTTTTCCGGAT  
CGAACTCATTTTGAGAAAAAGATCAAAGATATTGTTCTATTTCCTCCTCAAAAAATTCA  
ACAAAAAAGATCTGGTTGTGAAGAATTCTTTCATCCATTATGTGAGATATGGAGAAAGA  
TCCCTTATAGCTCTAAAGGGTACGCATCTTCAAGTGAAAAAATGTAGATATCATCTGTTT



matK280218

CATTTTTGGCAATACTATTTTCATCTTTGGTTTAAACCGTATAGGATATGCAGTCTTGAA  
TTATCCAA---GATTCTTTTTCTTTTTAGGTTTTTTATGCATGTTAAAATGAGACCT  
CTCGTGGTTAGAGCCAAAATGCTAGATGATTATTCATTACCGATCTTATTACCAATGAA  
TTAAACTCAATAGCTCCGATTAAACCAATTCTTCTTTCTTAGTTAAAGAAAAGTTTTGT  
GACATCTCAGGGTGGCCAATTAGTAAATTGTCTTGACCAGTCTATCAGATGATGATATT  
CTCGATCGATTGATCGAATTTTTATAAATCTTTTTGATTACTACAGTGGATCCATCAAT  
CAAGATGGTTTATATCATATAAAGTATATACT

>Pinus\_ayacahuite\_DSG1039

TTTCGTCGCTTGATCCGAGATGCTCCCTCCTTGACCCATTACGCTCTGTTCTCTATGAA  
TA-----TCGAAATAGTCCAGAGAATTACAAAGATCAATTATTGTCGTCCTCAAGAGTA  
AATACGAGATTCTTCCTGTTCTGTGGAATTATTATGTCTATGAATGCGAATCCATTTTC  
TTTTCCCTTCTTAAACGATCCTCTCATTACGATCGTTATCTCATAGACCTTTCCCTCAG  
CGAACTCATTTTCATCGAAAGATAAAACATATTATCATATTTTCTCGT---CGAAATTCA  
CTGAAAAGTATCTGGTTGTTGAAGGATCCTAAAATTAAGTATGTTAGATATGGTGAAAGA  
TCTATTATAGCTATAAAAGGTACTCATCTCCTAGTGAAAAAATGTAGATATTATCTTCTA  
CTTTTTCGGCAATGTTATTTCCATCTTTGGTCCGAACCGTATAGGGTCTGTTCTCATCAA  
TTATCCAA---GAATTGTTCTTCTTCTCCAGGTTATTTTCTGAGGGTTCGGATGAACCT  
CTTTTTGTCAGAACCAAAATGCTAGATGAGTTATTCATCGCCGATCTTATTACCAATGAA  
TTTGATCCAATAGTTCGATTGTACCAATACTTGGATTATTGGCTAGAGAAAAATTCTGT  
GACGTATCAGGACGGCCAATTAGTAAATTGTCTTGACCAATCTAACAGATGATGATATC  
CTCAATCGATTTGATCAAATTTGGAGAAATCTTTTTCTTACTACAGTGGATCCTTTGGT  
CGAGATGGTTTATATCGTATAAAGTATATACT

>Pinus\_ayacahuite\_DSG413

TTTCGTCGCTTGATCCGAGATGCTCCCTCCTTGACCCATTACGCTCTGTTCTCTATGAA  
TA-----TCGAAATAGTCCAGAGAATTACAAAGATCAATTATTGTCGTCCTCAAGAGTA  
AATACGAGATTCTTCCTGTTCTGTGGAATTATTATGTCTATGAATGCGAATCCATTTTC  
TTTTCCCTTCTTAAACGATCCTCTCATTACGATCGTTATCTCATAGACCTTTCCCTCAG  
CGAACTCATTTTCATCGAAAGATAAAACATATTATCATATTTTCTCGT---CGAAATTCA  
CTGAAAAGTATCTGGTTGTTGAAGGATCCTAAAATTAAGTATGTTAGATATGGTGAAAGA  
TCTATTATAGCTATAAAAGGTACTCATCTCCTAGTGAAAAAATGTAGATATTATCTTCTA  
CTTTTTCGGCAATGTTATTTCCATCTTTGGTCCGAACCGTATAGGGTCTGTTCTCATCAA  
TTATCCAA---GAATTGTTCTTCTTCTCCAGGTTATTTTCTGAGGGTTCGGATGAACCT  
CTTTTTGTCAGAACCAAAATGCTAGATGAGTTATTCATCGCCGATCTTATTACCAATGAA  
TTTGATCCAATAGTTCGATTGTACCAATACTTGGATTATTGGCTAGAGAAAAATTCTGT  
GACGTATCAGGACGGCCAATTAGTAAATTGTCTTGACCAATCTAACAGATGATGATATC  
CTCAATCGATTTGATCAAATTTGGAGAAATCTTTTTCTTACTACAGTGGATCCTTTGGT  
CGAGATGGTTTATATCGTATAAAGTATATACT

>Pinus\_ayacahuite\_SHL121

ttTCGTCGCTTGATCcGaGATGCTCCCTCCTTGACCCATTACGCTCTGTTCTCTATGAA  
TA-----TCGAAaTAGTCCAGAGAATTACAAAGATCAATTATTGTCGTCCTCAAGAGTA  
AATACGAGATTCTTCCTGTTCTGTGGAATTATTATGTCTATGAATGCGAATCCATTTTC  
TTTTCCCTTCTTAAACGATCCTCTCATTACGATCGTTATCTCATAGACCTTTCCCTCAG  
CGAACTCATTTTCATCGAAAGATAAAACATATTATCATATTTTCTCGT---CGAAATTCA  
CTGAAAAGTATCTGGTTGTTGAAGGATCCTAAAATTAAGTATGTTAGATATGGTGAAAGA  
TCTATTATAGCTATAAAAGGTACTCATCTCCTAGTGAAAAAATGTAGATATTATCTTCTA  
CTTTTTCGGCAATGTTATTTCCATCTTTGGTCCGAACCGTATAGGGTCTGTTCTCATCAA

matK280218

TTATCCAA---GAATTGTTCTTCTTCTCCAGGTTATTTTCTGAGGGTTCGGATGAACCCCT  
CTTTTGTGTCAGAACCAAAATGCTAGATGAGTTATTCATCGCCGATCTTATTACCAATGAA  
TTTGATCCAATAGTTCGGATTGTACCAATACTTGGATTATTGGCTAGAGAAAAATTCTGT  
GACGTATCAGGACGGCCAATTAGTAAATTGTCTTGGACCAATCTAACAGATGATGATATC  
CTCAATCGATTTGATCAAATTTGGAGAAATCTTTTTCATTACTACAGTGGATCCTTTGGT  
CGAGATGGTTTATATCGTATAAAGTATATACT

>Pinus\_cembroides\_DSG444

TTTCGTCGCTGGATCCGAGATGCTCCCTCCTTGCACCCATTACGCTCTGTTCTCTATGAA  
TA-----TCGAAATAGTCCAGAGAATTTACAAAGATCAATTATTGTCGTCCCAAGAGTA  
AATACGAGATTATTCCTGTTCTGTGGAATTATTATGTCTATGAATGCGAATCCATTTTA  
TTTTCCCTTCTTAAACGATCCTCTCATTACGATCGTTGTCTCATAGATCTTCCCTCAG  
CGAACTCATTTTCATCGAAAGATAAAACATATTATCATATTTTCTCGT---CGAAATTCA  
CTGAAAAGTATCTGGTTGTTGAAGGATCCTAAAATTCATGTTAGATATGGTGAAAGA  
TCTATTATAGCTATAAAAGGTACTCATCTCCTAGTGAAAAAATGTAGATATTATCTTCTA  
ATTTTTCGGCAATGTTATTTCCATCTTTGGTCCGAACCGTATAGGGTCTGTTCTCATCAA  
TTATCCAA---GAATTGTTCTTCTTCTCCAGGTTATTTTCTGAGGGTTCGGATGAACCCCT  
CTTTTGGTTCAGAACCAAAATGCTAGATGAGTTATTCATCGCCGATCTTATTACCAATGAA  
TTTGATCCAATAGTTCGGATTGTACCAATACTTGGATTATTGGCTAGAGAAAAATTATGT  
GACATATCAGGACGGCCAATTAGTAAATTGTCTTGGACCAATCTAACAGATGATGATATC  
CTCAATCGATTTGATCAAATTTGGAGAAATATTTTTCATTACTACAGTGGATCCTTTGGT  
CGAGATGGTTTATATCGTATAAAGTATATACT

>Pinus\_cembroides\_SHL36

TTTCGTCGCTGGATCCGAGATGCTCCCTCCTTGCACCCATTACGCTCTGTTCTCTATGAA  
TA-----TCGAAATAGTCCAGAGAATTTACAAAGATCAATTATTGTCGTCCCAAGAGTA  
AATACGAGATTATTCCTGTTCTGTGGAATTATTATGTCTATGAATGCGAATCCATTTTA  
TTTTCCCTTCTTAAACGATCCTCTCATTACGATCGTTGTCTCATAGATCTTCCCTCAG  
CGAACTCATTTTCATCGAAAGATAAAACATATTATCATATTTTCTCGT---CGAAATTCA  
CTGAAAAGTATCTGGTTGTTGAAGGATCCTAAAATTCATGTTAGATATGGTGAAAGA  
TCTATTATAGCTATAAAAGGTACTCATCTCCTAGTGAAAAAATGTAGATATTATCTTCTA  
ATTTTTCGGCAATGTTATTTCCATCTTTGGTCCGAACCGTATAGGGTCTGTTCTCATCAA  
TTATCCAA---GAATTGTTCTTCTTCTCCAGGTTATTTTCTGAGGGTTCGGATGAACCCCT  
CTTTTGGTTCAGAACCAAAATGCTAGATGAGTTATTCATCGCCGATCTTATTACCAATGAA  
TTTGATCCAATAGTTCGGATTGTACCAATACTTGGATTATTGGCTAGAGAAAAATTATGT  
GACATATCAGGACGGCCAATTAGTAAATTGTCTTGGACCAATCTAACAGATGATGATATC  
CTCAATCGATTTGATCAAATTTGGAGAAATATTTTTCATTACTACAGTGGATCCTTTGGT  
CGAGATGGTTTATATCGTATAAAGTATATACT

>Pinus\_devoniana\_DSG449

tTTCGTCGCTgGATCCGAGATGCTCCCTcCTTGCAcCCATTACGATCTGTTCTCTATGAA  
TA-----TAGAAATAGTCCAGATAATTTACAAAGATCAATTATTGTCGTCCCAAGAGTA  
AATACGAGATTCTTCTGTTCTGTGGAATTATTATGTCTGTGAATGCGAATCCATTTTA  
TTTTCCCGTCTTAAACGATCCTCTCATTACGATCGTTGTCTCATGGATCTTCCCTCAG  
CGAACTCATTTTCATCGAAAGATAAAACATATTATCATATTTTCTCGT---CGAAATTCA  
CTGAAAAGTATCTGGTCGTTGAAGGATCCTAAAATTCATGTTAGATATGGCGAAAGA  
CCTATTATAGCTATAAAGGGTGCTCATCTCCTAGTAAAAAATGTAGATATTATCTTCTA  
ATTTTTCGGCAATTTTATTTCCATCTTTGGTCCGAACCGTATAGGGTCTGTTCTCATCAA  
TTATCCAA---GAATTGTTCTTCTTCTAGGTTATTTTTTGAGGGTTCGGATGAACCCCT

matK280218

ATTTTGGTCAGAACCAAAATGCTAGATGAGTTATTCATCGCCGATCTTATTACCGATGAA  
ATTGATCCAATAGTTCGATTGTACCAATAATTGGATTATTGGCTACAGAAAAATTCTGT  
GACATATCAGGGCGGCCAATTAGTAAATTGTCTTGGACCAGTCTAACAGATGATGATATC  
CTCGATCGATTGATCAAATTTGGAGAAATCTTTTTCATTACTACAGTGGATCCTTTGAT  
CGAGATGGTTTATATCGTATAAAGTATATACT

>Pinus\_devoniana\_DSG521

tTTCGTCGCTgGATCCGaGAtGCTcCCTCCTTGACCCATTACGATCTGTTCTCTATGAA  
TA-----TAGAAATAGTCCAGATAATTTACAAAGATCAATTATTGTCGTCCCAAGAGTA  
AATACGAGATTCTTCCTGTTCTGTGGAATTATTATGTCTGTGAATGCGAATCCATTTTA  
TTTTCCCGTCTTAAACGATCCTCTCATTACGATCGTTGTCTCATGGATCTTCCCTCAG  
CGAACTCATTTTCATCGAAAGATAAAACATATTATCATATTTTCTCGT---CGAAATTCA  
CTGAAAAGTATCTGGTCGTTGAAGGATCCTAAAATTCATGTTAGATATGGCGAAAGA  
CCTATTATAGCTATAAAGGGTGCTCATCTCCTAGTTAAAAAATGTAGATATTATCTTCTA  
ATTTTTCGGCAATTTTATTTCCATCTTTGGTCCGAACCGTATAGGGTCTGTTCTCATCAA  
TTATCCAA---GAATTGTTCTTCTTCTCCAGGTTATTTTTTGAGGGTTCGGATGAACCT  
ATTTTGGTCAGAACCAAAATGCTAGATGAGTTATTCATCGCCGATCTTATTACCGATGAA  
ATTGATCCAATAGTTCGATTGTACCAATAATTGGATTATTGGCTACAGAAAAATTCTGT  
GACATATCAGGGCGGCCAATTAGTAAATTGTCTTGGACCAGTCTAACAGATGATGATATC  
CTCGATCGATTGATCAAATTTGGAGAAATCTTTTTCATTACTACAGTGGATCCTTTGAT  
CGAGATGGTTTATATCGTATAAAGTATATACT

>Pinus\_devoniana\_DSG677

TTTCGTCGCTGGATCCGAGATGCTCCCTCCTTGACCCATTACGATCTGTTCTCTATGAA  
TA-----TAGAAATAGTCCAGATAATTTACAAAGATCAATTATTGTCGTCCCAAGAGTA  
AATACGAGATTCTTCCTGTTCTGTGGAATTATTATGTCTGTGAATGCGAATCCATTTTA  
TTTTCCCGTCTTAAACGATCCTCTCATTACGATCGTTGTCTCATGGATCTTCCCTCAG  
CGAACTCATTTTCATCGAAAGATAAAACATATTATCATATTTTCTCGT---CGAAATTCA  
CTGAAAAGTATCTGGTCGTTGAAGGATCCTAAAATTCATGTTAGATATGGCGAAAGA  
CCTATTATAGCTATAAAGGGTGCTCATCTCCTAGTTAAAAAATGTAGATATTATCTTCTA  
ATTTTTCGGCAATTTTATTTCCATCTTTGGTCCGAACCGTATAGGGTCTGTTCTCATCAA  
TTATCCAA---GAATTGTTCTTCTTCTCTAGGTTATTTTTTGAGGGTTCGGATGAACCT  
ATTTTGGTCAGAACCAAAATGCTAGATGAGTTATTCATCGCCGATCTTATTACCGATGAA  
ATTGATCCAATAGTTCGATTGTACCAATAATTGGATTATTGGCTACAGAAAAATTCTGT  
GACATATCAGGGCGGCCAATTAGTAAATTGTCTTGGACCAGTCTAACAGATGATGATATC  
CTCGATCGATTGATCAAATTTGGAGAAATCTTTTTCATTACTACAGTGGATCCTTTGAT  
CGAGATGGTTTATATCGTATAAAGTATATACT

>Pinus\_greggii\_DSG426

TTTCGTCGCTGGATCCGAGATGCTCCCTCCTTGACCCATTACGATCTGTTCTCTATGAA  
TA-----TAGAAATAGTCCAGATAATTTACAAAGATCAATTATTGTCGTCCCAAGAGTA  
AATACGAGATTCTTCCTGTTCTGTGGAATTATTATGTCTGTGAATGCGAATCCATTTTA  
TTTTCCCGTCTTAAACGATCCTCTCATTACGATCGTTGTCTCATGGATCTTCCCTCAG  
CGAACTCATTTTCATCGAAAGATAAAACATATTATCATATTTTCTCGT---CGAAATTCA  
CTGAAAAGTATCTGGTCGTTGAAGGATCCTAAAATTCATGTTAGATATGGCGAAAGA  
CCTATTATAGCTATAAAGGGTGCTCATCTCCTAGTTAAAAAATGTAGATATTATCTTCTA  
ATTTTTCGGCAATTTTATTTCCATCTTTGGTCCGAACCGTATAGGGTCTGTTCTCATCAA  
TTATCCAA---GAATTGTTCTTCTTCTCTAGGTTATTTTTTGAGGGTTCGGATGAACCT  
ATTTTGGTCAGAACCAAAATGCTCGATGAGTTATTCATCGCCGATCTTATTACCGATGAA

matK280218

ATTGATCCAATAGTTCGGATTGTACCAATAATTGGATTATTGGCTACAGAAAAATTCTGT  
GACATATCAGGGCGGCCAATTAGTAAATTGTCTTGGACCAGTCTAACAGATGATGATATC  
CTCGATCGATTGATCAAAATTTGGAGAAATCTTTTTCTTACTACAGTGGATCCTTTGAT  
CGAGATGGTTTATATCGTATAAAGTATATACT

>Pinus\_greggii\_DSG506

tTTCGTCGCTGGATCCGAGATGCTCCCTCCTTGACCCATTACGATCTGTTCTCTATGAA  
TA-----TAGAAATAGTCCAGATAATTTACAAAGATCAATTATTGTCGTCCCAAGAGTA  
AATACGAGATTCTTCCTGTTCTGTGGAATTATTATGTCTGTGAATGCGAATCCATTTTA  
TTTTCCCGTCTTAAACGATCCTCTCATTACGATCGTTGTCTCATGGATCTTCCCTCAG  
CGAACTCATTTTCATCGAAAGATAAAACATATTATCATATTTTCTCGT---CGAAATTCA  
CTGAAAAGTATCTGGTCGTTGAAGGATCCTAAAATTCATATGTTAGATATGGCGAAAGA  
CCTATTATAGCTATAAAGGGTGCTCATCTCCTAGTTAAAAAATGTAGATATTATCTTCTA  
ATTTTTCGGCAATTTTATTTCCATCTTTGGTCCGAACCGTATAGGGTCTGTTCTCATCAA  
TTATCCAA---GAATTGTTCTTCTTCTAGGTTATTTTTTGAGGGTTCGGATGAACCT  
ATTTTGGTCAGAACCAAAATGCTCGATGAGTTATTCATCGCCGATCTTATTACCGATGAA  
ATTGATCCAATAGTTCGGATTGTACCAATAATTGGATTATTGGCTACAGAAAAATTCTGT  
GACATATCAGGGCGGCCAATTAGTAAATTGTCTTGGACCAGTCTAACAGATGATGATATC  
CTCGATCGATTGATCAAAATTTGGAGAAATCTTTTTCTTACTACAGTGGATCCTTTGAT  
CGAGATGGTTTATATCGTATAAAGTATATACT

>Pinus\_greggii\_DSG524

TTTCGTCGCTGGATCCGAGATGCTCCCTCCTTGACCCATTACGATCTGTTCTCTATGAA  
TA-----TAGAAATAGTCCAGATAATTTACAAAGATCAATTATTGTCGTCCCAAGAGTA  
AATACGAGATTCTTCCTGTTCTGTGGAATTATTATGTCTGTGAATGCGAATCCATTTTA  
TTTTCCCGTCTTAAACGATCCTCTCATTACGATCGTTGTCTCATGGATCTTCCCTCAG  
CGAACTCATTTTCATCGAAAGATAAAACATATTATCATATTTTCTCGT---CGAAATTCA  
CTGAAAAGTATCTGGTCGTTGAAGGATCCTAAAATTCATATGTTAGATATGGCGAAAGA  
CCTATTATAGCTATAAAGGGTGCTCATCTCCTAGTTAAAAAATGTAGATATTATCTTCTA  
ATTTTTCGGCAATTTTATTTCCATCTTTGGTCCGAACCGTATAGGGTCTGTTCTCATCAA  
TTATCCAA---GAATTGTTCTTCTTCTAGGTTATTTTTTGAGGGTTCGGATGAACCT  
ATTTTGGTCAGAACCAAAATGCTCGATGAGTTATTCATCGCCGATCTTATTACCGATGAA  
ATTGATCCAATAGTTCGGATTGTACCAATAATTGGATTATTGGCTACAGAAAAATTCTGT  
GACATATCAGGGCGGCCAATTAGTAAATTGTCTTGGACCAGTCTAACAGATGATGATATC  
CTCGATCGATTGATCAAAATTTGGAGAAATCTTTTTCTTACTACAGTGGATCCTTTGAT  
CGAGATGGTTTATATCGTATAAAGTATATACT

>Pinus\_greggii\_SHL137

ttTCGTCGCTGgATCcGAGATGCTCCCTCcTTGCACcCATTACGATCTGTTCTCTATGAA  
TA-----TAGAAATAGTCCAGATAATTTACAAAGATCAATTATTGTCGTCCcCAAGAGTA  
AATACGAGATTCTTCCTGTTCTGTGGAATTATTATGTCTGTGAATGCGAATCCATTTTA  
TTTTCCCGTCTTAAACGATCCTCTCATTACGATCGTTGTCTCATGGATCTTCCCTCAG  
CGAACTCATTTTCATCGAAAGATAAAACATATTATCATATTTTCTCGT---CGAAATTCA  
CTGAAAAGTATCTGGTCGTTGAAGGATCCTAAAATTCATATGTTAGATATGGCGAAAGA  
CCTATTATAGCTATAAAGGGTGCTCATCTCCTAGTTAAAAAATGTAGATATTATCTTCTA  
ATTTTTCGGCAATTTTATTTCCATCTTTGGTCCGAACCGTATAGGGTCTGTTCTCATCAA  
TTATCCAA---GAATTGTTCTTCTTCTAGGTTATTTTTTGAGGGTTCGGATGAACCT  
ATTTTGGTCAGAACCAAAATGCTCGATGAGTTATTCATCGCCGATCTTATTACCGATGAA  
ATTGATCCAATAGTTCGGATTGTACCAATAATTGGATTATTGGCTACAGAAAAATTCTGT

matK280218

GACATATCAGGGCGGCCAATTAGTAAATTGTCTTGGACCAGTCTAACAGATGATGATATC  
CTCGATCGATTGATCAAATTTGGAGAAATCTTTTTCATTACTACAGTGGATCCTTTGAT  
CGAGATGGTTTATATCGTATAAAGTATATACT

>Pinus\_greggii\_SHL140

tTTCGTCGCTGgATCcGAGATGCTCCCTCCTTGACCCATtACGATCTGTTCTCTATGAA  
TA-----TAGAAATAGTCCAGATAATTTACAAAGATCAATTATTGTCGTCCCAAGAGTA  
AATACGAGATTCTTCCTGTTCCCTGTGGAATTATTATGTCTGTGAATGCGAATCCATTTTA  
TTTTCCCGTCTTAAACGATCCTCTCATTACGATCGTTGTCTCATGGATCTTCCCTCAG  
CGAACTCATTTTCATCGAAAGATAAAACATATTATCATATTTTCTCGT---CGAAATTCA  
CTGAAAAGTATCTGGTCGTTGAAGGATCCTAAAATTCATGTTAGATATGGCGAAAGA  
CCTATTATAGCTATAAAGGGTGCTCATCTCCTAGTTAAAAAATGTAGATATTATCTTCTA  
ATTTTTCGGCAATTTTATTTCCATCTTTGGTCCGAACCGTATAGGGTCTGTTCTCATCAA  
TTATCCAA---GAATTGTTCTTCTCTAGGTTATTTTTTGAGGGTTCGGATGAACCT  
ATTTTGGTCAGAACCAAAATGCTCGATGAGTTATTCATCGCCGATCTTATTACCGATGAA  
ATTGATCCAATAGTTCGATTGTACCAATAATTGGATTATTGGCTACAGAAAAATTCTGT  
GACATATCAGGGCGGCCAATTAGTAAATTGTCTTGGACCAGTCTAACAGATGATGATATC  
CTCGATCGATTGATCAAATTTGGAGAAATCTTTTTCATTACTACAGTGGATCCTTTGAT  
CGAGATGGTTTATATCGTATAAAGTATATACT

>Pinus\_greggii\_SHL142

ttTCGTCGCTGgATCcGAGATGCTCCcTCCTTGACcCATtACGATCTGTtCTCTATGAA  
TA-----TAGAaATAGTCCAGATAATTTACAAAGATCAATTATtGTCGTCCCAAGAGTA  
AATACGAGATTCTTCCTGTTCCCTGTGGAATTATTATGTCTGTGAATGCGAATCCATTTTA  
TTTTCCCGTCTTAAACGATCCTCTCATTACGATCGTTGTCTCATGGATCTTCCCTCAG  
CGAACTCATTTtCATCGAAAGATAAAACATATTATCATATTTTCTCGT---CGAAATTCA  
CTGAAAAGTATCTGGTCGTTGAAGGATCCTAAAATTCATGTTAGATATGGCGAAAGA  
CCTATTATAGCTATAAAGGGTGCTCATCTCCTAGTTAAAAAATGTAGATATTATCTTCTA  
ATTTTTCGGCAATTTTATTTCCATCTTTGGTCCGAACCGTATAGGGTCTGTTCTCATCAA  
TTATCCAA---GAATTGTTCTTCTCTAGGTTATTTTTTGAGGGTTCGGATGAACCT  
ATTTTGGTCAGAACCAAAATGCTCGATGAGTTATTCATCGCCGATCTTATTACCGATGAA  
ATTGATCCAATAGTTCGATTGTACCAATAATTGGATTATTGGCTACAGAAAAATTCTGT  
GACATATCAGGGCGGCCAATTAGTAAATTGTCTTGGACCAGTCTAACAGATGATGATATC  
CTCGATCGATTGATCAAATTTGGAGAAATCTTTTTCATTACTACAGTGGATCCTTTGAT  
CGAGATGGTTTATATCGTATAAAGTATATACT

>Pinus\_hartwegii\_DSG613

tTTCGTCGCTGGATCcGAGATGCTcCCTCCTTGACCCATTACGATCTGTTCTCTATGAA  
TA-----TAGAAATAGTCCAGATAATTTACAAAGATCAATTATTGTCGTCCCAAGAGTA  
AATACGAGATTCTTCCTGTTCCCTGTGGAATTATTATGTCTGTGAATGCGAATCCATTTTA  
TTTTCCCGTCTTAAACGATCCTCTCATTACGATCGTTGTCTCATGGATCTTCCCTCAG  
CGAACTCATTTTCATCGAAAGATAAAACATATTATCATATTTTCTCGT---CGAAATTCA  
CTGAAAAGTATCTGGTCGTTGAAGGATCCTAAAATTCATGTTAGATATGGCGAAAGA  
CCTATTATAGCTATAAAGGGTGCTCATCTCCTAGTTAAAAAATGTAGATATTATCTTCTA  
ATTTTTCGGCAATTTTATTTCCATCTTTGGTCCGAACCGTATAGGGTCTGTTCTCATCAA  
TTATCCAA---GAATTGTTCTTCTTCCAGGTTATTTTTTGAGGGTTCGGATGAACCT  
ATTTTGGTCAGAACCAAAATGCTAGATGAGTTATTCATCGCCGATCTTATTACCGATGAA  
ATTGATCCAATAGTTCGATTGTACCAATAATTGGATTATTGGCTACAGAAAAATTCTGT  
GACATATCAGGGCGGCCAATTAGTAAATTGTCTTGGACCAGTCTAACAGATGATGATATC

CTCGATCGATTCGATCAAATTTGGAGAAATCTTTTTCACTACTACAGTGGATCCTTTGAT  
CGAGATGGTTTATATCGTATAAAGTATATACT

>Pinus\_hartwegii\_DSG616

TTTCGTCGCTGGATCCGAGATGCTCCCTCCTTGACCCATTACGATCTGTTCTCTATGAA  
TA-----TAGAAATAGTCCAGATAATTTACAAAGATCAATTATTGTCGTCCCAAGAGTA  
AATACGAGATTCTTCCTGTTCTGTGGAATTATTATGTCTGTGAATGCGAATCCATTTTA  
TTTTCCCGTCTTAAACGATCCTCTCATTACGATCGTTGTCTCATGTATCTTTCCCTCAG  
CGAACTCATTTTCATCGAAAGATAAAACATATTATCATATTTTCTCGT---CGAAATTCA  
CTGAAAAGTATCTGGTCGTTGAAGGATCCTAAAATTCATGTTAGATATGGCGAAAGA  
CCTATTATAGCTATAAAGGGTGCTCATCTCCTAGTTAAAAAATGTAGATATTATCTTCTA  
ATTTTTCGGCAATTTTATTTCCATCTTTGGTCCGAACCGTATAGGGTCTGTTCTCATCAA  
TTATCCAA---GAATTGTTCTTCTTCTCCAGGTTATTTTTTGAGGGTTCGGATGAACCCT  
ATTTTGGTCAGAACCAAAATGCTAGATGAGTTATTCATCGCCGATCTTATTACCGATGAA  
ATTGATCCAATAGTTCCGATTGTACCAATAATTGGATTATTGGCTACAGAAAAATTCTGT  
GACATATCAGGGCGGCCAATTAGTAAATTGTCTTGGACCAGTCTAACAGATGATGATATC  
CTCGATCGATTCGATCAAATTTGGAGAAATCTTTTTCACTACTACAGTGGATCCTTTGAT  
CGAGATGGTTTATATCGTATAAAGTATATACT

>Pinus\_hartwegii\_SHL149

ttTCGTCGCTGGATCcGAGATGCTCCcTCCTTGACcCATTACGATCTGTTCTCTATGAA  
TA-----TAGAAATAGTCCAGATAATTTACAAAGATCAATTATTGTCGTCCCAAGAGTA  
AATACGAGATTCTTCCTGTTCTGTGGAATTATTATGTCTGTGAATGCGAATCCATTTTA  
TTTTCCCGTCTTAAACGATCCTCTCATTACGATCGTTGTCTCATGGATCTTTCCCTCAG  
CGAACTCATTTTCATCGAAAGATAAAACATATTATCATATTTTCTCGT---CGAAATTCA  
CTGAAAAGTATCTGGTCGTTGAAGGATCCTAAAATTCATGTTAGATATGGCGAAAGA  
CCTATTATAGCTATAAAGGGTGCTCATCTCCTAGTTAAAAAATGTAGATATTATCTTCTA  
ATTTTTCGGCAATTTTATTTCCATCTTTGGTCCGAACCGTATAGGGTCTGTTCTCATCAA  
TTATCCAA---GAATTGTTCTTCTTCTCCAGGTTATTTTTTGAGGGTTCGGATGAACCCT  
ATTTTGGTCAGAACCAAAATGCTAGATGAGTTATTCATCGCCGATCTTATTACCGATGAA  
ATTGATCCAATAGTTCCGATTGTACCAATAATTGGATTATTGGCTACAGAAAAATTCTGT  
GACATATCAGGGCGGCCAATTAGTAAATTGTCTTGGACCAGTCTAACAGATGATGATATC  
CTCGATCGATTCGATCAAATTTGGAGAAATCTTTTTCACTACTACAGTGGATCCTTTGAT  
CGAGATGGTTTATATCGTATAAAGTATATACT

>Pinus\_leiophylla\_DSG611

TTTCGTCGCTGGATCCGAGATGCTCCCTCCTTGACCCATTACGATCTGTTCTCTATGAA  
TA-----TAGAAATAGTCCAGATAATTTACAAAGATCAATTATTGTCGTCCCAAGAGTA  
AATACGAGATTCTTCCTGTTCTGTGGAATTATTATGTCTGTGAATGCGAATCCATTTTA  
TTTTCCCGTCTTAAACGATCCTCTCATTACGATCGTTGTCTCATGGATCTTTCCCTCAG  
CGAACTCATTTTCATCGAAAGATAAAACATATTATCATATTTTCTCGT---CGAAATTCA  
CTGAAAAGTATCTGGTCGTTGAAGGATCCTAAAATTCATGTTAGATATGGCGAAAGA  
CCTATTATAGCTATAAAGGGTGCTCATCTCCTAGTTAAAAAATGTAGATATTATCTTCTA  
ATTTTTCGGCAATTTTATTTCCATCTTTGGTCCGAACCGTATAGGGTCTGTTCTCATCAA  
TTATCCAA---GAATTGTTCTTCTTCTCCAGGTTATTTTTTGAGGGTTCGGATGAACCCT  
ATTTTGGTCAGAACCAAAATGCTCGATGAGTTATTCATCGCCGATCTTATTACCGATGAA  
ATTGATCCAATAGTTCCGATTGTACCAATAATTGGATTATTGGCTACAGAAAAATTCTGT  
GACATATCAGGGCGGCCAATTAGTAAATTGTCTTGGACCAGTCTAACAGATGATGATATC  
CTCGATCGATTCGATCAAATTTGGAGAAATCTTTTTCACTACTACAGTGGATCCTTTGAT

CGAGATGGTTTATATCGTATAAAGTATATACT

>Pinus\_leiophylla\_DSG619

ttTCGTCGCTgGATcCGAGATGCTcCCTcCTTGCAcCCATTACGATCTGTTCTCTATGAA  
TA-----TAGAAATAGTCCAGATAATTTACAAAGATCAATTATtGTCGTCCCAAGAGTA  
AATACGAGATTCTTCCTGTTCTGTGGAATTATTATGTCTGTGAATGCGAATCCATTTTA  
TTTTCCCGTCTTAAACGATCCTCTCATTACGATCGTTGTCTCATGGATCTTTCCCTCAG  
CGAACTCATTTTCATCGAAAGATAAAACATATTATCATATTTTCTCGT---CGAAATTCA  
CTGAAAAGTATCTGGTCGTTGAAGGATCCTAAAATTCATGTTAGATATGGCGAAAGA  
CCTATTATAGCTATAAAGGGTGCTCATCTCCTAGTTAAAAAATGTAGATATTATCTTCTA  
ATTTTTCGGCAATTTTATTTCCATCTTTGGTCCGAACCGTATAGGGTCTGTTCTCATCAA  
TTATCCAA---GAATTGTTCTTCTTCTCCAGGTTATTTTTTGAGGGTTCGGATGAACCCT  
ATTTTGGTCAGAACCAAAATGCTCGATGAGTTATTCATCGCCGATCTTATTACCGATGAA  
ATTGATCCAATAGTTCGATTGTACCAATAATTGGATTATTGGCTACAGAAAAATTCTGT  
GACATATCAGGGCGGCCAATTAGTAAATTGTCTTGGACCACTAACAGATGATGATATC  
CTCGATCGATTGATCAAAATTTGGAGAAATCTTTTTCATTACTACAGTGGATCCTTTGAT  
CGAGATGGTTTATATCGTATAAAGTATATACT

>Pinus\_leiophylla\_SHL22

tTCGTCGCTgGATCCGAGATGCTcCCTCCTTGCAcCCATTACGATCTGTTCTCTATGAA  
TA-----TAGAAATAGTCCAGATAATTTACAAAGATCAATTATTGTCGTCCCAAGAGTA  
AATACGAGATTCTTCCTGTTCTGTGGAATTATTATGTCTGTGAATGCGAATCCATTTTA  
TTTTCCCGTCTTAAACGATCCTCTCATTACGATCGTTGTCTCATGGATCTTTCCCTCAG  
CGAACTCATTTTCATCGAAAGATAAAACATATTATCATATTTTCTCGT---CGAAATTCA  
CTGAAAAGTATCTGGTCGTTGAAGGATCCTAAAATTCATGTTAGATATGGCGAAAGA  
CCTATTATAGCTATAAAGGGTGCTCATCTCCTAGTTAAAAAATGTAGATATTATCTTCTA  
ATTTTTCGGCAATTTTATTTCCATCTTTGGTCCGAACCGTATAGGGTCTGTTCTCATCAA  
TTATCCAA---GAATTGTTCTTCTTCTCCAGGTTATTTTTTGAGGGTTCGGATGAACCCT  
ATTTTGGTCAGAACCAAAATGCTCGATGAGTTATTCATCGCCGATCTTATTACCGATGAA  
ATTGATCCAATAGTTCGATTGTACCAATAATTGGATTATTGGCTACAGAAAAATTCTGT  
GACATATCAGGGCGGCCAATTAGTAAATTGTCTTGGACCACTAACAGATGATGATATC  
CTCGATCGATTGATCAAAATTTGGAGAAATCTTTTTCATTACTACAGTGGATCCTTTGAT  
CGAGATGGTTTATATCGTATAAaGTATATACT

>Pinus\_montezumae\_DSG416

TTTCGTCGCTGGATCCGAGATGCTCCCTCCTTGCAcCCATTACGATCTGTTCTCTATGAA  
TA-----TAGAAATAGTCCAGATAATTTACAAAGATCAATTATTGTCGTCCCAAGAGTA  
AATACGAGATTCTTCCTGTTCTGTGGAATTATTATGTCTGTGAATGCGAATCCATTTTA  
TTTTCCCGTCTTAAACGATCCTCTCATTACGATCGTTGTCTCATGGATCTTTCCCTCAG  
CGAACTCATTTTCATCGAAAGATAAAACATATTATCATATTTTCTCGT---CGAAATTCA  
CTGAAAAGTATCTGGTCGTTGAAGGATCCTAAAATTCATGTTAGATATGGCGAAAGA  
CCTATTATAGCTATAAAGGGTGCTCATCTCCTAGTTAAAAAATGTAGATATTATCTTCTA  
ATTTTTCGGCAATTTTATTTCCATCTTTGGTCCGAACCGTATAGGGTCTGTTCTCATCAA  
TTATCCAA---GAATTGTTCTTCTTCTCCAGGTTATTTTTTGAGGGTTCGGATGAACCCT  
ATTTTGGTCAGAACCAAAATGCTAGATGAGTTATTCATCGCCGATCTTATTACCGATGAA  
TTTGATCCAATAGTTCGATTGTACCAATAATTGGATTATTGGCTACAGAAAAATTCTGT  
GACATATCAGGGCGGCCAATTAGTAAATTGTCTTGGACCACTAACAGATGATGATATC  
CTCGATCGATTGATCAAAATTTGGAGAAATCTTTTTCATTACTACAGTGGATCCTTTGAT  
CGAGATGGTTTATATCGTATAAAGTATATACT

>Pinus\_montezumae\_SHL150

ttTCGTCGCTGgATCcGAGATGCTCCCTCCTTGACCCATTACGATCTGTTCTCTATGAA  
TA-----TAGAAATAGTCCAGATAATTTACAAAGATCAATTATTGTCGTCCCAAGAGTA  
AATACGAGATTCTTCCTGTTCTGTGGAATTATTATGTCTGTGAATGCGAATCCATTTTA  
TTTTCCCGTCTTAAACGATCCTCTCATTACGATCGTTGTCTCATGGATCTTCCCTCAG  
CGAACTCATTTTCATCGAAAGATAAAACATATTATCATATTTTCTCGT---CGAAATTCA  
CTGAAAAGTATCTGGTCGTTGAAGGATCCTAAAATTCATATGTTAGATATGGCGAAAGA  
CCTATTATAGCTATAAAGGGTGCTCATCTCCTAGTTAAAAAATGTAGATATTATCTTCTA  
ATTTTTCGGCAATTTTATTTCCATCTTTGGTCCGAACCGTATAGGGTCTGTTCTCATCAA  
TTATCCAA---GAATTGTTCTTCTTCTCCAGGTTATTTTTTGAGGGTTCGGATGAACCT  
ATTTTGGTCAGAACCAAAATGCTAGATGAGTTATTCATCGCCGATCTTATTACCGATGAA  
TTTGATCCAATAGTTCCGATTGTACCAATAATTGGATTATTGGCTACAGAAAAATTCTGT  
GACATATCAGGGCGGCCAATTAGTAAATTGTCTTGGACCAGTCTAACAGATGATGATATC  
CTCGATCGATTGATCAAATTTGGAGAAATCTTTTTCATTACTACAGTGGATCCTTTGAT  
CGAGATGGTTTATATCGTATAAAGTATATACT

>Pinus\_montezumae\_SHL155

tTTCGTCGCTGGATCCGAGATGCTCCCTCCTTGACCCATTACGATCTGTTCTCTATGAA  
TA-----TAGAAATAGTCCAGATAATTTACAAAGATCAATTATtGTCGTCCCAAGAGTA  
AATACGAGATTCTTCCTGTTCTGTGGAATTATTATGTCTGTGAATGCGAATCCATTTTA  
TTTTCCCGTCTTAAACGATCCTCTCATTACGATCGTTGTCTCATGGATCTTCCCTCAG  
CGAACTCATTTtCATCGAAAGATAAAACATATTATCATATTTTCTCGT---CGAAATTCA  
CTGAAAAGTATCTGGTCGTTGAAGGATCCTAAAATTCATATGTTAGATATGGCGAAAGA  
CCTATTATAGCTATAAAGGGTGCTCATCTCCTAGTTAAAAAATGTAGATATTATCTTCTA  
ATTTTTCGGCAATTTTATTTCCATCTTTGGTCCGAACCGTATAGGGTCTGTTCTCATCAA  
TTATCCAA---GAATTGTTCTTCTTCTCCAGGTTATTTTTTGAGGGTTCGGATGAACCT  
ATTTTGGTCAGAACCAAAATGCTAGATGAGTTATTCATCGCCGATCTTATTACCGATGAA  
TTTGATCCAATAGTTCCGATTGTACCAATAATTGGATTATTGGCTACAGAAAAATTCTGT  
GACATATCAGGGCGGCCAATTAGTAAATTGTCTTGGACCAGTCTAACAGATGATGATATC  
CTCGATCGATTGATCAAATTTGGAGAAATCTTTTTCATTACTACAGTGGATCCTTTGAT  
CGAGATGGTTTATATCGTATAAAGTATATACT

>Pinus\_oocarpa\_DSG711

TTTCGTCGCTGGATCCGAGATGCTCCCTCCTTGACCCATTACGATCTGTTCTCTATGAA  
TA-----TAGAAATAGTCCAGATAATTTACAAAGATCAATTATTGTCGTCCCAAGAGTA  
AATACGAGATTCTTCCTGTTCTGTGGAATTATTATGTCTGTGAATGCGAATCCATTTTA  
TTTTCCCGTCTTAAACGATCCTCTCATTACGATCGTTGTCTCATGGATCTTCCCTCAG  
CGAACTCATTTTCATCGAAAGATAAAACATATTATCATATTTTCTCGT---CGAAATTCA  
CTGAAAAGTATCTGGTCGTTGAAGGATCCTAAAATTCATATGTTAGATATGGCGAAAGA  
CCTATTATAGCTATAAAGGGTGCTCATCTCCTAGTTAAAAAATGTAGATATTATCTTCTA  
ATTTTTCGGCAATTTTATTTCCATCTTTGGTCCGAACCGTATAGGGTCTGTTCTCATCAA  
TTATCCAA---GAATTGTTCTTCTTCTCCAGGTTATTTTTTGAGGGTTCGGATGAACCT  
ATTTTGGTCAGAACCAAAATGCTCGATGAGTTATTCATCGCCGATCTTATTACCGATGAA  
ATTGATCCAATAGTTCCGATTGTACCAATAATTGGATTATTGGCTACAGAAAAATTCTGT  
GACATATCAGGGCGGCCAATTAGTAAATTGTCTTGGACCAGTCTAACAGATGATGATATC  
CTCGATCGATTGATCAAATTTGGAGAAATCTTTTTCATTACTACAGTGGATCCTTTGAT  
CGAGATGGTTTATATCGTATAAAGTATATACT

>Pinus\_oocarpa\_SHL138



matK280218

tTTCGTCGCTGgATCcGAGATGCTCCCTCCTTGCACCCATTACGATCTGTTCTCTATGAA  
TA-----TAGAAATAGTCCAGATAATTTACAAAGATCAATTATTGTCGTCCCAAGAGTA  
AATACGAGATTCTTCCTGTTCTGTGGAATTATTATGTCTGTGAATGCGAATCCATTTTA  
TTTTCCCGTCTTAAACGATCCTCTCATTACGATCGTTGTCTCATGGATCTTCCCTCAG  
CGAACTCATTTTCATCGAAAGATAAAACATATTATCATATTTTCTCGT---CGAAATTCA  
CTGAAAAGTATCTGGTCGTTGAAGGATCCTAAAATTCATGTTAGATATGGCGAAAGA  
CCTATTATAGCTATAAAGGGTGCTCATCTCCTAGTTAAAAAATGTAGATATTATCTTCTA  
ATTTTTCGGCAATTTTATTTCCATCTTTGGTCCGAACCGTATAGGGTCTGTTCTCATCAA  
TTATCCAA---GAATTGTTCTTCTTCTCCAGGTTATTTTTTGAGGGTTCGGATGAACCT  
ATTTTGGTCAGAACCAAAATGCTCGATGAGTTATTCATCGCCGATCTTATTACCGATGAA  
ATTGATCCAATAGTTCGATTGTACCAATAATTGGATTATTGGCTACAGAAAAATTCTGT  
GACATATCAGGGCGGCCAATTAGTAAATTGTCTTGGACCAGTCTAACAGATGATGATATC  
CTCGATCGATTGATCAAATTTGGAGAAATCTTTTTCATTACTACAGTGGATCCTTTGAT  
CGAGATGGTTTATATCGTATAAAGTATATACT

>Pinus\_oocarpa\_SHL145

tTTCGTCGCTGgATCCGAGATGCTCCCTCCTTGCACCCATTACGATCTGTTCTCTATGAA  
TA-----TAGAAATAGTCCAGATAATTTACAAAGATCAATTATTGTCGTCCCAAGAGTA  
AATACGAGATTCTTCCTGTTCTGTGGAATTATTATGTCTGTGAATGCGAATCCATTTTA  
TTTTCCCGTCTTAAACGATCCTCTCATTACGATCGTTGTCTCATGGATCTTCCCTCAG  
CGAACTCATtTTCATCGAAAGATAAAACATATTATCATATTTTCTCGT---CGAAATTCA  
CTGAAAAGTATCTGGTCGTTGAAGGATCCTAAAATTCATGTTAGATATGGCGAAAGA  
CCTATTATAGCTATAAAGGGTGCTCATCTCCTAGTTAAAAAATGTAGATATTATCTTCTA  
ATTTTTCGGCAATTTTATTTCCATCTTTGGTCCGAACCGTATAGGGTCTGTTCTCATCAA  
TTATCCAA---GAATTGTTCTTCTTCTCCAGGTTATTTTTTGAGGGTTCGGATGAACCT  
ATTTTGGTCAGAACCAAAATGCTCGATGAGTTATTCATCGCCGATCTTATTACCGATGAA  
ATTGATCCAATAGTTCGATTGTACCAATAATTGGATTATTGGCTACAGAAAAATTCTGT  
GACATATCAGGGCGGCCAATTAGTAAATTGTCTTGGACCAGTCTAACAGATGATGATATC  
CTCGATCGATTGATCAAATTTGGAGAAATCTTTTTCATTACTACAGTGGATCCTTTGAT  
CGAGATGGTTTATATCGTATAAAGTATATACT

>Pinus\_oocarpa\_SHL146

tTTCGTCGCTGGATCcGAGATGCTCCCTCcTTGCACCCATTACGATCTGTTCTCTATGAA  
TA-----TAGAAATAGTCCAGATAATTTACAAAGATCAATTATTGTCGTCCCAAGAGTA  
AATACGAGATTCTTCCTGTTCTGTGGAATTATTATGTCTGTGAATGCGAATCCATTTTA  
TTTTCCCGTCTTAAACGATCCTCTCATTACGATCGTTGTCTCATGGATCTTCCCTCAG  
CGAACTCATTTTCATCGAAAGATAAAACATATTATCATATTTTCTCGT---CGAAATTCA  
CTGAAAAGTATCTGGTCGTTGAAGGATCCTAAAATTCATGTTAGATATGGCGAAAGA  
CCTATTATAGCTATAAAGGGTGCTCATCTCCTAGTTAAAAAATGTAGATATTATCTTCTA  
ATTTTTCGGCAATTTTATTTCCATCTTTGGTCCGAACCGTATAGGGTCTGTTCTCATCAA  
TTATCCAA---GAATTGTTCTTCTTCTCCAGGTTATTTTTTGAGGGTTCGGATGAACCT  
ATTTTGGTCAGAACCAAAATGCTCGATGAGTTATTCATCGCCGATCTTATTACCGATGAA  
ATTGATCCAATAGTTCGATTGTACCAATAATTGGATTATTGGCTACAGAAAAATTCTGT  
GACATATCAGGGCGGCCAATTAGTAAATTGTCTTGGACCAGTCTAACAGATGATGATATC  
CTCGATCGATTGATCAAATTTGGAGAAATCTTTTTCATTACTACAGTGGATCCTTTGAT  
CGAGATGGTTTATATCGTATAAAGTATATACT

>Pinus\_patula\_DSG1038

TTTCGTCGCTGGATCCGAGATGCTCCCTCCTTGCACCCATTACGATCTGTTCTCTATGAA

matK280218

TA-----TAGAAATAGTCCAGATAATTTACAAAGATCAATTATTGTCGTCCCAAGAGTA  
AATACGAGATTCTTCCTGTTCTGTGGAATTATTATGTCTGTGAATGCGAATCCATTTTA  
TTTTCCCGTCTTAAACGATCCTCTCATTACGATCGTTGTCTCATGGATCTTCCCTCAG  
CGAACTCATTTTCATCGAAAGATAAAACATATTATCATATTTTCTCGT---CGAAATTCA  
CTGAAAAGTATCTGGTCGTTGAAGGATCCTAAAATTCATGTTAGATATGGCGAAAGA  
CCTATTATAGCTATAAAGGGTGCTCATCTCCTAGTTAAAAAATGTAGATATTATCTTCTA  
ATTTTTCGGCAATTTTATTTCCATCTTTGGTCCGAACCGTATAGGGTCTGTTCTCATCAA  
TTATCCAA---GAATTGTTCTTCTTCTCCAGGTTATTTTTTGAGGGTTCGGATGAACCCCT  
ATTTTGGTCAGAACCAAAATGCTCGATGAGTTATTCATCGCCGATCTTATTACCGATGAA  
ATTGATCCAATAGTTCGATTGTACCAATAATTGGATTATTGGCTACAGAAAAATTCTGT  
GACATATCAGGGCGGCCAATTAGTAAATTGTCTTGGACCAGTCTAACAGATGATGATATC  
CTCGATCGATTGATCAAAATTTGGAGAAATCTTTTTCACTACTACAGTGGATCCTTTGAT  
CGAGATGGTTTATATCGTATAAAGTATATACT

>Pinus\_patula\_DSG408

TTTCGTCGCTGGATCCGAGATGCTCCCTCCTTGACCCATTACGATCTGTTCTCTATGAA  
TA-----TAGAAATAGTCCAGATAATTTACAAAGATCAATTATTGTCGTCCCAAGAGTA  
AATACGAGATTCTTCCTGTTCTGTGGAATTATTATGTCTGTGAATGCGAATCCATTTTA  
TTTTCCCGTCTTAAACGATCCTCTCATTACGATCGTTGTCTCATGGATCTTCCCTCAG  
CGAACTCATTTTCATCGAAAGATAAAACATATTATCATATTTTCTCGT---CGAAATTCA  
CTGAAAAGTATCTGGTCGTTGAAGGATCCTAAAATTCATGTTAGATATGGCGAAAGA  
CCTATTATAGCTATAAAGGGTGCTCATCTCCTAGTTAAAAAATGTAGATATTATCTTCTA  
ATTTTTCGGCAATTTTATTTCCATCTTTGGTCCGAACCGTATAGGGTCTGTTCTCATCAA  
TTATCCAA---GAATTGTTCTTCTTCTCCAGGTTATTTTTTGAGGGTTCGGATGAACCCCT  
ATTTTGGTCAGAACCAAAATGCTCGATGAGTTATTCATCGCCGATCTTATTACCGATGAA  
ATTGATCCAATAGTTCGATTGTACCAATAATTGGATTATTGGCTACAGAAAAATTCTGT  
GACATATCAGGGCGGCCAATTAGTAAATTGTCTTGGACCAGTCTAACAGATGATGATATC  
CTCGATCGATTGATCAAAATTTGGAGAAATCTTTTTCACTACTACAGTGGATCCTTTGAT  
CGAGATGGTTTATATCGTATAAAGTATATACT

>Pinus\_patula\_SHL144

ttTCGTCGCTGgATCcGAGATGCTCCCTCcTTGCACCCATTACGATCTGTTCTCTATGAA  
TA-----TAGAAATAGTCCAGATAATTTACAAAGATCAATTATTGTCGTCCCAAGAGTA  
AATACGAGATTCTTCCTGTTCTGTGGAATTATTATGTCTGTGAATGCGAATCCATTTTA  
TTTTCCCGTCTTAAACGATCCTCTCATTACGATCGTTGTCTCATGGATCTTCCCTCAG  
CGAACTCATTTTCATCGAAAGATAAAACATATTATCATATTTTCTCGT---CGAAATTCA  
CTGAAAAGTATCTGGTCGTTGAAGGATCCTAAAATTCATGTTAGATATGGCGAAAGA  
CCTATTATAGCTATAAAGGGTGCTCATCTCCTAGTTAAAAAATGTAGATATTATCTTCTA  
ATTTTTCGGCAATTTTATTTCCATCTTTGGTCCGAACCGTATAGGGTCTGTTCTCATCAA  
TTATCCAA---GAATTGTTCTTCTTCTCCAGGTTATTTTTTGAGGGTTCGGATGAACCCCT  
ATTTTGGTCAGAACCAAAATGCTCGATGAGTTATTCATCGCCGATCTTATTACCGATGAA  
ATTGATCCAATAGTTCGATTGTACCAATAATTGGATTATTGGCTACAGAAAAATTCTGT  
GACATATCAGGGCGGCCAATTAGTAAATTGTCTTGGACCAGTCTAACAGATGATGATATC  
CTCGATCGATTGATCAAAATTTGGAGAAATCTTTTTCACTACTACAGTGGATCCTTTGAT  
CGAGATGGTTTATATCGTATAAAGTATATACT

>Pinus\_patula\_SHL30

TTTCGTCGCTGGATCCGAGATGCTCCCTCCTTGACCCATTACGATCTGTTCTCTATGAA  
TA-----TAGAAATAGTCCAGATAATTTACAAAGATCAATTATTGTCGTCCCAAGAGTA

matK280218

AATACGAGATTCTTCCTGTTCTGTTGGAATTATTATGTCTGTGAATGCGAATCCATTTTA  
TTTTCCCGTCTTAAACGATCCTCTCATTACGATCGTTGTCTCATGGATCTTCCCTCAG  
CGAACTCATTTTCATCGAAAGATAAAACATATTATCATATTTTCTCGT---CGAAATTCA  
CTGAAAAGTATCTGGTCGTTGAAGGATCCTAAAATTCATGTTAGATATGGCGAAAGA  
CCTATTATAGCTATAAAGGGTGCTCATCTCCTAGTTAAAAAATGTAGATATTATCTTCTA  
ATTTTTCGGCAATTTTATTTCCATCTTTGGTCCGAACCGTATAGGGTCTGTTCTCATCAA  
TTATCCAA---GAATTGTTCTTCTTCTCCAGGTTATTTTTTGAGGGTTCGGATGAACCT  
ATTTTGGTCAGAACCAAAATGCTCGATGAGTTATTCATCGCCGATCTTATTACCGATGAA  
ATTGATCCAATAGTTCGATTGTACCAATAATTGGATTATTGGCTACAGAAAAATTCTGT  
GACATATCAGGGCGGCCAATTAGTAAATTGTCTTGGACCAGTCTAACAGATGATGATATC  
CTCGATCGATTGATCAAATTTGGAGAAATCTTTTTCATTACTACAGTGGATCCTTTGAT  
CGAGATGGTTTATATCGTATAAAGTATATACT

>Pinus\_pinceana\_DSG440

TTTCGTCGCTGGATCCAAGATGCTCCCTCCTTGACCCATTACGCTCTGTTCTCTATGAA  
TA-----TCGAAATAGTCCAGAGAATTTACAAAGATCAATTATTGTCGTCCCAAGAGTA  
AATACGAGATTATTCCTGTTCTGTTGGAATTATTATGTCTATGAATGCGAATCCATTTTA  
TTTTCCCTTCTTAAACGATCCTCTCATTACGATCGTTGTCTCATAGATCTTCCCTCAG  
CGAACTCATTTTCATCGAAAGATAAAACATATTATCATATTTTCTCGT---CGAAATTCA  
CTGAAAAGTATCTGGTTGTTGAAGGATCCTAAAATTAATGTTAGATATGGTGAAAGA  
TCTATTATAGCTATAAAGGTACTCATCTCCTAGTGAAAAAATGTAGATATTATCTTCTA  
ATTTTTCGGCAATGTTATTTCCATCTTTGGTCCGAACCGTATAGGGTCTGTTCTCATCAA  
TTATCCAA---GAATTGTTCTTCTTCTCCAGGTTATTTTCTGAGGGTTCGGATGAACCT  
CTTTTGGTCAGAACCAAAATGCTAGATGAGTTATTCATCGCCGATCTTATTACCAATGAA  
TTTGATCCAATAGTTCGATTGTACCAATACTTGGATTATTGGCTAGAGAAAAATTATGT  
GACATATCAGGACGGCCAATTAGTAAATTGTCTTGGACCAGTCTAACAGATGATGATATC  
CTCAATCGATTTGATCAAATTTGGAGAAATCTTTTTCATTACTACAGTGGATCCTTTGGT  
CGAGATGGTTTATATCGTATAAAGTATATACT

>Pinus\_pinceana\_DSG441

TTTCGTCGCTGGATCCAAGATGCTCCCTCCTTGACCCATTACGCTCTGTTCTCTATGAA  
TA-----TCGAAATAGTCCAGAGAATTTACAAAGATCAATTATTGTCGTCCCAAGAGTA  
AATACGAGATTATTCCTGTTCTGTTGGAATTATTATGTCTATGAATGCGAATCCATTTTA  
TTTTCCCTTCTTAAACGATCCTCTCATTACGATCGTTGTCTCATAGATCTTCCCTCAG  
CGAACTCATTTTCATCGAAAGATAAAACATATTATCATATTTTCTCGT---CGAAATTCA  
CTGAAAAGTATCTGGTTGTTGAAGGATCCTAAAATTAATGTTAGATATGGTGAAAGA  
TCTATTATAGCTATAAAGGTACTCATCTCCTAGTGAAAAAATGTAGATATTATCTTCTA  
ATTTTTCGGCAATGTTATTTCCATCTTTGGTCCGAACCGTATAGGGTCTGTTCTCATCAA  
TTATCCAA---GAATTGTTCTTCTTCTAGGTTATTTTCTGAGGGTTCGGATGAACCT  
CTTTTGGTCAGAACCAAAATGCTAGATGAGTTATTCATCGCCGATCTTATTACCAATGAA  
TTTGATCCAATAGTTCGATTGTACCAATACTTGGATTATTGGCTAGAGAAAAATTATGT  
GACATATCAGGACGGCCAATTAGTAAATTGTCTTGGACCAGTCTAACAGATGATGATATC  
CTCAATCGATTTGATCAAATTTGGAGAAATCTTTTTCATTACTACAGTGGATCCTTTGGT  
CGAGATGGTTTATATCGTATAAAGTATATACT

>Pinus\_pinceana\_SHL53

TTTCGTCGCTGGATCCAAGATGCTCCCTCCTTGACCCATTACGCTCTGTTCTCTATGAA  
TA-----TCGAAATAGTCCAGAGAATTTACAAAGATCAATTATTGTCGTCCCAAGAGTA  
AATACGAGATTATTCCTGTTCTGTTGGAATTATTATGTCTATGAATGCGAATCCATTTTA

matK280218

TTTTCCCTTCTTAAACGATCCTCTCATTACGATCGTTGTCTCATAGATCTTCCCTCAG  
CGAACTCATTTTCATCGAAAGATAAAACATATTATCATATTTTCTCGT---CGAAATTCA  
CTGAAAAGTATCTGGTTGTTGAAGGATCCTAAAATTAAGTATGTTAGATATGGTGAAAGA  
TCTATTATAGCTATAAAAGGTACTCATCTCCTAGTGAAAAAATGTAGATATTATCTTCTA  
ATTTTTCGGCAATGTTATTTCCATCTTTGGTCCGAACCGTATAGGGTCTGTTCTCATCAA  
TTATCCAA---GAATTGTTCTTCTTCTCCAGGTTATTTTCTGAGGGTTCGGATGAACCCCT  
CTTTTGGTCAGAACCAAAATGCTAGATGAGTTATTCATCGCCGATCTTATTACCAATGAA  
TTTGATCCAATAGTTCGGATTGTACCAATACTTGGATTATTGGCTAGAGAAAAATTATGT  
GACATATCAGGACGGCCAATTAGTAAATTGTCTTGGACCAGTCTAACAGATGATGATATC  
CTCAATCGATTTGATCAAATTTGGAGAAATCTTTTTCATTACTACAGTGGATCCTTTGGT  
CGAGATGGTTTATATCGTATAAAGTATATACT

>Pinus\_pseudostrobus\_DSG631

TTTCGTCGCTGGATCCGAGATGCTCCCTCCTTGACCCATTACGATCTGTTCTCTATGAA  
TA-----TAGAAATAGTCCAGATAATTTACAAAGATCAATTATTGTCGTCCCAAGAGTA  
AATACGAGATTCTTCCTGTTCTGTGGAATTATTATGTCTGTGAATGCGAATCCATTTTA  
TTTTCCCGTCTTAAACGATCCTCTCATTACGATCGTTGTCTCATGGATCTTCCCTCAG  
CGAACTCATTTTCATCGAAAGATAAAACATATTATCATATTTTCTCGT---CGAAATTCA  
CTGAAAAGTATCTGGTCGTTGAAGGATCCTAAAATTAAGTATGTTAGATATGGCGAAAGA  
CCTATTATAGCTATAAAGGGTGCTCATCTCCTAGTAAAAAATGTAGATATTATCTTCTA  
ATTTTTCGGCAATTTTATTTCCATCTTTGGTCCGAACCGTATAGGGTCTGTTCTCATCAA  
TTATCCAA---GAATTGTTCTTCTTCTCNAGGTTATTTTTTGAGGGTTCGGATGAACCCCT  
ATTTTGGTCAGAACCAAAATGCTAGATGAGTTATTCATCGCCGATCTTATTACCGATGAA  
ATTGATCCAATAGTTCGGATTGTACCAATAATTGGATTATTGGCTACAGAAAAATTCTGT  
GACATATCAGGGCGGCCAATTAGTAAATTGTCTTGGACCAGTCTAACAGATGATGATATC  
CTCGATCGATTGATCAAATTTGGAGAAATCTTTTTCATTACTACAGTGGATCCTTTGAT  
CGAGATGGTTTATATCGTATAAAGTATATACT

>Pinus\_pseudostrobus\_SHL123

ttTCGTCGCTGgATCcGAGATGCTCCCTCCTTGACCCATTACGATCTGTTCTCTATGAA  
TA-----TAGAAATAGTCCAGATAATTTACAAAGATCAATTATTGTCGTCCCAAGAGTA  
AATACGAGATTCTTCCTGTTCTGTGGAATTATTATGTCTGTGAATGCGAATCCATTTTA  
TTTTCCCGTCTTAAACGATCCTCTCATTACGATCGTTGTCTCATGGATCTTCCCTCAG  
CGAACTCATTTTCATCGAAAGATAAAACATATTATCATATTTTCTCGT---CGAAATTCA  
CTGAAAAGTATCTGGTCGTTGAAGGATCCTAAAATTAAGTATGTTAGATATGGCGAAAGA  
CCTATTATAGCTATAAAGGGTGCTCATCTCCTAGTAAAAAATGTAGATATTATCTTCTA  
ATTTTTCGGCAATTTTATTTCCATCTTTGGTCCGAACCGTATAGGGTCTGTTCTCATCAA  
TTATCCAA---GAATTGTTCTTCTTCTCCAGGTTATTTTTTGAGGGTTCGGATGAACCCCT  
ATTTTGGTCAGAACCAAAATGCTAGATGAGTTATTCATCGCCGATCTTATTACCGATGAA  
ATTGATCCAATAGTTCGGATTGTACCAATAATTGGATTATTGGCTACAGAAAAATTCTGT  
GACATATCAGGGCGGCCAATTAGTAAATTGTCTTGGACCAGTCTAACAGATGATGATATC  
CTCGATCGATTGATCAAATTTGGAGAAATCTTTTTCATTACTACAGTGGATCCTTTGAT  
CGAGATGGTTTATATCGTATAAAGTATATACT

>Pinus\_pseudostrobus\_SHL130

tTTCGTCGCTGgATcCGAGATGCTCCCTCCTTGACcCATtACGATCTGTTCTCTATGAA  
TA-----TAGAAATAGTCCAGATAATTTACAAAGATCAATTATTGTCGTCCCAAGAGTA  
AATACGAGATTCTTCCTGTTCTGTGGAATTATTATGTCTGTGAATGCGAATCCATTTTA  
TTTTCCCGTCTTAAACGATCCTCTCATTACGATCGTTGTCTCATGGATCTTCCCTCAG

matK280218

CGAACTCATTTTCATCGAAAGATAAAACATATTATCATATTTTATCGT---CGAAATTCA  
CTGAAAAGTATCTGGTCGTTGAAGGATCCTAAAATTCATGTTAGATATGGCGAAAGA  
CCTATTATAGCTATAAAGGGTGCTCATCTCCTAGTTAAAAAATGTAGATATTATCTTCTA  
ATTTTTCGGCAATTTTATTTCCATCTTTGGTCCGAACCGTATAGGGTCTGTTCTCATCAA  
TTATCCAA---GAATTGTTCTTCTTCTCCAGGTTATTTTTGAGGGTTCGGATGAACCCCT  
ATTTTGGTCAGAACCAAAATGCTAGATGAGTTATTCATCGCCGATCTTATTACCGATGAA  
ATTGATCCAATAGTTCGGATTGTACCAATAATTGGATTATTGGCTACAGAAAAATTCTGT  
GACATATCAGGGCGGCCAATTAGTAAATTGTCTTGGACCAGTCTAACAGATGATGATATC  
CTCGATCGATTGATCAAATTTGGAGAAATCTTTTTCATTACTACAGTGGATCCTTTGAT  
CGAGATGGTTTATATCGTATAAAGTATATACT

>Pinus\_pseudostrobus\_SHL25

TTTCGTCGCTGGATcCGAGATGCTCCCTCCTTGACCCATTACGATCTGTTCTCTATGAA  
TA-----TAGAAATAGTCCAGATAATTTACAAAGATCAATTATTGTCGTCCCAAGAGTA  
AATACGAGATTCTTCCTGTTCTGTGGAATTATTaTGTCTGTGAATGCGAATCCATTTTA  
TTTTCCCGTCTTAAACGATCCTCTCATTACGATCGTTGTCTCATGGATCTTTCCCTCAG  
CGAACTCATTTTCATCGAAAGATAAAACATATTATCATATTTTCTCGT---CGAAATTCA  
CTGAAAaGTATCTGGTCGTTGAAGGATCCTAAAATTCATGTTAGATATGGCGAAAGA  
CCTATTATAGCTATAAAGGGTGCTCATCTCCTAGTTAAAAAATGTAGATATTATCTTCTA  
ATTTTTCGGCAATTTTATTTCCATCTTTGGTCCGAACCGtATAGGGTcTGTCTCATCAA  
tTATCCAA---GAATTGTTCTTCTTCTTAGGTTATTTTTGAGGGtTCGGATGAACCCCT  
ATTTTGGtCAGAACCAAAATGCTAGATGAGTTATTCATCGCCGATCTTATTACCGATGAA  
ATTGATCCAATAGTTCGGATTGTACCAATAATTGGATTATTGGCTACAGAAAAATTCTGT  
GACATATCAGGGCGGCCAATTAGTAAATTGTCTTGGACCAGTCTAACAGATGATGATATC  
CTCGATCGATTGATCAAATTTGGAGAAATCTTTTTCATTACTACAGTGGATCCTTTGAT  
CGAGATGGTTTATATCGTATAAAGTATATACT

>Pinus\_teocote\_DSG410

TTTCGTCGCTGGATCCGAGATGCTCCCTCCTTGACCCATTACGATCTGTTCTCTATGAA  
TA-----TAGAAATAGTCCAGATAATTTACAAAGATCAATTATTGTCGTCCCAAGAGTA  
AATACGAGATTCTTCCTGTTCTGTGGAATTATTATGTCTGTGAATGCGAATCCATTTTA  
TTTTCCCGTCTTAAACGATCCTCTCATTACGATCGTTGTCTCATGGATCTTTCCCTCAG  
CGAACTCATTTTCATCGAAAGATAAAACATATTATCATATTTTCTCGT---CGAAATTCA  
CTGAAAAGTATCTGGTCGTTGAAGGATCCTAAAATTCATGTTAGATATGGCGAAAGA  
CCTATTATAGCTATAAAGGGTGCTCATCTCCTAGTTAAAAAATGTAGATATTATCTTCTA  
ATTTTTCGGCAATTTTATTTCCATCTTTGGTCCGAACCGTATAGGGTCTGTTCTCATCAA  
TTATCCAA---GAATTGTTCTTCTTCTCCAGGTTATTTTTGAGGGTTCGGATGAACCCCT  
ATTTTGGTCAGAACCAAAATGCTCGATGAGTTATTCATCGCCGATCTTATTACCGATGAA  
ATTGATCCAATAGTTCGGATTGTACCAATAATTGGATTATTGGCTACAGAAAAATTCTGT  
GACATATCAGGGCGGCCAATTAGTAAATTGTCTTGGACCAGTCTAACAGATGATGATATC  
CTCGATCGATTGATCAAATTTGGAGAAATCTTTTTCATTACTACAGTGGATCCTTTGAT  
CGAGATGGTTTATATCGTATAAAGTATATACT

>Pinus\_teocote\_SHL20

TTTCGTCGCTGGATCCGAGATGCTCCCTCCTtTGCAcCCATTACGATCTGtTCTCTATGAA  
TA-----TAGAAATAGTCCAGATAATTTACAAAGATCAATTATTGTCGTCCCAAGAGTA  
AATACGAGATTCTTCCTGTTCTGTGGAATTATTATGTCTGTGAATGCGAATCCATTTTA  
TTTTCCCGTCTTAAACGATCCTCTCATTACGATCGTTGTCTCATGGATCTTTCCCTCAG  
CGAACTCATTTTCATCGAAAGATAAAACATATTATCATATTTTCTCGT---CGAAATTCA

matK280218

CTGAAAAGTATCTGGTCGTTGAAGGATCCTAAAATTCATGTTAGATATGGCGAAAGA  
CCTATTATAGCTATAAAGGGTGCTCATCTCCTAGTTAAAAAATGTAGATATTATCTTCTA  
ATTTTTCGGCAATTTTATTTCCATCTTTGGTCCGAACCGTATAGGGTCTGTTCTCATCAA  
TTATCCAA---GAATTGTTCTTCTTCTCCAGGTTATTTTTTGAGGGTTCGGATGAACCCCT  
ATTTTGGTCAGAACCAAAATGCTCGATGAGTTATTCATCGCCGATCTTATTACCGATGAA  
ATTGATCCAATAGTTCCGATTGTACCAATAATTGGATTATTGGCTACAGAAAAATTCTGT  
GACATATCAGGGCGGCCAATTAGTAAATTGTCTTGGACCAGTCTAACAGATGATGATATC  
CTCGATCGATTGATCAAATTTGGAGAAATCTTTTTCTTACTACAGTGGATCCTTTGAT  
CGAGATGGTTTATATCGTATAAAGtATANNNN

>Pinus\_teocote\_SHL29

tttcgtcgtgatCcGAGATGCTCCCTCCTTGACCCATTACGATCTGTTCTCTATGAA  
TA-----TAGAAATAGTCCAGATAATTTACAAAGATCAATTATTGTCGTCCCAAGAGTA  
AATACGAGATTCTTCTGTTCTGTGGAATTATTATGTCTGTGAATGCGAATCCATTTTA  
TTTTCCCGTCTTAAACGATCCTCTCATTACGATCGTTGTCTCATGGATCTTTCCCTCAG  
CGAACTCATTTTCATCGAAAGATAAAACATATTATCATATTTTCTCGT---CGAAATTCA  
CTGAAAAGTATCTGGTCGTTGAAGGATCCTAAAATTCATGTTAGATATGGCGAAAGA  
CCTATTATAGCTATAAAGGGTGCTCATCTCCTAGTTAAAAAATGTAGATATTATCTTCTA  
ATTTTTCGGCAATTTTATTTCCATCTTTGGTCCGAACCGTATAGGGTCTGTTCTCATCAA  
TTATCCAA---GAATTGTTCTTCTTCTCCAGGTTATTTTTTGAGGGTTCGGATGAACCCCT  
ATTTTGGTCAGAACCAAAATGCTCGATGAGTTATTCATCGCCGATCTTATTACCGATGAA  
ATTGATCCAATAGTTCCGATTGTACCAATAATTGGATTATTGGCTACAGAAAAATTCTGT  
GACATATCAGGGCGGCCAATTAGTAAATTGTCTTGGACCAGTCTAACAGATGATGATATC  
CTCGATCGATTGATCAAATTTGGAGAAATCTTTTTCTTACTACAGTGGATCCTTTGAT  
CGAGATGGTTTATATCGTATAAAGTAtatact

>Podocarpus\_matudae\_SHL106

TTTTGTCGCTGgATCcGAGACGCTCcTTGTTTGCATCTATtGCGATGCATTCTATATGAA  
TGTCGAAaTAGTTCCAATTCCGAGAATTGCAAAAAGCAATTTTTGTTAGCcTGAAAGAG  
AATAAAAAATTCTATCTGTTTTGTGGAATTCTTATGTTTGTGAATGTGAATCCATTCTA  
GTTCCCTTATGAAGCGATTTTCTCATTACAATTGTTGCCTATGGATCTCTTCCCGAA  
CGAACTCATTTTGATCGAAAAATCAAGCATATTCTCATATTTTCGTTGT---ACAATTCA  
ACGAAAAGGATCTGGATCTTAAAGGATCCTTTATTTCACTATGTGAGATATCGAGAAAGA  
TCCCTCGTAGCGCTGAAGGGTAGCGCACTTCAAGAGAAAAAATGGAAATATCATCTTCTC  
CACTTTTGGCTACGTTATTCCCATCTTTGGCCCCAACCATATAGGGTATGGATTTTCGAA  
TTACCCAA---GAATTGTTTTCTTTTCTCGGGTTCTCTGAGTATAAAAATGAAATAT  
CTCGCGTTAGAACAAAAATGCTAGATAATTCATTCACTTACCTCATTACCAATGAA  
ATTCATCCAATAGCTCCAATTAGATCAATCATTTCTTTCTTGGCTAAAGAAAGGTTCTGT  
GACATCTTTGGTCGGCCAATTAGTAAATTTGCCTGGGCCAGCCTGACAGATGACGATATC  
CTCGATCGATTGATCGAATTTGGAGTAATTTTTTCTTACTACAGTGGGTCTTTCAAT  
CAAGATGGTTTATATAGTATAAAGTATATACT

>Podocarpus\_matudae\_SHL45

TTTCGTCGCTGGATCCGAGACGCTCCTTGTGTTGCATCTATTGCGATGCATTCTATATGAA  
TGTCGAAATAGTTCCAATTCCGAGAATTGCAAAAAGCAATTTTTGTTAGCCTGAAAGAG  
AATAAAAAATTCTATCTGTTTTGTGGAATTCTTATGTTTGTGAATGTGAATCCATTCTA  
GTTCCCTTATGAAGCGATTTTCTCATTACAATTGTTGCCTATGGATCTCTTCCCGAA  
CGAACTCATTTTGATCGAAAAATCAAGCATATTCTCATATTTTCGTTGT---ACAATTCA  
ACGAAAAGGATCTGGATCTTAAAGGATCCTTTATTTCACTATGTGAGATATCGAGAAAGA

matK280218

TCCCTCGTAGCGCTGAAGGGTAGCGCACTTCAAGAGAAAAAATGGAAATATCATCTTCTC  
CACTTTTGGCTACGTTATTTCCCATCTTTGGCCCCAACCATATAGGGTATGGATTTTCGAA  
TTACCCAA---GAATTGTTTTCTTTTCTCGGGTTCTCTGAGTATAAAAATGAAATAT  
CTCGCGGTTAGAACAAAAATGCTAGATAATTCATTCATTACTTACCTCATTACCAATGAA  
ATTCATCCAATAGCTCCAATTAGATCAATCATTTCTTTCTTGGCTAAAGAAAgGTTCTGT  
GACATCTTTGGTCGGCCAATTAGTAAATTTGCCTGGGCCAGCCTGACAGATGACGATATC  
CTCGATCGATTGATCGAATTTGGAGTAATTTTTTTCATTACTACAGTGGGTCTTTCAaT  
CAAGATGGTTTATATAGTATAAAGTATATACT

>Pseudotsuga\_menziesii\_DSG774

TTTCGTCGCTGGATCCGAGATGCTCCCTCCTTGACCTATTACGATCTGTTCTCTATGAA  
TA-----TCGAAATAGTTCAgAAAAATTACAAAGATCACTTATTGTCGCCCCGAGAGTG  
AATACGAGATTCTTCCTGTTCTGTGGAATCATTATGTCTATGAATGCgAATCCATTTTA  
GTTCCCTTTCTTAAACGATCCTCTCATTACGATCATTGTCTCATGGATCTTCCCTGAg  
CGAACTCATTTTAATCGAAAGATAAAACATATTCTCATATTTTCTCGT---CgAAaTTCA  
CTGAAAAGGATCTGGTCGTTGAAGGATCCTAACATTCACTATGTTAGATATGGAGAAAAGA  
TCTATTATAGCTATAAAGGGTACTCATCTCCTAGTGAAAAAATGTAGATATCATCTTCTA  
ATTTTTCGGCAATGTTATTTCCATCTTTGGTTCGAACCATATAGGGTATGTTCTCATCAA  
TTATCCAA---GAATTGTTCTTCTCTAGGCTATTTTCTGAGGATTCGGATGAAACCT  
CTTTTGGTCAGGACCAAAATGCTAgATGAGTTATTTATTGCCGATCTGATTACCGGTGAA  
TTTGATCCaATAGTTCCGATTATACCAATAATTGGATTATTGGCTAGAGAAAAAATTCTGT  
GACATATCAGGGCGGCCAATTAGTAAATTGTCTTGGACCAgTCTAACAGATGATGATATC  
CTCGATCGATTTGATCGAATTTGGAGAAATATTTTTTCACTACTATAGTGGATCCTTTGGT  
CGAGATGGTTTATATCGTATAAAGTATATACT

>Pseudotsuga\_menziesii\_SHL133

ttTCGTCGCTgGATCCGAGATGCTCCCTCCTTGCAcTATTACGATCTGTTCTCTATGAA  
TA-----TCGAAATAGTTCAgAAAAATTACAAAGATCACTTATtGTCGCCCCGAGAGTG  
AATACGAGATTCTTCCTGTTCTGTGGAATCATTATGTCTATGAATGCGAATCCATTTTA  
GTTCCCTTTCTTAAACGATCCTCTCATTACGATCATTGTCTCATGGATCTTCCCTGAG  
CGAACTCATtTTAATCGAAAGATAAAACATATTCTCATATTTTCTCGT---CGAAATTCA  
CTGAAAAGGATCTGGTCGTTGAAGGATCCTAACATTCACTATGTTAGATATGGAGAAAAGA  
TCTATTATAGCTATAAAGGGTACTCATCTCCTAGTGAAAAAATGTAGATATCATCTTCTA  
ATTTTTCGGCAATGTTATTTCCATCTTTGGTTCGAACCATATAGGGTATGTTCTCATCAA  
TTATCCAA---GAATTGTTCTTCTCTAGGCTATTTTCTGAGGATTCGGATGAAACCT  
CTTTTGGTCAGGACCAAAATGCTAGATGAGTTATTTATTGCCGATCTGATTACCGGTGAA  
TTTGATCCAATAGTTCCGATTATACCAATAATTGGATTATTGGCTAGAGAAAAAATTCTGT  
GACATATCAGGGCGGCCAATTAGTAAATTGTCTTGGACCAgTCTAACAGATGATGATATC  
CTCGATCGATTTGATCGAATTTGGAGAAATATTTTTTCACTACTATAGTGGATCCTTTGGT  
CGAGATGGTTTATATCGTATAAAGTATATACT

>Pseudotsuga\_menziesii\_SHL75

ttTCGTCGCTGgATCcGAGATGCTCCCTCCTTGCAcTATTACGATCTGTTCTCTATGAA  
TA-----TCGAAATAGTTCAgAAAAATTACAAAGATCACTTATtGTCGCCCCGAGAGTG  
AATACGAGATTCTTCCTGTTCTGTGGAATCATTATGTCTATGAATGCGAATCCATTTTA  
GTTCCCTTTCTTAAACGATCCTCTCATTACGATCATTGTCTCATGGATCTTCCCTGAG  
CGAACTCATTTTAATCGAAAGATAAAACATATTCTCATATTTTCTCGT---CGAAATTCA  
CTGAAAAGGATCTGGTCGTTGAAGGATCCTAACATTCACTATGTTAGATATGGAGAAAAGA  
TCTATTATAGCTATAAAGGGTACTCATCTCCTAGTGAAAAAATGTAGATATCATCTTCTA

matK280218

ATTTTTCGGCAATGTTATTTCCATCTTTGGTTCGAACCATATAGGGTATGTTCTCATCAA  
TTATCCAA---GAATTGTTCTTCTCTAGGCTATTTCTGAGGATTCGGATGAAACCT  
CTTTTGGTCAGGACCAAAATGCTAGATGAGTTATTTATTGCCGATCTGATTACCGGTGAA  
TTTGATCCAATAGTTCCGATTATACCAATAATTGGATTATTGGCTAGAGAAAAATTCTGT  
GACATATCAGGGCGGCCAATTAGTAAATTGTCTTGGACCAGTCTAACAGATGATGATATC  
CTCGATCGATTGATCGAATTTGGAGAAATATTTTCATTACTATAGTGGATCCTTTGGT  
CGAGATGGTTTATATCGTATAAAGTATATACT

>Taxus\_globosa\_APO02

TtTCGTCGCTgGATcCGAGATGCTCCTTCTTGCATCTATTACGATCCATTCTACACGAA  
TGGAGAAATAGTTTTAGT-----AATTTGCAGAAAGC---TCTGGTTCCACCGAGGGAG  
AATAGGAGGTTCTCCCTGTTCTGTGGAATTCTTATGTATATGAATGTGAATCCTTTTTA  
GTTTCGCTTCTGAAACAATTTTATAATTCACGATCGTTGTTGTATGGATCTTTTCCCGAT  
CGAACTCATTTTGATAAAAAGATCAAACATATTGTCATATTCCGGTC---AAAATTTCA  
ACGAAAAGGATCTGGTTGTTGAAGTATCCTTTCATATACTATGTTAGATATGGAGAAAGA  
TCCCTTATAGCTCTAAAAGGTACTCACCTTCAAGTGAAAAGATGTAGATATCATCTGTTT  
AATTTTTGGCAATATTATTTCCATCTTTGGTCTCAACCGTATAGGGTATGTATTCTTGAA  
CTATCCAA---GATTATTTTTCTTTTTAGGTCATTTTCTGAGTTTTAAAATGAAAAC  
CTCGTGGTTAGGACCAAAATGCTAGATGATTTATTGATTAGCGATATCATTGCCAATGAA  
TTTAATCCAATAGCTCCGATTAGATCCATTCTTTTATTTGACTAAAGAAAGGTTCTGT  
GACATCTCAGGGCAGCCAATTAGTAGATTGTCTGACCAATCTATCAGATGATGATATC  
CTCGATCGATTGATCGAATGTGTAGAAATCTTTTTCATTACTACAGTGGATCCATTAAT  
AAAGATGGTTTATATTATATAAAGTATATACT

>Taxus\_globosa\_DSG772414

TTTCGTCGCTGGATCCGAGATGCTCcTTCTTTGCATCTATTACGATCCATTCTACACGAA  
TGGAGAAATAGTTTTAGT-----AATTTGCAGAAAGC---TCTGGTTCCACCGAGGGAG  
AATAGGAGGTTCTCCCTGTTCTGTGGAATTCTTATGTATATGAATGTGAATCCTTTTTA  
GTTTCGCTTCTGAAACAATTTTATAATTCACGATCGTTGTTGTATGGATCTTTTCCCGAT  
CGAACTCATTTTGATAAAAAGATCAAACATATTGTCATATTCCGGTC---AAAATTTCA  
ACGAAAAGGATCTGGTTGTTGAAGTATCCTTTCATATACTATGTTAGATATGGAGAAAGA  
TCCCTTATAGCTCTAAAAGGTACTCACCTTCAAGTGAAAAGATGTAGATATCATCTGTTT  
AATTTTTGGCAATATTATTTCCATCTTTGGTCTCAACCGTATAGGGTATGTATTCTTGAA  
CTATCCAA---GATTATTTTTCTTTTTAGGTCATTTTCTGAGTTTTAAAATGAAAAC  
CTCGTGGTTAGGACCAAAATGCTAGATGATTTATTGATTAGCGATATCATTGCCAATGAA  
TTTAATCCAATAGCTCCGATTAGATCCATTCTTTTATTTGACTAAAGAAAGGTTCTGT  
GACATCTCAGGGCAGCCAATTAGTAGATTGTCTGACCAATCTATCAGATGATGATATC  
CTCGATCGATTGATCGAATGTGTAGAAATCTTTTTCATTACTACAGTGGATCCATTAAT  
AAAGATGGTTTATATTATATAAAGTATATACT

>Taxus\_globosa\_SHL79

TTTCGTCGCTGGATCCGAGATGCTCcTTCTTTGCATCTATTACGATCCATTCTACACGAA  
TGGAGAAATAGTTTTAGT-----AATTTGCAGAAAGC---TCTGGTTCCACCGAGGGAG  
AATAGGAGGTTCTCCCTGTTCTGTGGAATTCTTATGTATATGAATGTGAATCCTTTTTA  
GTTTCGCTTCTGAAACAATTTTATAATTCACGATCGTTGTTGTATGGATCTTTTCCCGAT  
CGAACTCATTTTGATAAAAAGATCAAACATATTGTCATATTCCGGTC---AAAATTTCA  
ACGAAAAGGATCTGGTTGTTGAAGTATCCTTTCATATACTATGTTAGATATGGAGAAAGA  
TCCCTTATAGCTCTAAAAGGTACTCACCTTCAAGTGAAAAGATGTAGATATCATCTGTTT  
AATTTTTGGCAATATTATTTCCATCTTTGGTCTCAACCGTATAGGGTATGTATTCTTGAA



matK280218

CTATCCAA---GATTTATTTTTCTTTTTTAGGTCATTTTCTGAGTTTTAAAATGAAAACCT  
CTCGTGGTTAGGACCAAAATGCTAGATGATTTATTGATTAGCGATATCATTGCCAATGAA  
TTTAATCCAATAGCTCCGATTAGATCCATTCTTTTATTTGACTAAAGAAAGGTTCTGT  
GACATCTCAGGGCAGCCAATTAGTAGATTGTCCTGGACCAATCTATCAGATGATGATATC  
CTCGATCGATTGATCGAATGTGTAGAAATCTTTTTCTTACTACAGTGGATCCATTAAT  
AAAGATGGTTTATATTATATAAAGTATATACT

>Taxodium\_mucronatum\_SHL241

TtTCGTCGCTGGATTCGAGATGCTCcTTCTTGCATTATTACGATCCATTCTCCATGAG  
TGGAAAAATAGTTTTAGTCGAGAAAAATTTGCAGAAAGC---TCTGATTACACAGAGAGAA  
AATACGAGGTTCTCCCTGTTCTTTGGAATTCTTATGTGTATGAATGCGAATCGTTCTTA  
ATTCTCTTATTAACGATTTTTTAATTCACAATCGTTGTTATATGGATCTTTTCCCGAT  
CGAACTCATTTTGATAAAAAGATCAAAGATATTGTTCTATTTCCCAT---AAAATTTCT  
TCAAAAAAGATCTGGTTGTTGAAGGATTCTCACATCCATTATGTGAGATATGGAGAAAGA  
TCCCTTATGGCTCTAAAGGGTACGCACCTTCAAGTGAAAAAATGTAGATATCATCTGTTT  
CATTTTTGGCAATACTATTTTCATCTTTGGTTTCAACCGTATAGGATATGCAGTCTTGAA  
TTATCCAA---GACTTCTTTTTCTTTTTTAGGTTATTTTCTGCATGTTAAAATGAAACCT  
CTCGTGGTTAGGGCCAAAATGCTAGATGATTTATTCATTACCGATCTCATTACCAATGAA  
TTAAACCCAATAGCTCCGATTAGATCAATTCTTTTCTTTTGGCTAAAGAAAAATTTGT  
GACATCTCAGGGTGGCCAATTAGTAAATTGTCTTGGGCCAGTCTATCAGATGATGATATC  
CTCGATCGATTGATCGAATTTGGATAAATCTTTTTCTTACTACAGTGGATCAATCAAT  
CAAGATGGTTTATATCATATAAAGTATATACT

>Taxodium\_mucronatum\_SHL26

TTTCGTCGCTGGATTCGAGATGCTCCTTCTTGCATTATTACGATcCATTCTCCATGAG  
TGGAAAAATAGTTTTAGTCGAGAAAAATTTGCAGAAAGC---TCTGATTACACAGAGAGAA  
AATACGAGGTTCTCCCTGTTCTTTGGAATTCTTATGTGTATGAATGCGAATCGTTCTTA  
ATTCTCTTATTAACGATTTTTTAATTCACAATCGTTGTTATATGGATCTTTTCCCGAT  
CGAACTCATTTTGATAAAAAGATCAAAGATATTGTTCTATTTCCCAT---AAAATTTCT  
TCAAAAAAGATCTGGTTGTTGAAGGATTCTCACATCCATTATGTGAGATATGGAGAAAGA  
TCCCTTATGGCTCTAAAGGGTACGCACCTTCAAGTGAAAAAATGTAGATATCATCTGTTT  
CATTTTTGGCAATACTATTTTCATCTTTGGTTTCAACCGTATAGGATATGCAGTCTTGAA  
TTATCCAA---GACTTCTTTTTCTTTTTTAGGTTATTTTCTGCATGTTAAAATGAAACCT  
CTCGTGGTTAGGGCCAAAATGCTAGATGATTTATTCATTACCGATCTCATTACCAATGAA  
TTAAACCCAATAGCTCCGATTAGATCAATTCTTTTCTTTTGGCTAAAGAAAAATTTGT  
GACATCTCAGGGTGGCCAATTAGTAAATTGTCTTGGGCCAGTCTATCAGATGATGATATC  
CTCGATCGATTGATCGAATTTGGATAAATCTTTTTCTTACTACAGTGGATCAATCAAT  
CAAGATGGTTTATATCATATAAAGTATATACT

>Taxodium\_mucronatum\_SHL35

TTTCGTCGCTgGATTCGAGATGCTCcTTCTTGCATTATTACGATCCATTCTCCATGAG  
TGGAAAAATAGTTTTAGTCGAGAAAAATTTGCAGAAAGC---TCTGATTACACAGAGAGAA  
AATACGAGGTTCTCCCTGTTCTTTGGAATTCTTATGTGTATGAATGCGAATCGTTCTTA  
ATTCTCTTATTAACGATTTTTTAATTCACAATCGTTGTTATATGGATCTTTTCCCGAT  
CGAACTCATTTTGATAAAAAGATCAAAGATATTGTTCTATTTCCCAT---AAAATTTCT  
TCAAAAAAGATCTGGTTGTTGAAGGATTCTCACATCCATTATGTGAGATATGGAGAAAGA  
TCCCTTATGGCTCTAAAGGGTACGCACCTTCAAGTGAAAAAATGTAGATATCATCTGTTT  
CATTTTTGGCAATACTATTTTCATCTTTGGTTTCAACCGTATAGGATATGCAGTCTTGAA  
TTATCCAA---GACTTCTTTTTCTTTTTTAGGTTATTTTCTGCATGTTAAAATGAAACCT

matK280218

CTCGTGGTTAGGGCCAAAATGCTAGATGATTTATTCATTACCGATCTCATTACCAATGAA  
TTAAACCCAATAGCTCCGATTAGATCAATTCTTTTCTTTTGGCTAAAGAAAAATTTGT  
GACATCTCAGGGTGGCCAATTAGTAAATTGTCTTGGGCCAGTCTATCAGATGATGATATC  
CTCGATCGATTGATCGAATTTGGATAAATCTTTTTCATTACTACAGTGGATCAATCAAT  
CAAGATGGTTTATATCATATAAAGTATATACT

>Ginkgo\_biloba\_JN867578.1

TTTCGTCGCTGGGTTCGAGATGCTCCTTCTTTACACTTATCACGATCTGTTCTCCACGAA  
CATCGGAATAGTTCGGAG-----AATTTGTATAAATCGATTCTCATCGCTCCGGAAGGA  
AATACAAAGTTCTTTCTGTTTCTGTGGAATTATTATGCTTATGAATGTGAATCTCTCCTA  
GTTCCCTTCGGAACGATCTTCTCATTACGATTGTTGTCCTATGGAGCTTTTCTCGAG  
CAAATTCATTCTTATCGAAAAGATCGAACATATTGTCATATTTCCCGT---CGTAATTTA  
GCAAAAAGTATCTGGTCTTTGAAGGATTCTTCCATTCTTATGTAAGGTATGGGGAAAGA  
TCTATTATGGCTCTGAAGGGTGCTCACTCCCCAGTCAGGAGATGGAGATATTATCTTTCA  
ATTTTTTGGCGATGTTATTTCCATTCTGGTCCCAACCGTATAGGATACGGATCGATGAA  
TTATC---CAATAATTGTTCTTCTTTTAGGCTATTTCTGGGCGTTCGAATGAATACT  
TCCGTGGTTAGGATCAAAATGCTAGATGATTTATTCATTACCGATCTTATTACCAATGAA  
TTTGATTCAATAGCTCCGATTATACCTCTGATTGGATTATTGGCTAAAGAAAGGTTTTGT  
GACATTTCAGGGCGTCCAATTAGTAAATTGGCTTGGACCGGTCTAAAAGATGATGATATT  
CTTGATCGATTGATCGAATTTGTAGAAACATTATTGATTACTACAGTGGATCTTTCAAT  
AAAGATGGTTCATATCGGATGAAGTATATACT

>Ginkgo\_biloba\_KP099648.1

TTTCGTCGCTGGGTTCGAGATGCTCCTTCTTTACACTTATCACGATCTGTTCTCCACGAA  
CATCGGAATAGTTCGGAG-----AATTTGTATAAATCGATTCTCATCGCTCCGGAAGGA  
AATACAAAGTTCTTTCTGTTTCTGTGGAATTATTATGCTTATGAATGTGAATCTCTCCTA  
GTTCCCTTCGGAACGATCTTCTCATTACGATTGTTGTCCTATGGAGCTTTTCTCGAG  
CAAATTCATTCTTATCGAAAAGATCGAACATATTGTCATATTTCCCGT---CGTAATTTA  
GCAAAAAGTATCTGGTCTTTGAAGGATTCTTCCATTCTTATGTAAGGTATGGGGAAAGA  
TCTATTATGGCTCTGAAGGGTGCTCACTCCCCAGTCAGGAGATGGAGATATTATCTTTCA  
ATTTTTTGGCGATGTTATTTCCATTCTGGTCCCAACCGTATAGGATACGGATCGATGAA  
TTATC---CAATAATTGTTCTTCTTTTAGGCTATTTCTGGGCGTTCGAATGAATACT  
TCCGTGGTTAGGATCAAAATGCTAGATGATTTATTCATTACCGATCTTATTACCAATGAA  
TTTGATTCAATAGCTCCGATTATACCTCTGATTGGATTATTGGCTAAAGAAAGGTTTTGT  
GACATTTCAGGGCGTCCAATTAGTAAATTGGCTTGGACCGGTCTAAAAGATGATGATATT  
CTTGATCGATTGATCGAATTTGTAGAAACATTATTGATTACTACAGTGGATCTTTCAAT  
AAAGATGGTTCATATCGGATGAAGTATATACT
